# **Inhibition of Anti-viral Stress Granule Formation by infectious bronchitis virus endoribonuclease nsp15 Ensures Efficient Virus Replication**

Bo Gao<sup>1#</sup>, Xiaoqian Gong<sup>1,4#</sup>, Shouguo Fang<sup>3</sup>, Wenlian Weng<sup>1</sup>, Yingjie Sun<sup>1</sup>,  
Chunchun Meng<sup>1</sup>, Lei Tan<sup>1</sup>, Cuiping Song<sup>1</sup>, Xusheng Qiu<sup>1</sup>, Weiwei Liu<sup>1</sup>, Maria  
Forlenza<sup>4</sup>, Chan Ding<sup>12</sup>, Ying Liao<sup>1\*</sup>

1. Department of Avian Diseases, Shanghai Veterinary Research Institute, Chinese Academy of Agricultural Sciences, Shanghai, 200241. P. R. China
2. Jiangsu Co-innovation Center for Prevention and Control of Important Animal Infectious Diseases and Zoonoses, Yangzhou University, Yangzhou, 225009, P. R. China
3. College of Agriculture, College of Animal Sciences, Yangtze University, 88 Jingmilu, Jingzhou 434025, Hubei, PR China
4. Wageningen University and Research, Cell Biology and Immunology Group, De Elst 1, 6708WD, Wageningen, The Netherlands

\*Corresponding author.

Ying Liao, Phone: +86-21-34680291, Fax: +86-21-54081818, Email: [liaoying@shvri.ac.cn](mailto:liaoying@shvri.ac.cn)

#These authors contribute equally as co-first author

Running title: Nsp15 of IBV suppresses the formation of anti-viral SGs

## 1 **Abstract**

2       Cytoplasmic stress granules (SGs) are generally triggered by stress-induced  
3 translation arrest for storing mRNAs. Recently, it has been shown that SGs exert anti-  
4 viral functions due to their involvement in protein synthesis shut off and recruitment of  
5 innate immune signaling intermediates. The largest RNA virus, coronavirus, mutates  
6 frequently and circulates among animals, imposing great threat to public safety and  
7 animal health; however, the significance of SGs in coronavirus infections is largely  
8 unknown. Infectious bronchitis virus (IBV) is the first identified coronavirus in 1930s  
9 and has been prevalent in poultry farm for many years. In this study, we provide  
10 evidence that IBV overcomes the host antiviral response by inhibiting SGs formation  
11 *via* the virus-encoded endoribonuclease nsp15. By immunofluorescence analysis, we  
12 observed that IBV infection not only did not trigger SGs formation in approximately  
13 80% of the infected cells, but also impaired the formation of SGs triggered by heat  
14 shock, sodium arsenite, or NaCl stimuli. We show that the intrinsic endoribonuclease  
15 activity of nsp15 is responsible for the inhibition of SGs formation. In fact, nsp15-  
16 defective recombinant IBV (rIBV-nsp15-H238A) greatly induced the formation of SGs,  
17 along with accumulation of dsRNA and activation of PKR, whereas wild type IBV  
18 failed to do so. Consequently, infection with rIBV-nsp15-H238A triggered  
19 transcription of IFN- $\beta$  which in turn greatly affected recombinant virus replication.  
20 Further analysis showed that SGs function as antiviral hub, as demonstrated by the  
21 attenuated IRF3-IFN response and increased production of IBV in SG-defective cells.  
22 Additional evidence includes the aggregation of PRRs and signaling intermediates to  
23 the IBV-induced SGs. Collectively, our data demonstrate that the endoribonuclease  
24 nsp15 of IBV suppresses the formation of antiviral hub SGs by regulating the  
25 accumulation of viral dsRNA and by antagonizing the activation of PKR, eventually  
26 ensuring productive virus replication. We speculate that coronaviruses employ similar  
27 mechanisms to antagonize the host anti-viral SGs formation for efficient virus  
28 replication, as the endoribonuclease function of nsp15 is conserved in all coronaviruses.

29

## 30 **Author summary**

31 It has been reported that stress granules (SGs) are part of the host cell antiviral  
32 response. Not surprisingly, viruses in turn produce an array of antagonists to counteract  
33 such host response. Here, we show that IBV inhibits the formation of SGs through its  
34 endoribonuclease nsp15, by reducing the accumulation of viral dsRNA, evading the  
35 activation of PKR, and by subsequently inhibiting eIF2 $\alpha$  phosphorylation and SGs  
36 formation. Nsp15 also inhibits SG formation independent of the eIF2 $\alpha$  pathway,  
37 probably by targeting host mRNA. Depletion of SG scaffold proteins decreases IRF3-  
38 IFN response and increases the production of IBV. All coronaviruses encode a  
39 conserved endoribonuclease nsp15, and it will be important to determine whether also  
40 other (non-avian) coronaviruses limit the formation of anti-viral SGs in a similar  
41 manner.

## 42 **Introduction**

43 RNA viruses must generate double-stranded RNA (dsRNA) in order to replicate  
44 their genome. Host cells consequently employ a variety of pattern recognition (PRRs)  
45 receptors to detect dsRNA and trigger innate antiviral responses, which play a pivotal  
46 and critical role in fighting viral infections [1]. The host dsRNA-activated protein  
47 kinase R (PKR) is a key element of innate antiviral defenses [2]. Following binding to  
48 dsRNA, PKR undergoes auto-phosphorylation and phosphorylates the alpha subunit of  
49 eukaryotic initiation factor (eIF2 $\alpha$ ) on serine 51 [2, 3]. Phospho-eIF2 $\alpha$  tightly binds to  
50 eIF2 $\beta$ , prevents the recycling of ternary complex tRNA<sup>Met</sup>-GTP-eIF2, and inhibits 43S  
51 translation complex formation, leading to global translation shut off, severely impairing  
52 virus replication [4]. In addition to PKR, there are three other eIF2 $\alpha$  kinases involved  
53 in translation inhibition: PKR-like endoplasmic reticulum kinase (PERK), general  
54 control nonderepressible protein 2 (GCN2), and heme-regulated inhibitor kinase (HRI),  
55 which senses unfolded proteins in the endoplasmic reticulum (ER), nutrient  
56 starvation/UV[5, 6], and oxidative stress, respectively [7-9]. The translation inhibition  
57 leads to polysome disassembly and the subsequent assembly of stress granules (SGs),

58 a membrane-less, highly dynamic warehouse for storing mRNA and translation  
59 components [10]. SGs assembly is driven by aggregation-prone cellular RNA-binding  
60 proteins: Ras GTPase-activating protein-binding protein 1 (G3BP1), T cell-restricted  
61 intracellular antigen 1 (TIA-1), and TIA-1-related protein (TIAR) [11-13]. Meanwhile,  
62 the post-translational modifications, including ubiquitination, poly (ADP)-ribosylation,  
63 O-linked N-acetyl glucosamination, phosphorylation, and dephosphorylation, regulate  
64 the SGs formation by modifying the components of SGs [14, 15]. Once stress is relieved  
65 and translation activities are restored, SGs are disassembled and mRNAs rapidly  
66 resume translation [16].

67 In addition to PKR, there are other two groups of PRRs to recognize dsRNA,  
68 namely Toll like receptors (TLRs) and RIG-I like receptors (RLRs) [17, 18]. One of the  
69 TLRs, TLR3, located on the endosomal membrane, senses dsRNA and single stranded  
70 RNA (ssRNA) generated by RNA virus or DNA virus. This in turn activates either the  
71 NF- $\kappa$ B or IRF3/7 pathway, resulting in boosting the production of proinflammatory  
72 cytokines and type I interferon (IFN) [19]. Another group of essential PRRs, RLRs,  
73 composed of RIG-I and MDA5, ubiquitously exist in the cytoplasm of mammal cells,  
74 recognize 5'-pppRNA and long dsRNA derived from RNA virus, respectively.  
75 Activation of RLRs by viral RNA leads to the aggregation of MAVS and recruitment  
76 of a series of signaling intermediates, transmits the signaling to transcription factor  
77 IRF3, IRF7, or NF- $\kappa$ B, eventually promoting the transcription of proinflammatory  
78 cytokines and type I IFN [20-22]. Consequently, the secretion of type I IFN stimulates  
79 the transcription of IFN-stimulated genes (ISGs) *via* the JAK-STAT pathway, which  
80 protect neighboring cells from virus infection [23].

81 Recent evidence has shown that PKR and RLRs are localized to SGs during virus  
82 infection [24]. It is proposed that SGs exert specific antiviral activities by providing a  
83 platform for interaction between antiviral proteins and non-self RNA. To accomplish  
84 efficient replication, some viruses have evolved various mechanisms to circumvent the  
85 formation of anti-viral SGs. For instance, Influenza A Virus (IAV) NS1 protein and  
86 Vaccinia virus E3L sequester dsRNA from PKR [25, 26], Ebola virus sequesters SG

87 core proteins to viral inclusion body, thereby inhibiting the formation of SGs [27]. For  
88 some picornaviruses, leader protease and 3C protease of foot-and-mouth disease virus  
89 (FMDV) and 2A protease of Enterovirus 71, disassemble the SGs by cleaving G3BP1  
90 or G3BP2 [28-31]. As for coronaviruses, recent studies show that middle east  
91 respiratory syndrome coronavirus (MERS-CoV) 4a accessory protein limits the  
92 activation of PKR by binding to dsRNA, thereby inhibiting the formation of SGs and  
93 ensuring viral protein translation and efficient virus replication [32, 33]. Mouse  
94 hepatitis virus (MHV) replication induces host translational shutoff and mRNA decay,  
95 with concomitant formation of stress granules and processing bodies [34]. Porcine  
96 transmissible gastroenteritis virus (TGEV) induced SG like granules correlated with  
97 viral replication and transcription [35]. Several SG proteins (including caprin and G3BP)  
98 have been reported to be associated with IBV-N protein [36]. A recent report shows  
99 that infectious bronchitis virus (IBV) infection results in the formation of SGs in  
100 approximately 20% of infected cells and inhibits eIF2 $\alpha$ -dependent/eIF2 $\alpha$ -independent  
101 SG formation by unknown mechanisms [37].

102 Coronaviruses harbor the largest positive-stranded RNA genome among the RNA  
103 viruses, with size from 27 kb to 32 kb. The two-third of the 5' terminus encodes  
104 replicase polyproteins (1a and 1ab), while one-third of the 3' terminus encodes spike  
105 protein (S), envelope protein (E), membrane protein (M), nucleocapsid protein (N) and  
106 accessory proteins. The proteolysis of overlapped polyproteins is processed by two self-  
107 encoded proteases, papain-like protease (PLpro) and 3C-like protease (3CLpro), into  
108 15-16 mature non-structural proteins (nsp1-nsp16). Most of the nsps assemble into a  
109 replication and transcription complex (RTC) responsible for virus replication, while  
110 several nsps mediate the evasion of host innate immune responses. For example, severe  
111 acute respiratory syndrome coronavirus (SARS-CoV) and MERS-CoV nsp1 suppresses  
112 host gene expression by mediating host mRNA degradation [38]; the PLpro nsp3 of  
113 SARS-CoV and MERS-CoV harbors deubiquitinase activity and interferes with type I  
114 IFN responses [39, 40]; feline infectious peritonitis coronavirus (FCoV) and porcine  
115 deltacoronavirus (PDCoV) nsp5 inhibits type I IFN response by cleaving NEMO [41,

116 42]; porcine epidemic diarrhea virus (PEDV) nsp16 restricts IFN production and  
117 facilitate virus replication [43]; MHV nsp15 endonuclease activity is key to evade  
118 double-stranded RNA (dsRNA) sensing by host sensors and ensures efficient  
119 coronavirus replication [44].

120 IBV is the first identified coronavirus in 1930s and infects avian species [45]. It  
121 causes a prevalent disease that has led to substantial economic losses in poultry farm  
122 for many decades. Elucidating host responses to IBV infection is fundamental to  
123 understand virus replication and identify targets for therapeutic control. In this study,  
124 we infected three types of cells with IBV, and found that approximately 80% of infected  
125 cells did not display SGs formation. IBV also hindered SGs formation triggered by  
126 different canonical stress stimuli. Further analysis showed that IBV nsp15 was involved  
127 in the inhibition of SG formation, and that the endoribonuclease activity of nsp15  
128 particularly played a pivotal role. Compared to wild type IBV, infection with the nsp15  
129 endoribonuclease catalytic mutant, rIBV-nsp15-H238A, led to accumulation of higher  
130 levels of dsRNA, activation of PKR, and formation SGs, concomitantly with a higher  
131 production of IFN- $\beta$  and lower viral replication. We further demonstrate that SGs play  
132 an anti-viral role by using SG-defective cells. To our knowledge, this is the first report  
133 describing the role of coronavirus nsp15 in the suppression of integral stress response  
134 as well as innate antiviral response.

135

## 136 **Results**

### 137 **IBV prevents SGs formation in the majority of infected cells**

138 In this study, we employed chicken fibroblast DF-1 cells in most experiments; in  
139 specific cases, to facilitate the detection of cellular proteins, and due to the  
140 unavailability of antibodies against chicken proteins of interest (see Table 1), we also  
141 included mammalian H1299 and Vero cells lines, which also support replication of the  
142 IBV-Beaudette strain. To determine whether IBV replication induces SGs formation,  
143 H1299, Vero, and DF-1 cells were infected with IBV-Beaudette strain at MOI=1. The  
144 occurrence of SGs was assessed by visualizing G3BP1 granules formation while IBV

145 infection was monitored by visualizing the N protein. We determined the kinetics of  
146 SGs formation upon infection at 4 hours intervals, by counting the cells with IBV-N  
147 protein expression and by calculating the proportion of these that was also positive for  
148 G3BP1 granules. In all the three cell types, despite efficient virus infection, as indicated  
149 by the expression of N protein and syncytia formation, no SGs formation could be  
150 detected from 0 to 8 hours post-infection (h.p.i.), whereas from 12 to 24 h.p.i., G3BP1  
151 granules could be detected, but only in approximately 5%-25% of infected cells (Fig  
152 1A-C). These observations indicate that IBV effectively suppresses SGs formation, and  
153 that the inhibition mechanisms employed are not restricted to a specific cell type. In  
154 SGs positive cells, another SGs marker, TIAR, was found to colocalize with G3BP1  
155 granules, altogether demonstrating that IBV induces canonical SGs (Fig 1D-E). Due to  
156 the lack of antibodies specific for chicken TIAR and lack of cross-reactivity of the anti-  
157 human TIAR to chicken TIAR, we displayed the colocalization of TIAR with G3BP1  
158 in Vero and H1299 cells.

159

### 160 **Phosphorylation status of PKR and eIF2 $\alpha$ during IBV infection**

161 Although SGs can be generally induced through eIF2 $\alpha$ -dependent or -independent  
162 pathways, during viral infections SGs are mainly induced via the PKR-eIF2 $\alpha$  pathway.  
163 Several past studies demonstrate that some viruses impede SGs formation by  
164 preventing the activation of PKR, or by cleaving the SG scaffold protein G3BP1 [46,  
165 47]. To elucidate the inhibition mechanism of SG formation by IBV, we investigated  
166 whether IBV interfered with the phosphorylation of PKR and eIF2 $\alpha$  or directly affected  
167 TIA-1 and G3BP1 protein levels. After having assessed that IBV prevents SGs  
168 formation not only in chicken cells but also in two different mammalian cell lines, due  
169 to the availability of antibodies directed against mammalian proteins and their lack of  
170 cross-reactivity to the chicken proteins of interest, we next proceeded with H1299 and  
171 Vero cells. In IBV-infected H1299 cells, PKR and eIF2 $\alpha$  phosphorylation was  
172 comparable to that observed in mock infected cells (Fig 2A). In Vero cells, however,  
173 PKR, but not eIF2 $\alpha$ , phosphorylation was slightly increased at 20 and 24 h.p.i. (Fig 2B),

174 altogether suggesting that the PKR-eIF2 $\alpha$ -SGs pathway is not obviously triggered by  
175 IBV infection. In parallel, we did not observe any cleavage product of either G3BP1 or  
176 TIA-1 throughout IBV infection in both H1299 and Vero cells (Fig 2), altogether  
177 indicating that IBV may avoid PKR activation to prevent SGs formation.

178

### 179 **IBV blocks both eIF2 $\alpha$ -dependent and -independent SGs formation**

180 During the course of our study, it was reported that IBV inhibits eIF2 $\alpha$ -dependent  
181 and -independent SGs induction in Vero cells [37]. Here, we used H1299 and DF-1  
182 cells to further investigate the inhibition of SGs by IBV. H1299 and DF-1 cells were  
183 infected with IBV and treated with three different stress stimuli (sodium arsenite, heat  
184 shock and NaCl) to induce canonical SGs formation. Sodium arsenite or heat shock  
185 promotes phosphorylation of eIF2 $\alpha$  in an HRI kinase-dependent manner, leading to  
186 translational arrest and subsequent formation of SGs [48], whereas NaCl may enhance  
187 the local concentration of mRNAs and cellular proteins by decreasing the cell volume,  
188 thereby inducing SGs in an eIF2 $\alpha$ -independent manner [49]. In non-infected cells, more  
189 than 90% of cells were positive for SGs formation after treatment with these stress  
190 stimuli; interestingly, IBV infection prevented SGs formation triggered by these stimuli,  
191 as evidenced by the absence of G3BP1 granules exclusively in IBV-positive cells (Fig  
192 3A-C). These results indicate that IBV infection blocks both eIF2 $\alpha$ -dependent and  
193 independent SGs formation in both, mammalian and avian cells. Sodium arsenite  
194 treatment inefficiently triggered G3BP1 aggregation in DF-1 cells due to unknown  
195 reasons (data not shown). We next explored whether IBV interfered with the  
196 phosphorylation of eIF2 $\alpha$  triggered by sodium arsenite or heat shock. We observed a  
197 significant upregulation of phospho-eIF2 $\alpha$  by sodium arsenite or heat shock treatment  
198 in H1299 cells; however, there was no reduction of phospho-eIF2 $\alpha$  by IBV infection  
199 (Fig 3D-E). Collectively, these data indicate that IBV infection restricts both eIF2 $\alpha$ -  
200 dependent and -independent SG formation, probably by interfering with SG assembly  
201 or disassembly and not with direct eIF2 $\alpha$  phosphorylation.

202



203

## 204 **Endoribonuclease nsp15 is responsible for inhibition of SG formation**

205 To screen the IBV proteins involved in the suppression of SGs formation, we  
206 expressed individual Flag-tagged IBV protein in H1299 cells and triggered the  
207 formation of SGs with heat shock. The schematic diagram of proteins encoded by IBV  
208 was shown in Fig. 4A. In cells expressing nsp2, nsp4, nsp5, nsp6, nsp7, nsp8, nsp9,  
209 nsp12, nsp16, 3b, E, 5a, 5b, M, or N, SGs formation remained intact (Fig 4B),  
210 suggesting that alone these proteins have no inhibitory effect on the formation of SGs.  
211 Interestingly, only in nsp15-expressing cells, the heat shock-induced SGs were absent  
212 (as indicated by white arrow), suggesting that nsp15 may be the viral protein  
213 responsible for efficient suppression of SGs formation. We also investigated, but failed  
214 to detect, the expression of nsp3, nsp10, nsp13, nsp14, S, and 3a, therefore it cannot be  
215 excluded that also these viral proteins might be involved in inhibition of SG formation.  
216 These results however demonstrate that nsp15 alone is sufficient to block SGs  
217 formation.

218 Nsp15 is a conserved endoribonuclease of coronaviruses. It has been reported that  
219 its activity is involved in evasion of dsRNA sensing and interference with the type I  
220 IFN response [44, 50]. The conserved histidine (H) 223 and H238 of IBV nsp15 are  
221 critical for the endoribonuclease activity [51]. To examine whether the  
222 endoribonuclease activity is involved in the inhibition of SGs formation, we introduced  
223 an alanine (A) substitution in the catalytic core residues H223 or H238, to abrogate the  
224 catalytic activity. We next compared the ability of wild type nsp15 and mutant nsp15-  
225 H223A or nsp15-H238A to prevent SGs formation in H1299 cells. As expected, wild  
226 type nsp15 blocked the formation of SGs induced by heat shock, sodium arsenite, or  
227 NaCl (indicated with white arrow), while nsp15-H223A and nsp15-H238A did not (Fig  
228 5A-C). Thus, the nsp15 endoribonuclease activity is required for the suppression of  
229 eIF2 $\alpha$ -dependent and -independent SGs formation.

230 In a preliminary investigation of how nsp15 may prevent SG formation, we  
231 examined whether nsp15 interferes with the phosphorylation of eIF2 $\alpha$ . We observed a

232 significant increase of phospho-eIF2 $\alpha$  by sodium arsenite or heat shock treatment (Fig  
233 3D-E); however, in agreement with the Fig 3D-E data on IBV-infected cells, no  
234 reduction of phospho-eIF2 $\alpha$  was observed in nsp15-expressing cells (Fig 5D). No  
235 difference was observed also in the protein levels of G3BP1 and TIA-1 in nsp15-  
236 expressing cells, compared to control cells. Taken together, these data indicate that  
237 nsp15 interferes with the formation of SGs downstream of eIF2 $\alpha$ .

238

### 239 **Nsp15-defective rIBV-nsp15-H238A induces canonical SGs by accumulation of** 240 **dsRNA and activation of PKR**

241 To further confirm the involvement of the endoribonuclease activity of nsp15 in  
242 the disruption of SGs formation, we constructed nsp15-defective recombinant virus  
243 rIBV-nsp15-H238A in which the nsp15 catalytic site H238 was replaced with an  
244 alanine (Fig 6A). We also constructed, but failed to recover nsp15-defective rIBV-  
245 nsp15-H223A, possibly due to the effect of the disruption of the catalytic site on virus  
246 replication. We compared the ability of wild type IBV and rIBV-nsp15-H238A to  
247 induce the formation of SGs in H1299 and DF-1 cells. At 20 h.p.i., only 18% of H1299  
248 cells and 17% of DF-1 cells infected with wild type IBV showed the presence of SGs,  
249 whereas approximately 78% of the H1299 cells and 75% of DF-1 cells infected with  
250 rIBV-nsp15-H238A showed SGs formation (Fig 6B). Treatment with cycloheximide  
251 (CHX), a chemical which disassembles *bona fide* SGs, dissolved the rIBV-nsp15-  
252 H238A-induced G3BP1 and G3BP2 granules (Fig 6C), confirming that rIBV-nsp15-  
253 H238A induces canonical SGs.

254 In agreement, rIBV-nsp15-H238A significantly activated PKR by  
255 phosphorylation and in turn phosphorylated eIF2 $\alpha$ , while wild type IBV did not (Fig  
256 7A). Thus, nsp15 endoribonuclease activity is involved in antagonizing PKR activation,  
257 the well characterized dsRNA sensor and IFN- $\beta$  inducer. We noted that the replication  
258 of rIBV-nsp15-H238A was impaired, as evidenced by the decreased level of IBV-S,  
259 IBV-M, and IBV-N protein synthesis, compared to wild type IBV (Fig 7A). Moreover,  
260 although rIBV-nsp15-H238A replication was low, it significantly stimulated the

261 transcription of IFN- $\beta$  at 20 h.p.i., which was approximately 25-fold higher than that  
262 induced by wild type IBV in H1299 cells (Fig 7B, left panel), and approximately 380-  
263 fold higher than that by wild type IBV in DF-1 cells (Fig 7B, right panel). Taken  
264 together, the activation of PKR by rIBV-nsp15-H238A and associated induction of type  
265 I IFN might be responsible for the lower replication of this recombinant virus.

266 The activation of PKR by rIBV-nsp15-H238A prompted us to measure and  
267 compare the levels of dsRNA during infection by using the specific J2 monoclonal  
268 antibody, which binds dsRNA greater than 40 nucleotides in length [51] and was  
269 previously successfully used during IBV infection in chicken cells [52].  
270 Immunofluorescence analysis at 20 h.p.i., revealed evident accumulation of dsRNA in  
271 rIBV-nsp15-H238A infected H1299 cells, compared to wild type IBV infected cells  
272 (Fig 7C). The dsRNA produced by rIBV-nsp15-H238A however, did not colocalized  
273 with G3BP1 granules, suggesting the dsRNA is not recruited to SGs (Fig 7C). In DF-1  
274 cells, we also observed higher levels of dsRNA accumulation during infection with  
275 rIBV-nsp15-H238A than with wild type IBV (Fig 7D). dsRNA dot blot analysis also  
276 supported the observation that infection with rIBV-nsp15-H238A leads to higher  
277 accumulation of dsRNA than with wild type IBV (data not shown). Although the  
278 dsRNA in wild type IBV infected cells partially co-localized with IBV-N, the dsRNA  
279 produced by rIBV-nsp15-H238A did not co-localize well with IBV-N (Fig 7C-D). We  
280 speculate that when compared to wild type IBV, rIBV-nsp15-H238A replication leads  
281 to higher accumulation of dsRNA and that the excess dsRNA may escape from  
282 replication-transcription complex (RTC). The “free” dsRNA in turn, triggers the  
283 activation of PKR and phosphorylation of eIF2 $\alpha$ , results in translational shut off,  
284 eventually promoting the formation of SGs and activation of the type I IFN response.  
285 RT-PCR examination of the level of viral RNA showed that rIBV-nsp15-H238A indeed  
286 increases the ratio of negative strand RNA : positive strand RNA, compared to wild  
287 type IBV (supplementary Fig S2), suggesting the functional nsp15 is required for  
288 maintaining the ratio of viral (-:+) RNA. Altogether, these data indicate that intact  
289 nsp15 endoribonuclease activity acts to reduce the intracellular levels of dsRNA,

290 thereby preventing activation of PKR and SGs formation.

291

292 **Nsp15-defective rIBV-nsp15-H238A strongly activates the IRF3-IFN signaling via**  
293 **the formation of SG**

294 To examine the role of SGs in IBV infection, we knocked out the SGs core protein  
295 G3BP1 and G3BP2 in H1299 cells by a CRISPR-Cas9 approach. Depletion of G3BP1/2  
296 resulted in the absence of SGs during sodium arsenite stimulation and rIBV-nsp15-  
297 H238A infection (Fig 8A). In G3BP1/2 knock out cells, the levels of phospho-TBK1  
298 and phospho-IRF3 triggered by rIBV-nsp15-H238A infection were greatly decreased  
299 (Fig 8B); consequently, the transcription of *IFN- $\beta$*  and ISG *IFIT1* induced by rIBV-  
300 nsp15-H238A infection were decreased (Fig 8C). These results suggest that the  
301 formation of SGs is necessary to elicit IRF3-IFN signaling in response to rIBV-nsp15-  
302 H238A infection. It was worth noting that rIBV-nsp15-H238A infection did not  
303 significantly stimulate p65 phosphorylation, and knock out of G3BP1/2 had no obvious  
304 effect on phospho-p65 levels (Fig 8B); thus, SGs formation is not involved in NF- $\kappa$ B  
305 signaling during IBV infection. Interestingly, upon G3BP1/2 knock out, we observed  
306 higher levels of IBV-S, IBV-M, and IBV-N (Fig 8B) and in agreement, more infectious  
307 progeny virus particles were produced, as evidenced by TCID<sub>50</sub> assay (Fig 8D). This is  
308 in line with our previous suggestion that activation of the type I IFN signaling might be  
309 the factor limiting rIBV-nsp15-H238A replication; failure to trigger an IFN- $\beta$  response  
310 in G3BP1/2 knock out cells however, promotes virus replication even in the absence of  
311 nsp15 endoribonuclease activity.

312 To investigate whether the involvement of SGs in IRF3-IFN signaling is restricted  
313 to specific virus infections, we examined the IRF3-IFN signaling upon poly I:C  
314 stimulation. Results showed that in G3BP1/2 positive cells, poly I:C strongly stimulated  
315 phosphorylation of IRF3 and to a lesser extent of TBK1 (Fig 9A), and promoted IRF3  
316 nuclear translocation (Fig 9B, 34% of total cells display nuclear IRF3); however, in the  
317 absence of G3BP1/2, poly I:C stimulation led to reduced TBK1 phosphorylation, and  
318 to a greater extent, to reduced IRF3 phosphorylation (Fig 9A), as well as less IRF3

319 nuclear translation (Fig 9B, 9% of total cells with nuclear IRF3). As a consequence,  
320 transcription of *IFN-β* and *IFIT-1* was significantly decreased upon poly I:C stimulation  
321 of G3BP1/2 knock out cells (Fig 9C). Altogether, these results demonstrate that SGs  
322 positively regulates IRF3-IFN signaling and that such a mechanism is not restricted to  
323 a specific virus infection.

324

### 325 **Aggregation of PRRs and signaling intermediates to SGs during IBV infection**

326 A previous report showed that the dsRNA sensors PKR, MDA5, and RIG-I are  
327 located to SG and sense dsRNA [24]. In this study, we examined the subcellular  
328 localization of PRRs and signaling intermediates during IBV infection. In the small  
329 proportion of IBV-infected cells that displayed the presence of SGs, PKR, MDA5,  
330 TLR3 and MAVS aggregated and colocalized with G3BP1 granules (Fig 10A). These  
331 results demonstrate that SGs indeed recruit PRRs and their signaling intermediates  
332 during IBV infection. We further examined the subcellular location of signaling  
333 intermediates, results showed that TRAF3, TRAF6, TBK1, and IKKε all aggregated to  
334 G3BP1 granules (Fig 10B). These data, combined with the positive role on IRF3-IFN  
335 signaling, demonstrate that SGs may function as a platform for PRRs and downstream  
336 signaling intermediates.

337

## 338 **Discussion**

339 SGs formation or inhibition has been reported for different groups of  
340 coronaviruses: MHV and TGEV induce SGs or SG-like granules [34, 35], whereas  
341 MERS-CoV does not [32, 33], and IBV was reported to induce SGs formation but only  
342 in 20% of infected Vero cells [37], yet the biological significance of SGs in coronavirus  
343 replication is unclear. In this study, we report that IBV indeed induces SGs formation  
344 in a small proportion of infected cells and it does so not only in mammalian (H1299  
345 and Vero) cells, but also in chicken DF-1 cells. Furthermore, consistent with previous  
346 reports [53], also in our study we found that IBV inhibits both eIF2 $\alpha$ -dependent (heat  
347 shock, sodium arsenite) and -independent (NaCl) SGs formation. We also assessed SGs  
348 formation by porcine epidemic diarrhea virus (PEDV) infection, only 10%-20% of  
349 PEDV-infected Vero cells were SGs positive (data not shown). Combined with the  
350 inhibition of SGs formation by MERS-CoV [33], our results suggest that the inhibition  
351 of SG formation by coronavirus might be a universal phenomenon, not only restricted  
352 to a specific coronavirus. Screening of viral proteins involved in inhibition of SGs  
353 formation, revealed that nsp15 is a specific stress response antagonist: overexpression  
354 of nsp15 resulted in disruption of both eIF2 $\alpha$ -dependent and -independent SGs  
355 formation, which could be attributed to its endoribonuclease activity; abrogating nsp15  
356 endoribonuclease function *in vivo* led to impaired virus replication, efficient formation  
357 of SGs, accumulation of dsRNA, robust activation of PKR, and activation of IRF3-IFN  
358 signaling. Thus, functional nsp15 is specifically required for efficient virus replication  
359 as it plays a role in inhibition of SG formation and subsequent activation of an anti-  
360 viral response.

361

362 Coronaviruses are positive-stranded RNA viruses that replicate in the host cell  
363 cytoplasm. The viral RNA synthesis is performed in RTCs that include viral and cell  
364 proteins, connected with convoluted membranes and double membrane vesicles [54,  
365 55]. Replication of the coronavirus genome requires continuous RNA synthesis,  
366 whereas transcription is a discontinuous process unique among RNA viruses.

367 Transcription includes a template switch during the synthesis of sub-genomic negative  
368 strand RNAs to add a copy of the leader sequence [56-58]. The negative strand RNAs  
369 is the replication intermediate of genomic RNA and of sub-genomic RNA. During the  
370 replication and transcription process, positive and negative strand RNA form dsRNA.  
371 It has been reported that nsp13 and cellular helicases help to unwind the dsRNA for  
372 efficient replication and transcription. The amount of negative strand intermediates is  
373 approximately 10% of the positive strand RNA [59]. It is believed that the proper ratio  
374 of positive and negative stand RNA is important for efficient replication and  
375 transcription, as well as subsequent genome packaging and mRNA translation. How do  
376 coronaviruses modulate the ratio of positive and negative strand RNA? Coronavirus  
377 nsp15 has uridylylate-specific endoribonuclease activity on single-stranded RNA and  
378 dsRNA [60, 61], is considered an integral component of the RTC and co-localizes with  
379 viral RNA [62]. It has been reported that nsp15 is involved in efficient viral RNA  
380 synthesis [63, 64]. Nsp15-null MHV exhibits severe replication defects in macrophages  
381 and is highly attenuated in mice [44, 50]. As the negative strand RNA intermediates  
382 harbor a poly (U) sequence, which is complementary to the positive strand RNA poly  
383 (A) tail, we propose that nsp15 targets negative strand intermediates or dsRNA  
384 intermediates within stalled RTCs that are no longer active in viral RNA synthesis. This  
385 is supported by the observation that, compared to wild type IBV, infection with nsp15-  
386 null virus rIBV-nsp15-H238A leads to substantial accumulation of dsRNA  
387 intermediates that do not localize with RTCs and to an increased ratio of negative  
388 strand:positive strand RNA . In this way, nsp15 controls viral RNA quantity for  
389 efficient replication/transcription, thereby facilitating the proliferation of virus.  
390 Recently, Hackbart reports that nsp15 cleaves the 5'-poly(U) from negative-sense viral  
391 RNA intermediates [65], confirming our hypothesis.

392

393 Previous reports show that coronavirus nsp15 and arterivirus nsp11 act as IFN  
394 antagonists [51]. Overexpression of SARS-CoV nsp15 inhibits the IFN response and  
395 MAVS-mediated apoptosis [66]. Interestingly, Hackbart find that the poly(U)

396 containing negative-sense viral RNA is sufficient to stimulate MDA5, and nsp15 is  
397 responsible for the cleavage of the poly(U) containing negative-sense viral RNA,  
398 thereby antagonize the IFN response [65]. Here, we describe a previously unrecognized  
399 role of coronavirus nsp15 in the evasion of PKR activation and interference with SGs  
400 formation. RNA viruses that replicate via dsRNA intermediates can be detected as  
401 “non-self” by host dsRNA sensors: PKR, RIG-I, MDA5 and TLR3, eventually  
402 stimulating the production of type I IFN [19, 20, 22, 67]. It is likely that dsRNAs are  
403 shielded within double-membrane vesicles and replication intermediates are likely  
404 protected by the RTC and N protein. In this study, by generating nsp15-defective  
405 recombinant virus, we find that compared to the wild type virus, infection with rIBV-  
406 nsp15-H238A leads to dsRNA accumulation, PKR activation, robust formation of SG  
407 as well as up-regulation of *IFN- $\beta$* , which ultimately coincided with impaired rIBV-  
408 nsp15-H238A replication. Therefore, IBV nsp15 acts as IFN antagonist, likely through  
409 removal of dsRNA intermediates at sites of RNA synthesis, thereby efficiently evading  
410 integrated stress and innate anti-viral host responses. The involvement of the viral  
411 ribonuclease in degrading viral dsRNA and antagonizing IFN responses has also been  
412 reported in pestivirus and Lassa virus [68-70].

413 Several reports show that SGs serve as platform for viral dsRNA sensing by RLRs  
414 and subsequent activation of viral immune responses [71, 72]. Recent studies reported  
415 that several other IFN regulatory molecules, such as MEX3C, Riplet, DHX36 and  
416 Pumilio, also localize to SGs [73]. It is thus reasonable that viruses evolved  
417 mechanisms to suppress SGs formation in order to promote their propagation. Influenza  
418 A virus (IAV) non-structural protein 1 (NS1) is reported to be involved in subversion  
419 of PKR-dependent SG formation [25]; importantly, during NS1-null IAV infection,  
420 viral RNAs and nucleocapsid protein co-localize in SGs together with RIG-I, PKR and  
421 SGs markers G3BP1/TIAR; knock down of the G3BP1 or PKR genes abrogated NS1-  
422 null IAV-induced IFN production, concomitantly with defects in SGs formation. Here,  
423 we find that wild type IBV triggers the formation of SGs only in 20% infected cells,  
424 and that PRRs (PKR, MDA5, TLR3) and signaling intermediates (MAVS, TRAF3,



425 TRAF6, TBK1, IKK $\epsilon$ ) aggregate to the IBV-induced SGs. Nsp15-null recombinant  
426 IBV robustly activates PKR, efficiently induces SGs formation (80% infected cells with  
427 SGs formation), and strongly induced the transcription of *IFN- $\beta$* ; but in SGs' core  
428 proteins defective cells, either by nsp15-null recombinant IBV infection or poly I:C  
429 stimulation, the induction of *IFN- $\beta$*  signaling is severely impaired. These data thus  
430 further confirm that SGs play a positive regulatory role in the IRF3-IFN signaling,  
431 leading to the initiation of anti-viral innate responses, and that this is not restricted to a  
432 specific virus infection. These observations strongly suggest that the formation of SGs  
433 is critical for virus-induced antiviral innate immunity and SGs may function as a  
434 scaffold for viral RNA recognition by RLRs.

435 Virus-encoded endoribonucleases not only modulate viral RNA, but also target the  
436 majority of cellular mRNAs, likely enabling viral mRNAs to better compete for limiting  
437 translation components and directing the cell from host to virus gene expression.  
438 Targeting host mRNA for degradation not only restricts host gene expression, but also  
439 subverts SGs by depleting the core component of SG, RNA. Thus, the ribonuclease is  
440 a unique strategy for viruses to subvert SGs. It has been well characterized that the  
441 herpes simplex virus 1 (HSV-1) and HSV2 employ the virion host shutoff (VHS)  
442 endoribonuclease to impede the SGs formation [74, 75]. Infection with a mutant virus  
443 lacking VHS ( $\Delta$ VHS) results in PKR activation and PKR-dependent SGs formation in  
444 multiple cell types [76, 77]. Destabilization of host mRNAs by VHS may directly  
445 contribute to its disruption of SG formation [78]. In addition to be important in virus  
446 replication, coronavirus nsp15 may also target host mRNA and subsequently inhibit  
447 host protein translation. Interestingly, we previously showed that differently from  
448 alphacoronaviruses such as MHV and SARS-CoV [79, 80], wild-type IBV affects host  
449 protein synthesis leading to host-protein shut off, but without affecting mRNA stability  
450 [81]. In the current study, when nsp15 was overexpressed, it was worth noting that  
451 nsp15 located to nucleus (Fig 4, Fig 5A-C). Taken all our observations together, we  
452 speculate that nuclear nsp15 may interfere with the host pre-mRNA processing or  
453 nuclear export. Further studies are needed to fully elucidate the mechanisms used by

454 nsp15 to target to host protein expression system.

455       Altogether, there are several possibilities that may account for the lack of SGs  
456 formation upon transfection of nsp15 or infection with IBV (Fig 11): (1) as SGs are  
457 dynamic foci, nsp15 might be involved in the disassembly of SGs. The requirement for  
458 nsp15 endoribonuclease activity for the disruption of both eIF2 $\alpha$ -dependent or eIF2 $\alpha$ -  
459 independent SGs, implies that removal of mRNA from SGs promotes their disassembly  
460 and predicts that intact RNA is crucial for maintaining the integrity of SGs; (2) during  
461 IBV infection, nsp15 endoribonuclease activity may be involved in the regulation of  
462 virus genomic RNA replication and sub-genomic mRNA transcription, consequently  
463 functioning as a “gatekeeper” to sequester viral dsRNA within replication complexes  
464 and away from host sensor PKR, resulting in absence of SG formation; (3) nsp15  
465 prevents the assembly of SGs by promoting the destruction of mRNAs present in  
466 polysome, free mRNA, or by blocking the processing of pre-mRNA and nuclear export  
467 of mRNA, thus preventing a crucial step in SGs assembly pathway. Our unpublished  
468 data show that nsp15 interferes with the host protein translation and retains poly(A)  
469 binding protein 1 (PABP1) in the nucleus, and that the endoribonuclease activity is  
470 specifically required for this function. Thus, nsp15 probably also targets host mRNA to  
471 prevent SGs assembly. As the nsp15 endoribonuclease is conserved, we speculate that  
472 coronaviruses employ similar mechanisms to antagonize the host anti-viral SGs  
473 formation for efficient virus proliferation. Altogether, this study is the first to  
474 demonstrated that IBV coronavirus antagonize the formation of antiviral hubs SGs  
475 through the activity of its endoribonuclease nsp15, and that this is required for efficient  
476 virus proliferation.

477

## 478 **Materials and methods**

### 479 **Cells and viruses**

480 H1299 cells were purchased from Cell Bank of China Academy of Science and were  
481 maintained in Roswell Park Memorial Institute (RPMI) 1640 medium supplemented  
482 with 10% (v/v) fetal calf serum (FCS). Vero and DF-1 cells were purchased from ATCC  
483 and were grown in Dulbecco's modified eagle medium (DMEM) with 10% FCS. IBV  
484 Beaudette strain was a gift from Prof Dingxiang Liu's lab, South China Agricultural  
485 University. The recombinant virus IBV-nsp15-H238A was constructed in our  
486 laboratory with the technical support of Prof. Shouguo Fang, Yangtze University, as  
487 further detailed below.

488

### 489 **Antibodies and chemicals**

490 Rabbit anti-IBV-S, rabbit anti-IBV-M, rabbit anti-IBV-N and rabbit anti-nsp3 were the  
491 gifts from Prof Dingxiang Liu's lab, South China Agricultural University. Below we  
492 provide the list of all primary antibodies used, all of them directed against mammalian  
493 proteins; their dilution and eventual cross-reactivity to chicken proteins of interest is  
494 summarized in Table 1. Rabbit anti-G3BP1 (ab181150), rabbit anti-G3BP2 (ab86135),  
495 rabbit anti-phospho-PKR (ab32036), rabbit anti-phospho-IRF3 (ab76493), and mouse  
496 anti-G3BP1 (ab56574) were purchased from Abcam; rabbit anti-TIAR (#8509), rabbit  
497 anti-PKR (#12297), rabbit anti-eIF2 $\alpha$  (#5324), rabbit anti-phospho-eIF2 $\alpha$  (#3398),  
498 rabbit anti-MDA5 (#5321), rabbit anti-TLR3 (#6961), rabbit anti-MAVS (#24930),  
499 rabbit anti-TARF3 (#61095), rabbit anti-TRAF6 (#8028), rabbit anti-IKK $\epsilon$  (#3416),  
500 rabbit anti-TBK1 (#3504), rabbit anti-phospho-TBK1 (#5483), rabbit anti-IRF3  
501 (#11904), rabbit anti-p65 (#8242), and rabbit anti-phospho-p65 (#3033) were  
502 purchased from Cell Signaling Technology; mouse anti-TIA-1 (sc-116247) was  
503 purchased from Santa Cruz; mouse anti-Flag (F1804) was purchased from Sigma;  
504 rabbit anti- $\beta$ -actin (AC026), goat anti-rabbit IgG (H+L) (AS014), and goat anti-mouse  
505 IgG (H+L) (AS003) conjugated with HRP were from Abclonal; J2 mouse anti-dsRNA  
506 (10010200) was purchased from Scicons. Alexa Fluor goat anti-rabbit-488 (A-11034),

507 Alexa Fluor goat anti-rabbit-594 (A-11037), Alexa Fluor goat anti-mouse-488 (A-  
508 11029), and Alexa Fluor goat anti-mouse-594 (A-11005) were obtained from  
509 Invitrogen. Sodium arsenite (S7400) was purchased from Merck. Poly I:C (31852-29-  
510 6) was from InvivoGen.

511

### 512 **Plasmids construction and transfection**

513 The plasmids encoding IBV nsp2, nsp4, nsp5, nsp6, nsp7, nsp8, nsp9, nsp12, nsp15,  
514 nsp16, 3b, E, 5a, 5b, M and N were generated by amplification of cDNA from IBV  
515 Beaudette-infected Vero cells using corresponding primers (Table 2) and cloned into  
516 PXJ40F. The restriction endonuclease sites for most inserts were *BamH I* and *Xho I*,  
517 while the restriction endonuclease sites for M are *EcoR I* and *Xho I*. The catalytic mutant  
518 plasmids of IBV nsp15 was cloned by using Mut Express II Fast Mutagenesis Kit V2  
519 (Vazyme) as further detailed below. The mutagenesis primers are shown in table 2.

520 Cells were seeded on glass coverslips in a 24 wells cluster (25,000 cells/well). The  
521 indicated plasmids were transfected into cells using Fugene HD (Promega) according  
522 to the manufacturer's handbook. Briefly, 0.5 µg plasmid and 1.5 µl Fugene HD  
523 (m/v=1:3) were diluted and incubated in 0.25 ml OptiMEM (Gibco). After 5 min,  
524 plasmid and Fugene HD were mixed and incubated at room temperature for 15 min,  
525 allowing the formation of lipid-plasmid complex. Finally, the complex was added to  
526 the cultured cells and incubated for 24 h.

527

### 528 **Indirect immunofluorescence and confocal microscopy**

529 Cells were seeded on glass coverslips in a 24 wells cluster (25,000 cells/well) and the  
530 next day were infected with virus or transfected with various plasmids or with poly I:C  
531 (0.25 µg/well). At the indicated time points, cells were treated with heat shock (50°C ,  
532 20 min), sodium arsenite ( 1 mM, 30 min ) , NaCl (200 nM, 50 min), or  
533 cycloheximide (CHX-100 µg/ml, 1 h) , in the latter case DMSO was used as negative  
534 control. Cells were then fixed with 4% paraformaldehyde in PBS for 15 min at room

535 temperature. After three washes with PBS, cells were permeabilized with 0.5% Triton  
536 X-100 in PBS for 15 min and incubated in blocking buffer (3% BSA in PBS) for 1 h.  
537 Cells were incubated with the primary antibody diluted in blocking buffer (as indicated  
538 in Table 1) overnight at 4°C, followed by incubation with Alexa Fluor conjugated  
539 secondary antibody diluted with 1:500 in blocking buffer for 1 h at 37°C. In case of  
540 double staining, cells were incubated with a different unconjugated primary antibody,  
541 followed by incubation with the corresponding conjugated secondary antibody and  
542 incubated as described before. Between and after each incubation step, the cell  
543 monolayer was washed three times with blocking buffer. DAPI was then applied to  
544 stain nuclei for 15 min. Finally, cells were washed once with PBS and examined by  
545 Zeiss LSM880 confocal microscope.

546

#### 547 **Quantitative RT-PCR analysis**

548 Total cellular RNAs were extracted using Trizol reagent (Ambion). cDNAs were  
549 synthesized from 2µg total RNA using oligo(dT) primers and M-MLV reverse  
550 transcriptase system (Promega). cDNA was used as template for quantitative PCR using  
551 a Bio-Rad CFX-96 real time PCR apparatus and SYBR green master mix (Dongsheng  
552 Biotech). PCR conditions were as follow: an initial denaturation at 94°C for 3 min, 40  
553 cycles of 94°C for 15 s, 60°C for 15 s and 72°C for 20 s. The specificity of the amplified  
554 PCR products was confirmed by melting curve analysis after each reaction. The primers  
555 used were: for human *IFN-β*, 5'-GCTTGGATTCTACAAAGAAGCA-3' (F) and 5'-  
556 ATAGATGGTCAATGCGGCGTC-3' (R); for human *IFIT1*, 5'-GCCATTTTCTT  
557 TGCTTCCCCT-3' (F) and 5'-TGCCCTTTTGTAGCCTCC TTG-3' (R); for human *β*-  
558 *actin*, 5'-GATCTGGCACCACCTTCT-3' (F) and 5'-GGGGTGTTGAAGGTC  
559 TCAA-3' (R); for chicken *β-actin*, 5'- CCAGACATCAGGGTGTGATGG-3' (F)  
560 and 5'- CTCCATATCATCCCAGTTGGTGA-3' (R); for chicken *IFN-β*, 5'-  
561 GCTCTCACACCACCTTCTC-3' (F) and 5'- GCTTGCTTCTTGTCTTGCT-3'  
562 (R); for IBV positive strand RNA: 5'-GTCTATCGCCAGGGAAATGTCT-3' (F) and  
563 5'-GTCCTAGTGCTGTACCCTCG-3'(R), which target to 3' untranslated region of

564 virus genome; for IBV negative strand RNA: 5'-GTCCTAGTGCTGTACCCTCG-3'  
565 (F) and 5'-GTCTATCGCCAGGGAAATGTCT-3'(R), which target to 5' sequence  
566 of virus negative strand RNA. The relative expression of each gene or virus RNA was  
567 normalized to *β-actin* mRNA levels and calculated using the  $2^{-\Delta\Delta CT}$  method. All assays  
568 were performed in triplicate and the results are expressed as the means  $\pm$  standard  
569 deviations.

570

### 571 **Western blotting analysis**

572 Cells were lysed in 2x protein loading buffer (20 mM Tris-HCl, 2% SDS, 100 mM DTT,  
573 20% glycerol, 0.016% bromophenol blue). Cell debris was pelleted at 15000  $\times$  g for  
574 10 min and 10  $\mu$ g of the cleared cell lysates were resolved on a 10% SDS-PAGE and  
575 transferred to 0.45  $\mu$ m nitrocellulose membrane (GE life Sciences). Membranes were  
576 blocked in blocking buffer (5% non-fat milk, TBS, 0.1% Tween 20) for 1 h, followed  
577 by incubation with primary antibody diluted in blocking buffer as indicated in S2 table  
578 overnight at 4°C. The membranes were then incubated with secondary antibodies  
579 diluted in blocking buffer as indicated in S2 table for 1 h at room temperature. Between  
580 and after the incubations, membranes were washed three time with washing buffer (0.1%  
581 Tween in TBS). The signals were developed with luminol chemiluminescence reagent  
582 kit (Share-bio) and detected using Tanon 4600 Chemiluminescent Imaging System (Bio  
583 Tanon).

584

### 585 **Quantification of stress granules formation and IRF3 nuclear translocation in** 586 **viral infected cells**

587 For quantification of SGs formation, images from 20 random high-powered fields were  
588 captured. The number of infected cells (IBV-N positive) in the acquired fields was  
589 counted. Cells displaying IBV-N expression and G3BP1 foci were counted as positive  
590 for SGs formation. The relative percentage of infected cells showing SGs formation  
591 was calculated as: (number of cells with G3BP1 granules and IBV-N protein expression  
592 divided by the total number of IBV-N positive cells)  $\times$  100. Similarly, for quantification

593 of nuclear IRF3, 20 random high-powered fields were captured, and the percentage of  
594 cells displaying nuclear IRF3 out of all imaged cells was calculated.

595

#### 596 **Generation of G3BP1/2 knock out cell**

597 Lenti CRISPRv2 was ligated with a pair of guide sequences targeting G3BP1/2 exon 1  
598 which were designed by Zhang'lab (<https://zlab.bio/guide-design-resources>). The  
599 sgRNA of G3BP1 is 5'-CACCGTGTCCTAGACTGCATCTGC-3' and G3BP2 is 5'-  
600 CACCGTACTTTGCTGAATAAAGCTC-3'. The recombinant plasmid (14.5 µg),  
601 together with the packaging plasmids psPAX2 (14.5 µg) and pMD2.G (10 µg), were  
602 transfected into 70% confluence of HEK 293T cells in a 10 cm dish with Fugene  
603 (m/v=1:3) to package lentiviruses. The supernatants containing lentiviruses were  
604 collected at 48 h post-transfection and concentrated by centrifugation (2000 × rpm, 15  
605 min). H1299 cells were then infected with lentiviruses containing 8 µg/ml polybrene.  
606 After 48 h.p.i., puromycin (2 µg/ml) was applied to select for G3BP knockout cells.  
607 The G3BP1 and G3BP2 stably knockout cells were obtained after 5-6 passages and the  
608 absence of G3BP1/2 expression was confirmed by Western blot analysis and genome  
609 sequencing.

610

#### 611 **Construction of recombinant virus rIBV-nsp15-H238A**

612 Plasmids pKTO-IBV-A, pGEM-IBV-B, pXL-IBV-C, pGEM-IBV-D, pGEM-IBV-E  
613 bearing IBV Beaudette fragment A, B, C, D and E covering the full-length genome  
614 (NC\_001451.1) (see table 3) and plasmid pKTO-IBV-N containing N gene and 3'-UTR  
615 are a generous gifts from Prof. Shouguo Fang, Yangtze University. Nsp15-H238A  
616 mutation was introduced by using Mut Express II Fast Mutagenesis Kit V2 on pGEM-  
617 IBV-D (primers sequences were shown in Table 2). The *Bsa I*/*BsmB I* digested products  
618 of pKTO-IBV-A and pGEM-IBV-B were ligated by T4 ligase overnight, and the *Bsa*  
619 *I*/*BsmB I* digested products of C, D and E were ligated overnight. The AB and CDE  
620 were then ligated overnight to get the full-length cDNA genome with nsp15-  
621 H238A(AB+CDE). The full-length cDNA and *EcoRI* digested pKTO-IBV-N were

622 subjected to *in vitro* transcription using T7 transcription kit (Promega), respectively,  
623 and added with cap structure using m7G (5') ppp (5') G RNA cap (New England  
624 biolabs). Next, the capped full-length RNA and IBV-N transcripts dissolved in 400 µl  
625 PBS were co-transfected into Vero cells by electroporation (450 v, 50 µF, 3 mSec,  
626 GenePulser Xcell, BIO-RAD). After 48 h, the supernatant was collected and used to  
627 inoculate new Vero cells. When syncytia appeared, the supernatant was collected again  
628 and passaged on Vero cells for 3 to 5 times. Finally, the virus-containing medium was  
629 collected and sequenced. Viral titer was determined by TCID<sub>50</sub>.

630

### 631 **Viral titer determination**

632 Virus yield in the supernatant of rIBV-nsp15-H238A infected H1299 cells and  
633 G3BP1/2KO H1299 cells were determined by TCID<sub>50</sub> assay. Briefly, the supernatant  
634 was serially diluted in 10-fold and inoculated 70% confluence of H1299 cells in 96 well  
635 plates. The cytopathogenic effect was observed after 4 days infection and the TCID<sub>50</sub>  
636 was calculated by Reed-Muench method.

637

### 638 **Statistical analysis**

639 The statistical analysis was analyzed with Graphpad Prism8 software. The data show  
640 as means ± standard deviation (SD) of three independent experiments. Significance was  
641 determined with Student's test. *P* values < 0.05 were treated as statistically significant.

642

643 **Data availability statement:** All relevant data are within the paper and its Supporting  
644 Information files.

645

### 646 **Acknowledgments**

647 We acknowledge Prof Dingxiang Liu (South China University, China) for supplying  
648 the IBV Beaudette strain and the rabbit anti-IBV-N polyclonal antibody, and for his  
649 excellent scientific advice.

650



651 **Disclosure**

652 The authors have no financial conflict of interest.

653

654 **Grant support**

655 This work was supported by National Natural Science foundation of China (Grant No.  
656 31772724), National Key Research and Development Program (Grant No.  
657 2017YFD0500802), Elite Youth Program of Chinese Academy of Agricultural Science,  
658 and National Natural Science foundation of China (Grant No. 31530074).

659

660 **Author Contributions**

661 **Conceptualization:** Ying Liao, Bo Gao, Xiaoqian Gong, Maria Forlenza, Yingjie Sun

662 **Data Curation :** Ying Liao, Bo Gao, Lei Tan, Weiwei Liu

663 **Formal analysis:** Ying Liao, Bo Gao, Lei Tan

664 **Funding acquisition:** Ying Liao, Chan Ding

665 **Investigation:** Bo Gao, Xiaoqian Gong, Wenlian Weng

666 **Methodology:** Shouguo Fang

667 **Project Administration:** Ying Liao, Chunchun Meng, Xusheng Qiu

668 **Resource:** Shouguo Fang, Chunchun Meng

669 **Software:** Cuiping Song, Weiwei Liu

670 **Validation:** Ying Liao, Yingjie Sun, Chunchun Meng

671 **Visualization:** Yingjie Sun, Xusheng Qiu, Cuiping Song

672 **Supervision :** Ying Liao, Chan Ding, Maria Forlenza, Yingjie Sun

673 **Writing-original draft:** Bo Gao, Ying Liao

674 **Writing-review & editing:** Ying Liao, Maria Forlenza

675

676 **Correspondence address**

677 Address correspondence and reprint requests to Prof Ying Liao, Waterfowl virus  
678 infectious diseases, Shanghai Veterinary Research Institute, Chinese Academy of

679 Agricultural Sciences, Shanghai, 200241. P. R. China

680 Email: liaoying@shvri.ac.cn

681

## 682 **Abbreviations**

683 Abbreviations used in this article: IBV, infectious bronchitis virus; SG, stress granule;  
684 TLRs, Toll like receptors; RLRs, RIG-I like receptors; IFN, interferon; IRF3/7,  
685 interferon regulatory factor 3/7; PKR, double-stranded RNA-dependent protein kinase  
686 R; PERK, PKR-like endoplasmic reticulum kinase; GCN2, general control  
687 nonderepressible protein 2; HRI, heme-regulated inhibitor kinase; G3BP1/2, Ras  
688 GTPase-activating protein-binding protein 1/2; TIA-1, T cell-restricted intracellular  
689 antigen 1; TIAR, TIA-1-related protein; PABP1, poly(A) binding protein 1; RTC,  
690 replication and transcription complex; MEX3C, RNA-binding E3 ubiquitin protein  
691 ligase; Riplet, E3 ubiquitin protein ligase RNF135; DHX36, DEAH box protein 36;  
692 NEMO, NF-kappa-B essential modulator; ARS, sodium arsenite; MOI, multiplicity of  
693 infection; RT-PCR, reverse transcription-PCR; siRNA, small interfering RNA; h.p.i,  
694 hours post infection; ISG, interferon stimulated gene; IFIT1, interferon induced protein  
695 with tetratricopeptide repeats 1.

696

## 697 **Figure legend**

698 **Fig 1. IBV prevents SGs formation in the majority of infected cells.** (A-C) Vero,  
699 H1299, and DF-1 cells were infected with IBV Beaudette strain at an MOI of 1 or mock  
700 infected. At the indicated time points, cells were subjected to immunostaining. Infected  
701 cells (red) were identified using a rabbit anti-N protein, SGs (green) with a (cross-  
702 reacting) mouse anti-G3BP1 and cell nuclei with DAPI (blue). The SGs positive cells  
703 and IBV positive cells in 20 random fields were counted. Bars indicate means  $\pm$ SD of  
704 the percentage of IBV infected cells that were also positive for the presence of SGs.  
705 The experiment was performed in triplicate. (D-E) Vero and H1299 cells were infected  
706 with IBV as described in A-C. At 20 h.p.i., immunostaining was used to visualize the  
707 position of the structural components of SGs using anti-G3BP1 (red) and anti-TIAR

708 (green) antibodies. The enlargement of the inset confirms their co-localization in  
709 cytoplasmic granules. Scale bars: 10  $\mu$ m.

710

711 **Fig 2. PKR and eIF2 $\alpha$  phosphorylation during IBV infection.** (A-B) H1299 and  
712 Vero cells were infected with IBV at a MOI of 1 or mock infected. Cells were harvested  
713 at the indicated time points and processed for western blot analysis using 10  $\mu$ g total  
714 protein per lane. p-PKR, PKR, p-eIF2 $\alpha$ , eIF2 $\alpha$ , G3BP1, TIA-1, and IBV-N were  
715 detected with corresponding antibodies.  $\beta$ -actin was probed as a loading control.

716

717 **Fig 3. IBV abrogates eIF2 $\alpha$ -dependent and -independent formation of SGs.** (A-C)  
718 H1299 and DF-1 cells were infected with IBV an MOI of 1. At 20 h.p.i., cells received  
719 a heat shock treatment (50°C for 20 min) or 1 mM sodium arsenite for 30 min, or 200  
720 mM NaCl for 50 min, followed by immunostaining. Infected cells were detected with  
721 anti-N antibody (red), SGs with anti-G3BP1 (green) and cell nuclei with DAPI (blue).  
722 Shown are representative images out of three independent experiments. Scale bars: 10  
723  $\mu$ m. (D-E) H1299 cells were mock infected or infected with IBV and treated with heat  
724 shock or sodium arsenite as describe in A and B. At 20 h.p.i., cell lysates (10  $\mu$ g per  
725 lane) were subjected to western blotting analysis to detect p-eIF2 $\alpha$ , eIF2 $\alpha$ , IBV N, and  
726  $\beta$ -actin.

727

728 **Fig 4. IBV nsp15 suppresses the formation of SGs.** (A) Schematic diagram of the  
729 proteins encoded by IBV. (B) H1299 cells were transfected with plasmids encoding  
730 Flag-tagged IBV proteins or with vector PXJ40F. At 24 h post-transfection, cells  
731 received a heat shock treatment at 50°C for 20 min. IBV proteins were stained with anti-  
732 Flag antibody (red) and SGs were detected with anti-G3BP1 (green). Cell nuclei were  
733 stained with DAPI (blue). Shown are representative images out of three independent  
734 experiments. Scale bars: 10  $\mu$ m.

735

736 **Fig 5. IBV nsp15 endoribonuclease activity is required for suppression of eIF2 $\alpha$ -**

737 **dependent and -independent formation of SGs.** (A-C) H1299 cells were transfected  
738 with plasmids encoding IBV nsp15, nsp15-H223A, or nsp15-H238A, respectively. At  
739 24 h post-transfection, cells received a heat shock treatment (50°C for 20 min), or 1 mM  
740 sodium arsenite for 30 min, or 200 mM NaCl for 50 min. Nsp15, nsp15-H223A, and  
741 nsp15-H238A were detected with anti-Flag antibody (red) and G3BP1 was detected  
742 with anti-G3BP1 (green). Cell nuclei were stained with DAPI (blue). Shown are  
743 representative images out of three independent experiments. Scale bars: 10  $\mu$ m. (D)  
744 H1299 cells were transfected with plasmids encoding IBV nsp15 or with vector PXJ40F.  
745 At 24 h post-transfection, cells received a heat shock treatment (50°C for 20 min), or 1  
746 mM sodium arsenite for 30 min. Cell lysates (10  $\mu$ g/lane) were subjected to Western  
747 blot analysis, to check the expression of Flag-nsp15 and to determine the levels of  
748 phospho-eIF2 $\alpha$ , eIF2 $\alpha$ , G3BP1, TIA-1, and  $\beta$ -actin. Shown are representative bots out  
749 of three independent experiments.

750

751 **Fig 6. Nsp15-defective virus rIBV-nsp15-H238A induces canonical SGs by**  
752 **activation of PKR.** (A) Schematic diagram of the construction of rIBV-nsp15-H238A  
753 as described in the methods section. (B) H1299 cells and DF-1 cells were infected with  
754 IBV or rIBV-nsp15-H238A at a MOI of 1 for 20 h followed by immunostaining.  
755 Infected cells were identified with anti-IBN-N (red) and the SGs with anti-G3BP1  
756 (green) antibody. Cell nuclei were stained with DAPI (blue). The bar graph on the right  
757 side indicate the mean + SD of the percentage of infected cells showing the presence of  
758 SGs was calculated over 20 random fields acquired for each condition. Values are  
759 representative of one out of three independent experiments. (C) H1299 cells were  
760 infected with rIBV-nsp15-H238A for 20 h and treated with 100  $\mu$ g/ml of CHX for 1 h  
761 or with an equivalent volume of DMSO as control, followed by immunostaining with  
762 anti-G3BP1 or anti-G3BP2 antibodies. The bar graph on the right shows the percentage  
763 of SGs positive cells out of the total cells imaged. Values are representative of one out  
764 of three independent experiments. *P* values were calculated by Student's test. \*\*\*\*, *P*  
765 < 0.0001 (highly significant). Scale bars: 10  $\mu$ m.

766

767 **Fig 7. Nsp15-defective virus rIBV-nsp15-H238A strongly activates PKR by**  
768 **promoting dsRNA accumulation and eventually stimulates IFN response.** (A)

769 H1299 cells were mock infected or infected with IBV or rIBV-nsp15-H238A of 1 MOI  
770 for 20 h. Cells were lysed for western blotting analysis to detect the level of p-PKR,  
771 PKR, p-eIF2 $\alpha$ , eIF2 $\alpha$ , IBV-S, IBV-M, IBV-N, and  $\beta$ -actin. (B) H1299 and DF-1 cells  
772 were infected with IBV or rIBV-nsp15-H238A for 20 h respectively. Total RNA was  
773 extracted and subjected to quantitative RT-PCR to determine the transcription of *IFN-*  
774  *$\beta$* . Values are representative of three independent experiments. *P* values were calculated  
775 by Student's test. \*\*, *P* < 0.01; \*\*\*, *P* < 0.001. (C-D) H1299 and DF-1 cells were  
776 infected with IBV or rIBV-nsp15-H238A for 20 h followed by immunostaining.  
777 dsRNA (red) was detected with J2 antibody and G3BP1 or IBV-N (green) were  
778 determined with corresponding antibodies. Images shown are representative of three  
779 independent experiments. Scale bars: 10  $\mu$ m.

780

781 **Fig 8. Depletion of SGs scaffold proteins reduces rIBV-nsp15-H238A induced**  
782 **IRF3-IFN- $\beta$  signaling.** (A) H1299 or H1299-G3BP1/2<sup>-/-</sup> cells were treated with 1 mM

783 sodium arsenite for 30 min or infected with rIBV-nsp15-H238A for 20 h, followed by  
784 immunostaining with anti-G3BP1 (red) and anti-TIAR (green). (B) H1299 cells and  
785 H1299-G3BP1/2<sup>-/-</sup> cells were mock infected or infected with rIBV-nsp15-H238A for  
786 20 h. Cell lysates were analyzed by western blot to detect G3BP1, G3BP2, p-TBK1,  
787 TBK1, p-IRF3, IRF3, p-p65, p65, IBV-S, IBV-M, IBV-N, and actin. (C) H1299 cells  
788 and H1299-G3BP1/2<sup>-/-</sup> cells were inoculated with rIBV-nsp15-H238A for 20 h and the  
789 induction of *IFN- $\beta$*  and *IFIT1* was quantified by quantitative RT-PCR. The bar graph  
790 shows means  $\pm$  SD of the levels of *IFN- $\beta$*  or *IFIT1*. (D) The supernatant from rIBV-  
791 nsp15-H238A infected H1299 and H1299-G3BP1/2<sup>-/-</sup> cells was collected at 20 h.p.i.  
792 and virus titers (TCID<sub>50</sub>) calculated. The bar graph shows means  $\pm$  SD of three  
793 independent determination of viral titer. Data are representative of three independent  
794 experiments. \*, *P* < 0.1; \*\*, *P* < 0.01.

795

796 **Fig 9. Depletion of SGs scaffold proteins reduces poly I:C induced IRF3-IFN- $\beta$**

797 **signaling.** (A-C) H1299 cells and H1299-G3BP1/2<sup>-/-</sup> cells were transfected with poly

798 I:C (1  $\mu$ g/ml) for 6 h. The levels of G3BP1, G3BP2, p-TBK1, TBK1, p-IRF3, IRF3,

799 and actin were determined by Western blot analysis (A), the nuclear translocation of

800 IRF3 was examined by immunostaining (B), and the induction of *IFN- $\beta$*  and *IFIT1* was

801 quantified by quantitative RT-PCR (C). The bar graph shows means  $\pm$  SD of the

802 percentage of nuclear IRF3 positive cells out of the total cells imaged in (B) and the

803 relative expression levels of *IFN- $\beta$*  or *IFIT1* (C). Data are representative of three

804 independent experiments. \*\*\*,  $P < 0.001$ ; \*\*,  $P < 0.01$ .

805

806 **Fig 10. PRRs and innate immunity signaling intermediates aggregate to IBV-**

807 **induced SGs.** (A-B) H1299 cells were mock infected or infected with IBV followed

808 by immunostaining at 20 h.p.i.. Anti-G3BP1 (red) was used to monitor SGs formation,

809 and PKR, MDA5, TLR3, MAVS, TRAF3, TRAF6, TBK1, IKK $\epsilon$  (green) were detected

810 with corresponding antibodies. Cell nuclei were stained with DAPI (blue). Shown are

811 representative images out of three independent experiments. Scale bars, 10  $\mu$ m.

812

813 **Fig 11. The working model of inhibition of anti-viral stress granule formation by**

814 **infectious bronchitis virus nsp15.** 1) IBV genome replication and mRNA

815 transcription produce dsRNA. Nsp15 functions to cleave viral dsRNA and reduce its

816 accumulation. Thus, virus avoids activation of PKR and impedes SGs formation. 2)

817 Absence of nsp15 endoribonuclease activity in rIBV-nsp15-H238A, results in the

818 accumulation of viral dsRNA, activation of PKR, and subsequent formation of SGs.

819 The aggregation of PRRs and signaling intermediates to SGs facilitates the signaling

820 transduction and IRF3 activation, finally inducing the expression of *IFN- $\beta$* . Production

821 of IFN- $\beta$  in turn, effectively limits rIBV-nsp15-H238A proliferation. 3) In parallel,

822 nsp15 may also cleave host mRNA or interfere with host mRNA nuclear export or

823 processing thereby preventing the assembly of SGs or promoting their disassembly.

824

825

826

827

828

829

830

831

832 **Reference**

833 1. Sparrer KM, Gack MU. Intracellular detection of viral nucleic acids. Current opinion in

834 microbiology. 2015;26:1-9.

835 2. Garcia MA, Meurs EF, Esteban M. The dsRNA protein kinase PKR: virus and cell control.

836 Biochimie. 2007;89(6-7):799-811. doi: 10.1016/j.biochi.2007.03.001. PubMed PMID: 17451862.

837 3. Vattem KM, Staschke KA, Zhu S, Wek RC. Inhibitory sequences in the N-terminus of the

838 double-stranded-RNA-dependent protein kinase, PKR, are important for regulating

839 phosphorylation of eukaryotic initiation factor 2alpha (eIF2alpha). Eur J Biochem.

840 2001;268(4):1143-53. Epub 2001/02/17. doi: 10.1046/j.1432-1327.2001.01979.x. PubMed

841 PMID: 11179981.

842 4. Jackson RJ, Hellen CU, Pestova TV. The mechanism of eukaryotic translation initiation

843 and principles of its regulation. Nat Rev Mol Cell Biol. 2010;11(2):113-27. Epub 2010/01/23.

844 doi: 10.1038/nrm2838. PubMed PMID: 20094052; PubMed Central PMCID: PMC4461372.

845 5. Lu L, Han AP, Chen JJ. Translation initiation control by heme-regulated eukaryotic

846 initiation factor 2alpha kinase in erythroid cells under cytoplasmic stresses. Mol Cell Biol.

847 2001;21(23):7971-80. Epub 2001/11/02. doi: 10.1128/MCB.21.23.7971-7980.2001. PubMed

- 848 PMID: 11689689; PubMed Central PMCID: PMCPMC99965.
- 849 6. McEwen E, Kedersha N, Song B, Scheuner D, Gilks N, Han A, et al. Heme-regulated  
850 inhibitor kinase-mediated phosphorylation of eukaryotic translation initiation factor 2 inhibits  
851 translation, induces stress granule formation, and mediates survival upon arsenite exposure. *J*  
852 *Biol Chem.* 2005;280(17):16925-33. Epub 2005/02/03. doi: 10.1074/jbc.M412882200. PubMed  
853 PMID: 15684421.
- 854 7. Harding HP, Zhang Y, Bertolotti A, Zeng H, Ron D. Perk is essential for translational  
855 regulation and cell survival during the unfolded protein response. *Mol Cell.* 2000;5(5):897-904.  
856 Epub 2000/07/06. doi: 10.1016/s1097-2765(00)80330-5. PubMed PMID: 10882126.
- 857 8. Wek SA, Zhu S, Wek RC. The histidyl-tRNA synthetase-related sequence in the eIF-2  
858 alpha protein kinase GCN2 interacts with tRNA and is required for activation in response to  
859 starvation for different amino acids. *Mol Cell Biol.* 1995;15(8):4497-506. Epub 1995/08/01. doi:  
860 10.1128/mcb.15.8.4497. PubMed PMID: 7623840; PubMed Central PMCID: PMCPMC230689.
- 861 9. Deng J, Harding HP, Raught B, Gingras AC, Berlanga JJ, Scheuner D, et al. Activation of  
862 GCN2 in UV-irradiated cells inhibits translation. *Curr Biol.* 2002;12(15):1279-86. Epub  
863 2002/08/15. doi: 10.1016/s0960-9822(02)01037-0. PubMed PMID: 12176355.
- 864 10. McCormick C, Khaperskyy DA. Translation inhibition and stress granules in the antiviral  
865 immune response. *Nature reviews Immunology.* 2017;17(10):647-60. doi: 10.1038/nri.2017.63.  
866 PubMed PMID: 28669985.
- 867 11. Kedersha NL, Gupta M, Li W, Miller I, Anderson P. RNA-binding proteins TIA-1 and TIAR  
868 link the phosphorylation of eIF-2 alpha to the assembly of mammalian stress granules. *J Cell*  
869 *Biol.* 1999;147(7):1431-42. Epub 1999/12/30. doi: 10.1083/jcb.147.7.1431. PubMed PMID:



- 870 10613902; PubMed Central PMCID: PMCPMC2174242.
- 871 12. Kedersha N, Cho MR, Li W, Yacono PW, Chen S, Gilks N, et al. Dynamic shuttling of TIA-1  
872 accompanies the recruitment of mRNA to mammalian stress granules. *J Cell Biol.*  
873 2000;151(6):1257-68. Epub 2000/12/21. doi: 10.1083/jcb.151.6.1257. PubMed PMID:  
874 11121440; PubMed Central PMCID: PMCPMC2190599.
- 875 13. Matsuki H, Takahashi M, Higuchi M, Makokha GN, Oie M, Fujii M. Both G3BP1 and G3BP2  
876 contribute to stress granule formation. *Genes Cells.* 2013;18(2):135-46. Epub 2013/01/03. doi:  
877 10.1111/gtc.12023. PubMed PMID: 23279204.
- 878 14. Lee EK. Post-translational modifications of RNA-binding proteins and their roles in RNA  
879 granules. *Curr Protein Pept Sci.* 2012;13(4):331-6. Epub 2012/06/20. doi:  
880 10.2174/138920312801619411. PubMed PMID: 22708487.
- 881 15. Protter DS, Parker R. Principles and Properties of Stress Granules. *Trends Cell Biol.*  
882 2016;26(9):668-79. doi: 10.1016/j.tcb.2016.05.004. PubMed PMID: 27289443; PubMed  
883 Central PMCID: PMC4993645.
- 884 16. Yamasaki S, Anderson P. Reprogramming mRNA translation during stress. *Current*  
885 *opinion in cell biology.* 2008;20(2):222-6. doi: 10.1016/j.ceb.2008.01.013. PubMed PMID:  
886 18356035; PubMed Central PMCID: PMC2841789.
- 887 17. Streicher F, Jouvenet N. Stimulation of Innate Immunity by Host and Viral RNAs. *Trends*  
888 *Immunol.* 2019;40(12):1134-48. Epub 2019/11/19. doi: 10.1016/j.it.2019.10.009. PubMed  
889 PMID: 31735513.
- 890 18. Rasmussen SB, Reinert LS, Paludan SR. Innate recognition of intracellular pathogens:  
891 detection and activation of the first line of defense. *APMIS.* 2009;117(5-6):323-37. Epub

- 892 2009/04/30. doi: 10.1111/j.1600-0463.2009.02456.x. PubMed PMID: 19400860.
- 893 19. Chattopadhyay S, Sen GC. dsRNA-activation of TLR3 and RLR signaling: gene induction-  
894 dependent and independent effects. *J Interferon Cytokine Res.* 2014;34(6):427-36. Epub  
895 2014/06/07. doi: 10.1089/jir.2014.0034. PubMed PMID: 24905199; PubMed Central PMCID:  
896 PMCPMC4046345.
- 897 20. Kell AM, Gale M, Jr. RIG-I in RNA virus recognition. *Virology.* 2015;479-480:110-21. doi:  
898 10.1016/j.virol.2015.02.017. PubMed PMID: 25749629; PubMed Central PMCID:  
899 PMC4424084.
- 900 21. Loo YM, Gale M, Jr. Immune signaling by RIG-I-like receptors. *Immunity.* 2011;34(5):680-  
901 92. doi: 10.1016/j.immuni.2011.05.003. PubMed PMID: 21616437; PubMed Central PMCID:  
902 PMC3177755.
- 903 22. Yoneyama M, Onomoto K, Jogi M, Akaboshi T, Fujita T. Viral RNA detection by RIG-I-like  
904 receptors. *Current opinion in immunology.* 2015;32:48-53. doi: 10.1016/j.coi.2014.12.012.  
905 PubMed PMID: 25594890.
- 906 23. Schneider WM, Chevillotte MD, Rice CM. Interferon-stimulated genes: a complex web of  
907 host defenses. *Annu Rev Immunol.* 2014;32:513-45. doi: 10.1146/annurev-immunol-032713-  
908 120231. PubMed PMID: 24555472; PubMed Central PMCID: PMC4313732.
- 909 24. Onomoto K, Jogi M, Yoo JS, Narita R, Morimoto S, Takemura A, et al. Critical role of an  
910 antiviral stress granule containing RIG-I and PKR in viral detection and innate immunity. *PloS*  
911 *one.* 2012;7(8):e43031. doi: 10.1371/journal.pone.0043031. PubMed PMID: 22912779;  
912 PubMed Central PMCID: PMC3418241.
- 913 25. Khaperskyy DA, Hatchette TF, McCormick C. Influenza A virus inhibits cytoplasmic stress

- 914 granule formation. *FASEB J.* 2012;26(4):1629-39. Epub 2011/12/29. doi: 10.1096/fj.11-196915.
- 915 PubMed PMID: 22202676.
- 916 26. Simpson-Holley M, Kedersha N, Dower K, Rubins KH, Anderson P, Hensley LE, et al.
- 917 Formation of antiviral cytoplasmic granules during orthopoxvirus infection. *J Virol.*
- 918 2011;85(4):1581-93. doi: 10.1128/JVI.02247-10. PubMed PMID: 21147913; PubMed Central
- 919 PMCID: PMC3028896.
- 920 27. Nelson EV, Schmidt KM, DeFlube LR, Doganay S, Banadyga L, Olejnik J, et al. Ebola Virus
- 921 Does Not Induce Stress Granule Formation during Infection and Sequesters Stress Granule
- 922 Proteins within Viral Inclusions. *Journal of virology.* 2016;90(16):7268-84. doi:
- 923 10.1128/JVI.00459-16. PubMed PMID: 27252530; PubMed Central PMCID: PMC4984654.
- 924 28. Visser LJ, Medina GN, Rabouw HH, de Groot RJ, Langereis MA, de Los Santos T, et al.
- 925 Foot-and-Mouth Disease Virus Leader Protease Cleaves G3BP1 and G3BP2 and Inhibits
- 926 Stress Granule Formation. *Journal of virology.* 2019;93(2). Epub 2018/11/09. doi:
- 927 10.1128/JVI.00922-18. PubMed PMID: 30404792; PubMed Central PMCID:
- 928 PMCPMC6321903.
- 929 29. Ye X, Pan T, Wang D, Fang L, Ma J, Zhu X, et al. Foot-and-Mouth Disease Virus
- 930 Counteracts on Internal Ribosome Entry Site Suppression by G3BP1 and Inhibits G3BP1-
- 931 Mediated Stress Granule Assembly via Post-Translational Mechanisms. *Front Immunol.*
- 932 2018;9:1142. doi: 10.3389/fimmu.2018.01142. PubMed PMID: 29887867; PubMed Central
- 933 PMCID: PMC5980976.
- 934 30. Visser LJ, Langereis MA, Rabouw HH, Wahedi M, Muntjewerff EM, de Groot RJ, et al.
- 935 Essential Role of Enterovirus 2A Protease in Counteracting Stress Granule Formation and the

- 936 Induction of Type I Interferon. *Journal of virology*. 2019;93(10). Epub 2019/03/15. doi:  
937 10.1128/JVI.00222-19. PubMed PMID: 30867299; PubMed Central PMCID:  
938 PMCPMC6498061.
- 939 31. Yang X, Hu Z, Fan S, Zhang Q, Zhong Y, Guo D, et al. Picornavirus 2A protease regulates  
940 stress granule formation to facilitate viral translation. *PLoS Pathog*. 2018;14(2):e1006901.  
941 Epub 2018/02/08. doi: 10.1371/journal.ppat.1006901. PubMed PMID: 29415027; PubMed  
942 Central PMCID: PMCPMC5819834.
- 943 32. Rabouw HH, Langereis MA, Knaap RC, Dalebout TJ, Canton J, Sola I, et al. Middle East  
944 Respiratory Coronavirus Accessory Protein 4a Inhibits PKR-Mediated Antiviral Stress  
945 Responses. *PLoS Pathog*. 2016;12(10):e1005982. doi: 10.1371/journal.ppat.1005982.  
946 PubMed PMID: 27783669; PubMed Central PMCID: PMC5081173.
- 947 33. Nakagawa K, Narayanan K, Wada M, Makino S. Inhibition of Stress Granule Formation by  
948 Middle East Respiratory Syndrome Coronavirus 4a Accessory Protein Facilitates Viral  
949 Translation, Leading to Efficient Virus Replication. *Journal of virology*. 2018;92(20). Epub  
950 2018/08/03. doi: 10.1128/JVI.00902-18. PubMed PMID: 30068649.
- 951 34. Raaben M, Groot Koerkamp MJ, Rottier PJ, de Haan CA. Mouse hepatitis coronavirus  
952 replication induces host translational shutoff and mRNA decay, with concomitant formation of  
953 stress granules and processing bodies. *Cellular microbiology*. 2007;9(9):2218-29. doi:  
954 10.1111/j.1462-5822.2007.00951.x. PubMed PMID: 17490409.
- 955 35. Sola I, Galan C, Mateos-Gomez PA, Palacio L, Zuniga S, Cruz JL, et al. The polypyrimidine  
956 tract-binding protein affects coronavirus RNA accumulation levels and relocalizes viral RNAs  
957 to novel cytoplasmic domains different from replication-transcription sites. *J Virol*.

- 958 2011;85(10):5136-49. doi: 10.1128/JVI.00195-11. PubMed PMID: 21411518; PubMed Central  
959 PMCID: PMC3126201.
- 960 36. Emmott E, Munday D, Bickerton E, Britton P, Rodgers MA, Whitehouse A, et al. The  
961 cellular interactome of the coronavirus infectious bronchitis virus nucleocapsid protein and  
962 functional implications for virus biology. *Journal of virology*. 2013;87(17):9486-500. doi:  
963 10.1128/JVI.00321-13. PubMed PMID: 23637410; PubMed Central PMCID: PMC3754094.
- 964 37. Brownsword MJ, Doyle N, Brocard M, Locker N, Maier HJ. Infectious Bronchitis Virus  
965 Regulates Cellular Stress Granule Signaling. *Viruses*. 2020;12(5). Epub 2020/05/20. doi:  
966 10.3390/v12050536. PubMed PMID: 32422883.
- 967 38. Narayanan K, Ramirez SI, Lokugamage KG, Makino S. Coronavirus nonstructural protein  
968 1: Common and distinct functions in the regulation of host and viral gene expression. *Virus Res*.  
969 2015;202:89-100. Epub 2014/11/29. doi: 10.1016/j.virusres.2014.11.019. PubMed PMID:  
970 25432065; PubMed Central PMCID: PMC4444399.
- 971 39. Mielech AM, Kilianski A, Baez-Santos YM, Mesecar AD, Baker SC. MERS-CoV papain-  
972 like protease has deISGylating and deubiquitinating activities. *Virology*. 2014;450-451:64-70.  
973 doi: 10.1016/j.virol.2013.11.040. PubMed PMID: 24503068; PubMed Central PMCID:  
974 PMC3957432.
- 975 40. Li SW, Wang CY, Jou YJ, Huang SH, Hsiao LH, Wan L, et al. SARS Coronavirus Papain-  
976 Like Protease Inhibits the TLR7 Signaling Pathway through Removing Lys63-Linked  
977 Polyubiquitination of TRAF3 and TRAF6. *International journal of molecular sciences*.  
978 2016;17(5). doi: 10.3390/ijms17050678. PubMed PMID: 27164085; PubMed Central PMCID:  
979 PMC4881504.

- 980 41. Chen S, Tian J, Li Z, Kang H, Zhang J, Huang J, et al. Feline Infectious Peritonitis Virus  
981 Nsp5 Inhibits Type I Interferon Production by Cleaving NEMO at Multiple Sites. *Viruses*.  
982 2019;12:43. doi: 10.3390/v12010043.
- 983 42. Zhu X, Fang L, Wang D, Yang Y, Chen J, Ye X, et al. Porcine deltacoronavirus nsp5  
984 inhibits interferon-beta production through the cleavage of NEMO. *Virology*. 2017;502:33-8. doi:  
985 10.1016/j.virol.2016.12.005. PubMed PMID: 27984784.
- 986 43. Shi P, Su Y, Li R, Liang Z, Dong S, Huang J. PEDV nsp16 negatively regulates innate  
987 immunity to promote viral proliferation. *Virus Res*. 2019;265:57-66. Epub 2019/03/09. doi:  
988 10.1016/j.virusres.2019.03.005. PubMed PMID: 30849413.
- 989 44. Kindler E, Gil-Cruz C, Spanier J, Li Y, Wilhelm J, Rabouw HH, et al. Early endonuclease-  
990 mediated evasion of RNA sensing ensures efficient coronavirus replication. *PLoS Pathog*.  
991 2017;13(2):e1006195. Epub 2017/02/06. doi: 10.1371/journal.ppat.1006195. PubMed PMID:  
992 28158275; PubMed Central PMCID: PMC5310923.
- 993 45. Cavanagh D. Coronavirus avian infectious bronchitis virus. *Veterinary research*.  
994 2007;38(2):281-97. doi: 10.1051/vetres:2006055. PubMed PMID: 17296157.
- 995 46. Zhang Q, Sharma NR, Zheng ZM, Chen M. Viral Regulation of RNA Granules in Infected  
996 Cells. *Virologica Sinica*. 2019;34(2):175-91. Epub 2019/05/01. doi: 10.1007/s12250-019-  
997 00122-3. PubMed PMID: 31037644; PubMed Central PMCID: PMC6513825.
- 998 47. Poblete-Duran N, Prades-Perez Y, Vera-Otarola J, Soto-Rifo R, Valiente-Echeverria F.  
999 Who Regulates Whom? An Overview of RNA Granules and Viral Infections. *Viruses*. 2016;8(7).  
1000 doi: 10.3390/v8070180. PubMed PMID: 27367717; PubMed Central PMCID: PMC4974515.
- 1001 48. Anderson P, Kedersha N. Stressful initiations. *J Cell Sci*. 2002;115(Pt 16):3227-34. Epub

- 1002 2002/07/26. PubMed PMID: 12140254.
- 1003 49. Kedersha N, Panas MD, Achorn CA, Lyons S, Tisdale S, Hickman T, et al. G3BP-Caprin1-  
1004 USP10 complexes mediate stress granule condensation and associate with 40S subunits. The  
1005 Journal of cell biology. 2016;212(7):845-60. Epub 2016/03/30. doi: 10.1083/jcb.201508028.  
1006 PubMed PMID: 27022092; PubMed Central PMCID: PMC4810302.
- 1007 50. Deng X, Hackbart M, Mettelman RC, O'Brien A, Mielech AM, Yi G, et al. Coronavirus  
1008 nonstructural protein 15 mediates evasion of dsRNA sensors and limits apoptosis in  
1009 macrophages. Proceedings of the National Academy of Sciences of the United States of  
1010 America. 2017;114(21):E4251-E60. Epub 2017/05/10. doi: 10.1073/pnas.1618310114.  
1011 PubMed PMID: 28484023; PubMed Central PMCID: PMC48190.
- 1012 51. Deng X, Baker SC. An "Old" protein with a new story: Coronavirus endoribonuclease is  
1013 important for evading host antiviral defenses. Virology. 2018. doi: 10.1016/j.virol.2017.12.024.  
1014 PubMed PMID: 29307596.
- 1015 52. Kint J, Fernandez-Gutierrez M, Maier HJ, Britton P, Langereis MA, Koumans J, et al.  
1016 Activation of the chicken type I interferon response by infectious bronchitis coronavirus. J Virol.  
1017 2015;89(2):1156-67. Epub 2014/11/08. doi: 10.1128/JVI.02671-14. PubMed PMID: 25378498;  
1018 PubMed Central PMCID: PMC4300645.
- 1019 53. Brownsword M, Doyle N, Brocard M, Locker N, Maier H. Infectious bronchitis virus  
1020 modulates cellular stress granule signalling. Access Microbiology. 2019;1(1A).
- 1021 54. Angelini MM, Akhlaghpour M, Neuman BW, Buchmeier MJ. Severe acute respiratory  
1022 syndrome coronavirus nonstructural proteins 3, 4, and 6 induce double-membrane vesicles.  
1023 mBio. 2013;4(4). Epub 2013/08/15. doi: 10.1128/mBio.00524-13. PubMed PMID: 23943763;

- 1024 PubMed Central PMCID: PMCPMC3747587.
- 1025 55. Maier HJ, Hawes PC, Cottam EM, Mantell J, Verkade P, Monaghan P, et al. Infectious  
1026 bronchitis virus generates spherules from zippered endoplasmic reticulum membranes. *mBio*.  
1027 2013;4(5):e00801-13. doi: 10.1128/mBio.00801-13. PubMed PMID: 24149513; PubMed  
1028 Central PMCID: PMC3812713.
- 1029 56. Sola I, Almazan F, Zuniga S, Enjuanes L. Continuous and Discontinuous RNA Synthesis  
1030 in Coronaviruses. *Annu Rev Virol*. 2015;2(1):265-88. doi: 10.1146/annurev-virology-100114-  
1031 055218. PubMed PMID: 26958916.
- 1032 57. Madhugiri R, Fricke M, Marz M, Ziebuhr J. Coronavirus cis-Acting RNA Elements.  
1033 *Advances in virus research*. 2016;96:127-63. Epub 2016/10/08. doi:  
1034 10.1016/bs.aivir.2016.08.007. PubMed PMID: 27712622.
- 1035 58. Sola I, Mateos-Gomez PA, Almazan F, Zuniga S, Enjuanes L. RNA-RNA and RNA-protein  
1036 interactions in coronavirus replication and transcription. *RNA biology*. 2011;8(2):237-48. Epub  
1037 2011/03/08. doi: 10.4161/rna.8.2.14991. PubMed PMID: 21378501; PubMed Central PMCID:  
1038 PMCPMC3230552.
- 1039 59. Sethna PB, Hofmann MA, Brian DA. Minus-strand copies of replicating coronavirus  
1040 mRNAs contain antileaders. *J Virol*. 1991;65(1):320-5. Epub 1991/01/01. PubMed PMID:  
1041 1985203; PubMed Central PMCID: PMCPMC240520.
- 1042 60. Bhardwaj K, Guarino L, Kao CC. The severe acute respiratory syndrome coronavirus  
1043 Nsp15 protein is an endoribonuclease that prefers manganese as a cofactor. *Journal of virology*.  
1044 2004;78(22):12218-24. Epub 2004/10/28. doi: 10.1128/JVI.78.22.12218-12224.2004. PubMed  
1045 PMID: 15507608; PubMed Central PMCID: PMCPMC525082.



- 1046 61. Cao J, Wu CC, Lin TL. Turkey coronavirus non-structure protein NSP15--an  
1047 endoribonuclease. *Intervirology*. 2008;51(5):342-51. Epub 2008/11/22. doi:  
1048 10.1159/000175837. PubMed PMID: 19023218.
- 1049 62. Snijder EJ, Decroly E, Ziebuhr J. The Nonstructural Proteins Directing Coronavirus RNA  
1050 Synthesis and Processing. *Advances in virus research*. 2016;96:59-126. doi:  
1051 10.1016/bs.aivir.2016.08.008. PubMed PMID: 27712628.
- 1052 63. Kang H, Bhardwaj K, Li Y, Palaninathan S, Sacchettini J, Guarino L, et al. Biochemical  
1053 and genetic analyses of murine hepatitis virus Nsp15 endoribonuclease. *Journal of virology*.  
1054 2007;81(24):13587-97. Epub 2007/09/28. doi: 10.1128/JVI.00547-07. PubMed PMID:  
1055 17898055; PubMed Central PMCID: PMCPMC2168834.
- 1056 64. Ulferts R, Ziebuhr J. Nidovirus ribonucleases: structures and functions in viral replication.  
1057 *RNA biology*. 2011;8(2):295-304.
- 1058 65. Hackbart M, Deng X, Baker SC. Coronavirus endoribonuclease targets viral polyuridine  
1059 sequences to evade activating host sensors. *Proc Natl Acad Sci U S A*. 2020;117(14):8094-  
1060 103. Epub 2020/03/22. doi: 10.1073/pnas.1921485117. PubMed PMID: 32198201; PubMed  
1061 Central PMCID: PMCPMC7149396.
- 1062 66. Lei Y, Moore CB, Liesman RM, O'Connor BP, Bergstralh DT, Chen ZJ, et al. MAVS-  
1063 mediated apoptosis and its inhibition by viral proteins. *PLoS One*. 2009;4(5):e5466. Epub  
1064 2009/05/01. doi: 10.1371/journal.pone.0005466. PubMed PMID: 19404494; PubMed Central  
1065 PMCID: PMCPMC2674933.
- 1066 67. Pindel A, Sadler A. The role of protein kinase R in the interferon response. *Journal of*  
1067 *interferon & cytokine research : the official journal of the International Society for Interferon and*

- 1068 Cytokine Research. 2011;31(1):59-70. doi: 10.1089/jir.2010.0099. PubMed PMID: 21166592.
- 1069 68. Python S, Gerber M, Suter R, Ruggli N, Summerfield A. Efficient sensing of infected cells  
1070 in absence of virus particles by plasmacytoid dendritic cells is blocked by the viral ribonuclease  
1071 Erns. PLoS pathogens. 2013;9(6).
- 1072 69. Hastie KM, Kimberlin CR, Zandonatti MA, MacRae IJ, Saphire EO. Structure of the Lassa  
1073 virus nucleoprotein reveals a dsRNA-specific 3' to 5' exonuclease activity essential for  
1074 immune suppression. Proceedings of the National Academy of Sciences. 2011;108(6):2396-  
1075 401.
- 1076 70. Qi X, Lan S, Wang W, Schelde LM, Dong H, Wallat GD, et al. Cap binding and immune  
1077 evasion revealed by Lassa nucleoprotein structure. Nature. 2010;468(7325):779-83.
- 1078 71. Yoneyama M, Jogi M, Onomoto K. Regulation of antiviral innate immune signaling by  
1079 stress-induced RNA granules. J Biochem. 2016;159(3):279-86. doi: 10.1093/jb/mvv122.  
1080 PubMed PMID: 26748340; PubMed Central PMCID: PMC4763080.
- 1081 72. Oh SW, Onomoto K, Wakimoto M, Onoguchi K, Ishidate F, Fujiwara T, et al. Leader-  
1082 Containing Uncapped Viral Transcript Activates RIG-I in Antiviral Stress Granules. PLoS  
1083 Pathog. 2016;12(2):e1005444. doi: 10.1371/journal.ppat.1005444. PubMed PMID: 26862753;  
1084 PubMed Central PMCID: PMC4749238.
- 1085 73. Onomoto K, Yoneyama M, Fung G, Kato H, Fujita T. Antiviral innate immunity and stress  
1086 granule responses. Trends Immunol. 2014;35(9):420-8. doi: 10.1016/j.it.2014.07.006. PubMed  
1087 PMID: 25153707.
- 1088 74. Burgess HM, Mohr I. Defining the Role of Stress Granules in Innate Immune Suppression  
1089 by the Herpes Simplex Virus 1 Endoribonuclease VHS. Journal of virology. 2018;92(15). doi:

- 1090 10.1128/JVI.00829-18. PubMed PMID: 29793959; PubMed Central PMCID: PMC6052315.
- 1091 75. Finnen RL, Zhu M, Li J, Romo D, Banfield BW. Herpes Simplex Virus 2 Virion Host Shutoff
- 1092 Endoribonuclease Activity Is Required To Disrupt Stress Granule Formation. *Journal of virology*.
- 1093 2016;90(17):7943-55. doi: 10.1128/JVI.00947-16. PubMed PMID: 27334584; PubMed Central
- 1094 PMCID: PMC4988144.
- 1095 76. Dauber B, Poon D, Dos Santos T, Duguay BA, Mehta N, Saffran HA, et al. The Herpes
- 1096 Simplex Virus Virion Host Shutoff Protein Enhances Translation of Viral True Late mRNAs
- 1097 Independently of Suppressing Protein Kinase R and Stress Granule Formation. *Journal of*
- 1098 *virology*. 2016;90(13):6049-57. Epub 2016/04/22. doi: 10.1128/JVI.03180-15. PubMed PMID:
- 1099 27099317; PubMed Central PMCID: PMC4907241.
- 1100 77. Sciortino MT, Parisi T, Siracusano G, Mastino A, Taddeo B, Roizman B. The virion host
- 1101 shutoff RNase plays a key role in blocking the activation of protein kinase R in cells infected
- 1102 with herpes simplex virus 1. *Journal of virology*. 2013;87(6):3271-6. Epub 2013/01/11. doi:
- 1103 10.1128/JVI.03049-12. PubMed PMID: 23302873; PubMed Central PMCID:
- 1104 PMCPMC3592158.
- 1105 78. Elliott G, Pheasant K, Ebert-Keel K, Stylianou J, Franklyn A, Jones J. Multiple
- 1106 Posttranscriptional Strategies To Regulate the Herpes Simplex Virus 1 vhs Endoribonuclease.
- 1107 *Journal of virology*. 2018;92(17). Epub 2018/06/22. doi: 10.1128/JVI.00818-18. PubMed PMID:
- 1108 29925667; PubMed Central PMCID: PMC6096803.
- 1109 79. Huang C, Lokugamage KG, Rozovics JM, Narayanan K, Semler BL, Makino S. SARS
- 1110 coronavirus nsp1 protein induces template-dependent endonucleolytic cleavage of mRNAs:
- 1111 viral mRNAs are resistant to nsp1-induced RNA cleavage. *PLoS Pathog*. 2011;7(12):e1002433.

- 1112 Epub 2011/12/17. doi: 10.1371/journal.ppat.1002433. PubMed PMID: 22174690; PubMed  
1113 Central PMCID: PMCPMC3234236.
- 1114 80. Kamitani W, Huang C, Narayanan K, Lokugamage KG, Makino S. A two-pronged strategy  
1115 to suppress host protein synthesis by SARS coronavirus Nsp1 protein. Nat Struct Mol Biol.  
1116 2009;16(11):1134-40. Epub 2009/10/20. doi: 10.1038/nsmb.1680. PubMed PMID: 19838190;  
1117 PubMed Central PMCID: PMCPMC2784181.
- 1118 81. Kint J, Langereis MA, Maier HJ, Britton P, van Kuppeveld FJ, Koumans J, et al. Infectious  
1119 Bronchitis Coronavirus Limits Interferon Production by Inducing a Host Shutoff That Requires  
1120 Accessory Protein 5b. J Virol. 2016;90(16):7519-28. Epub 2016/06/10. doi: 10.1128/JVI.00627-  
1121 16. PubMed PMID: 27279618; PubMed Central PMCID: PMCPMC4984617.





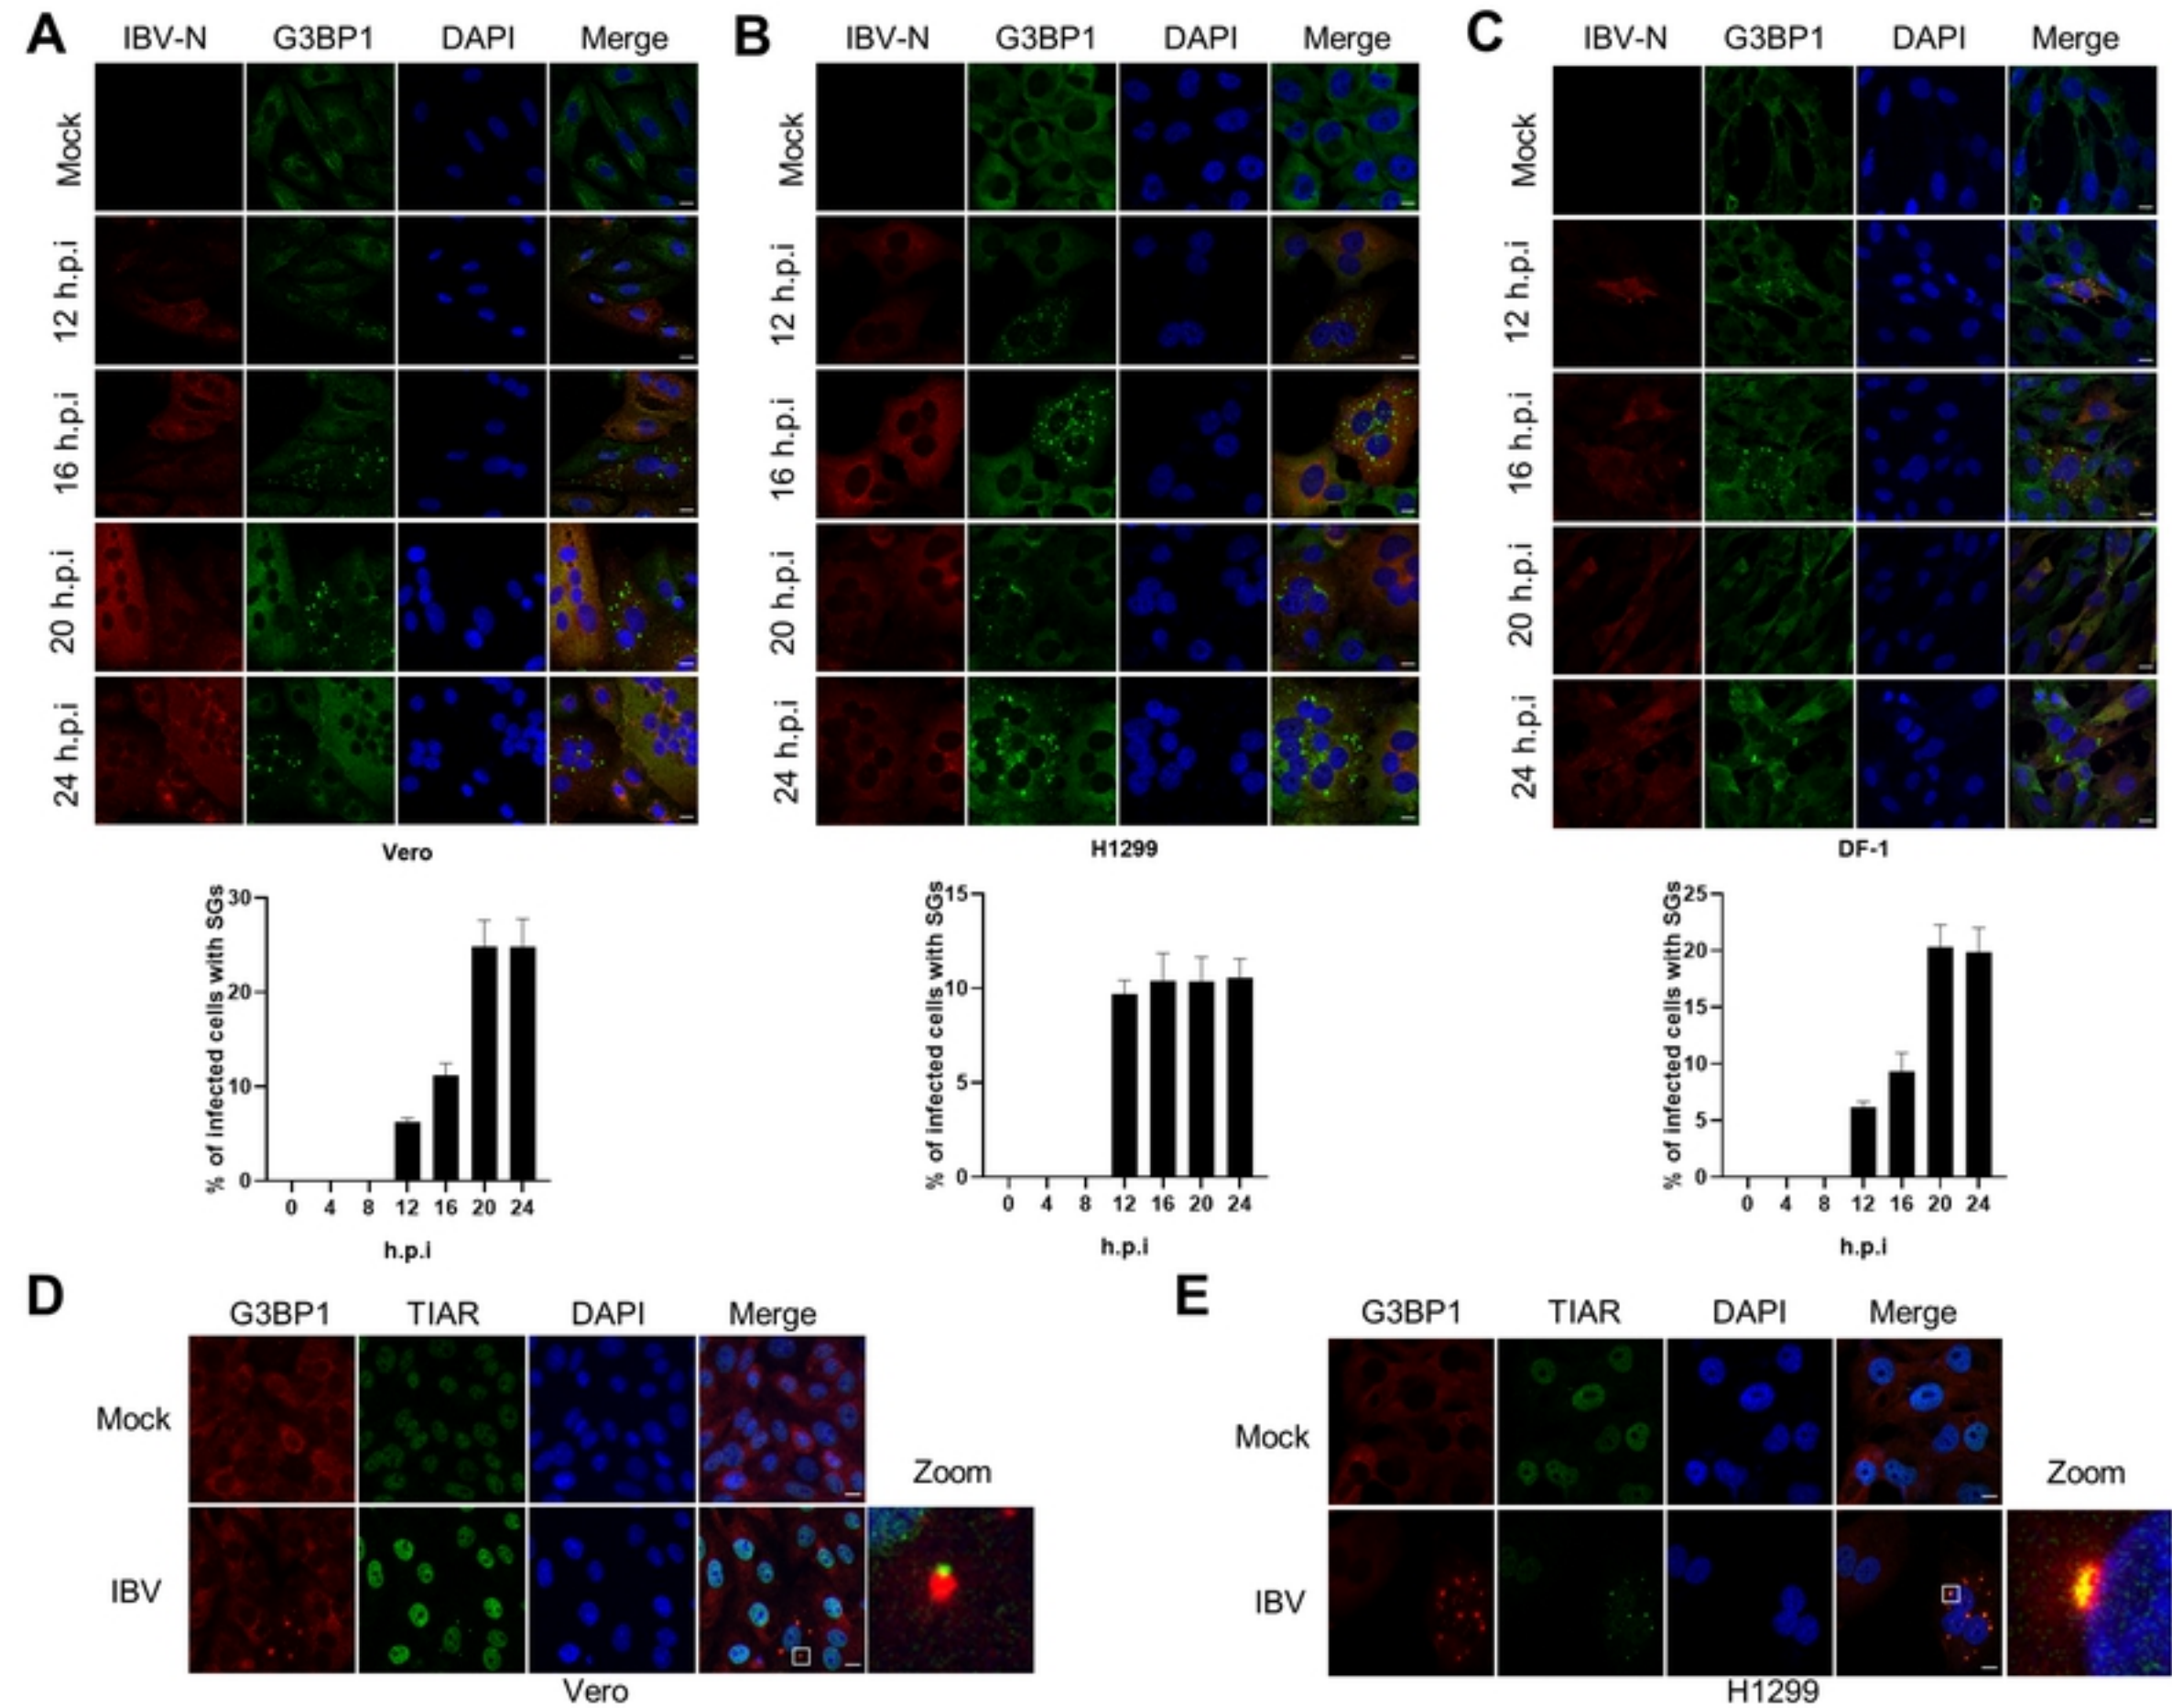

Figure 1

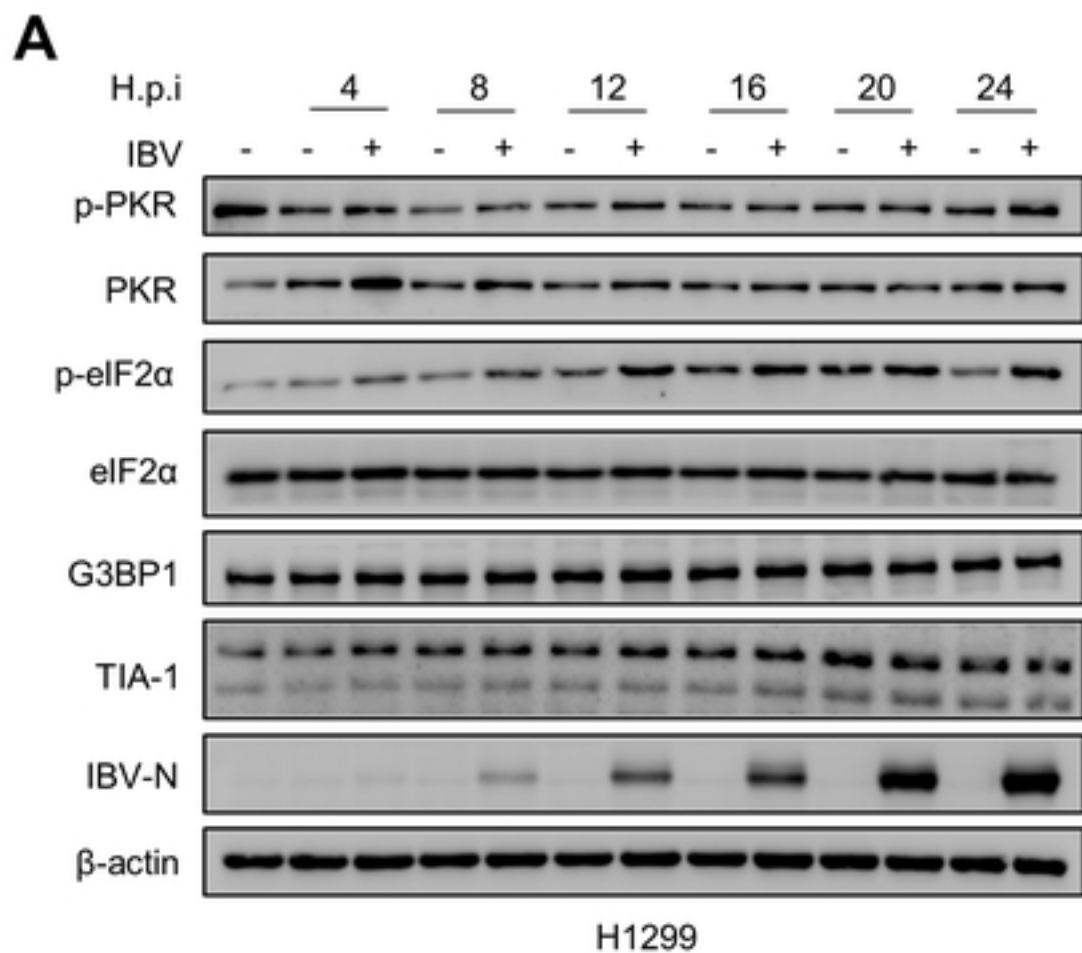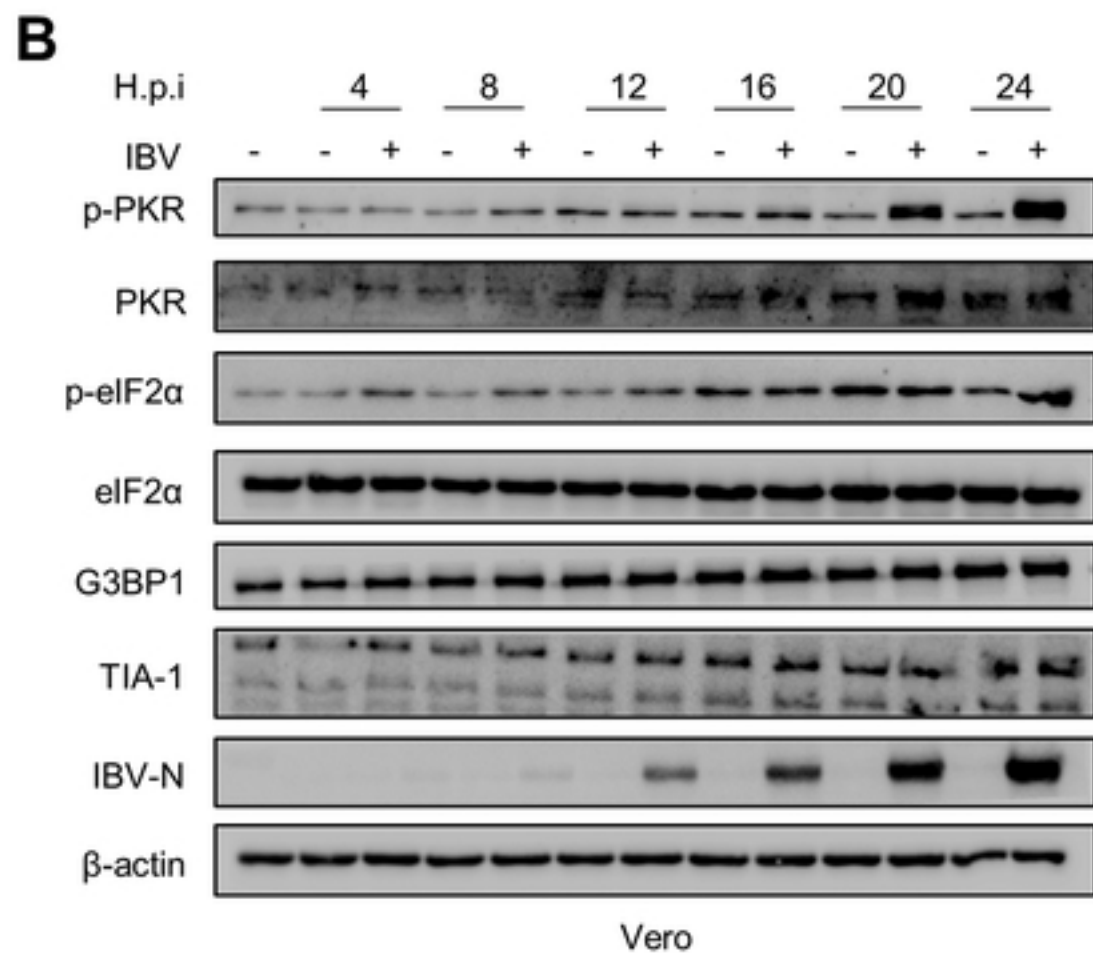

Figure 2



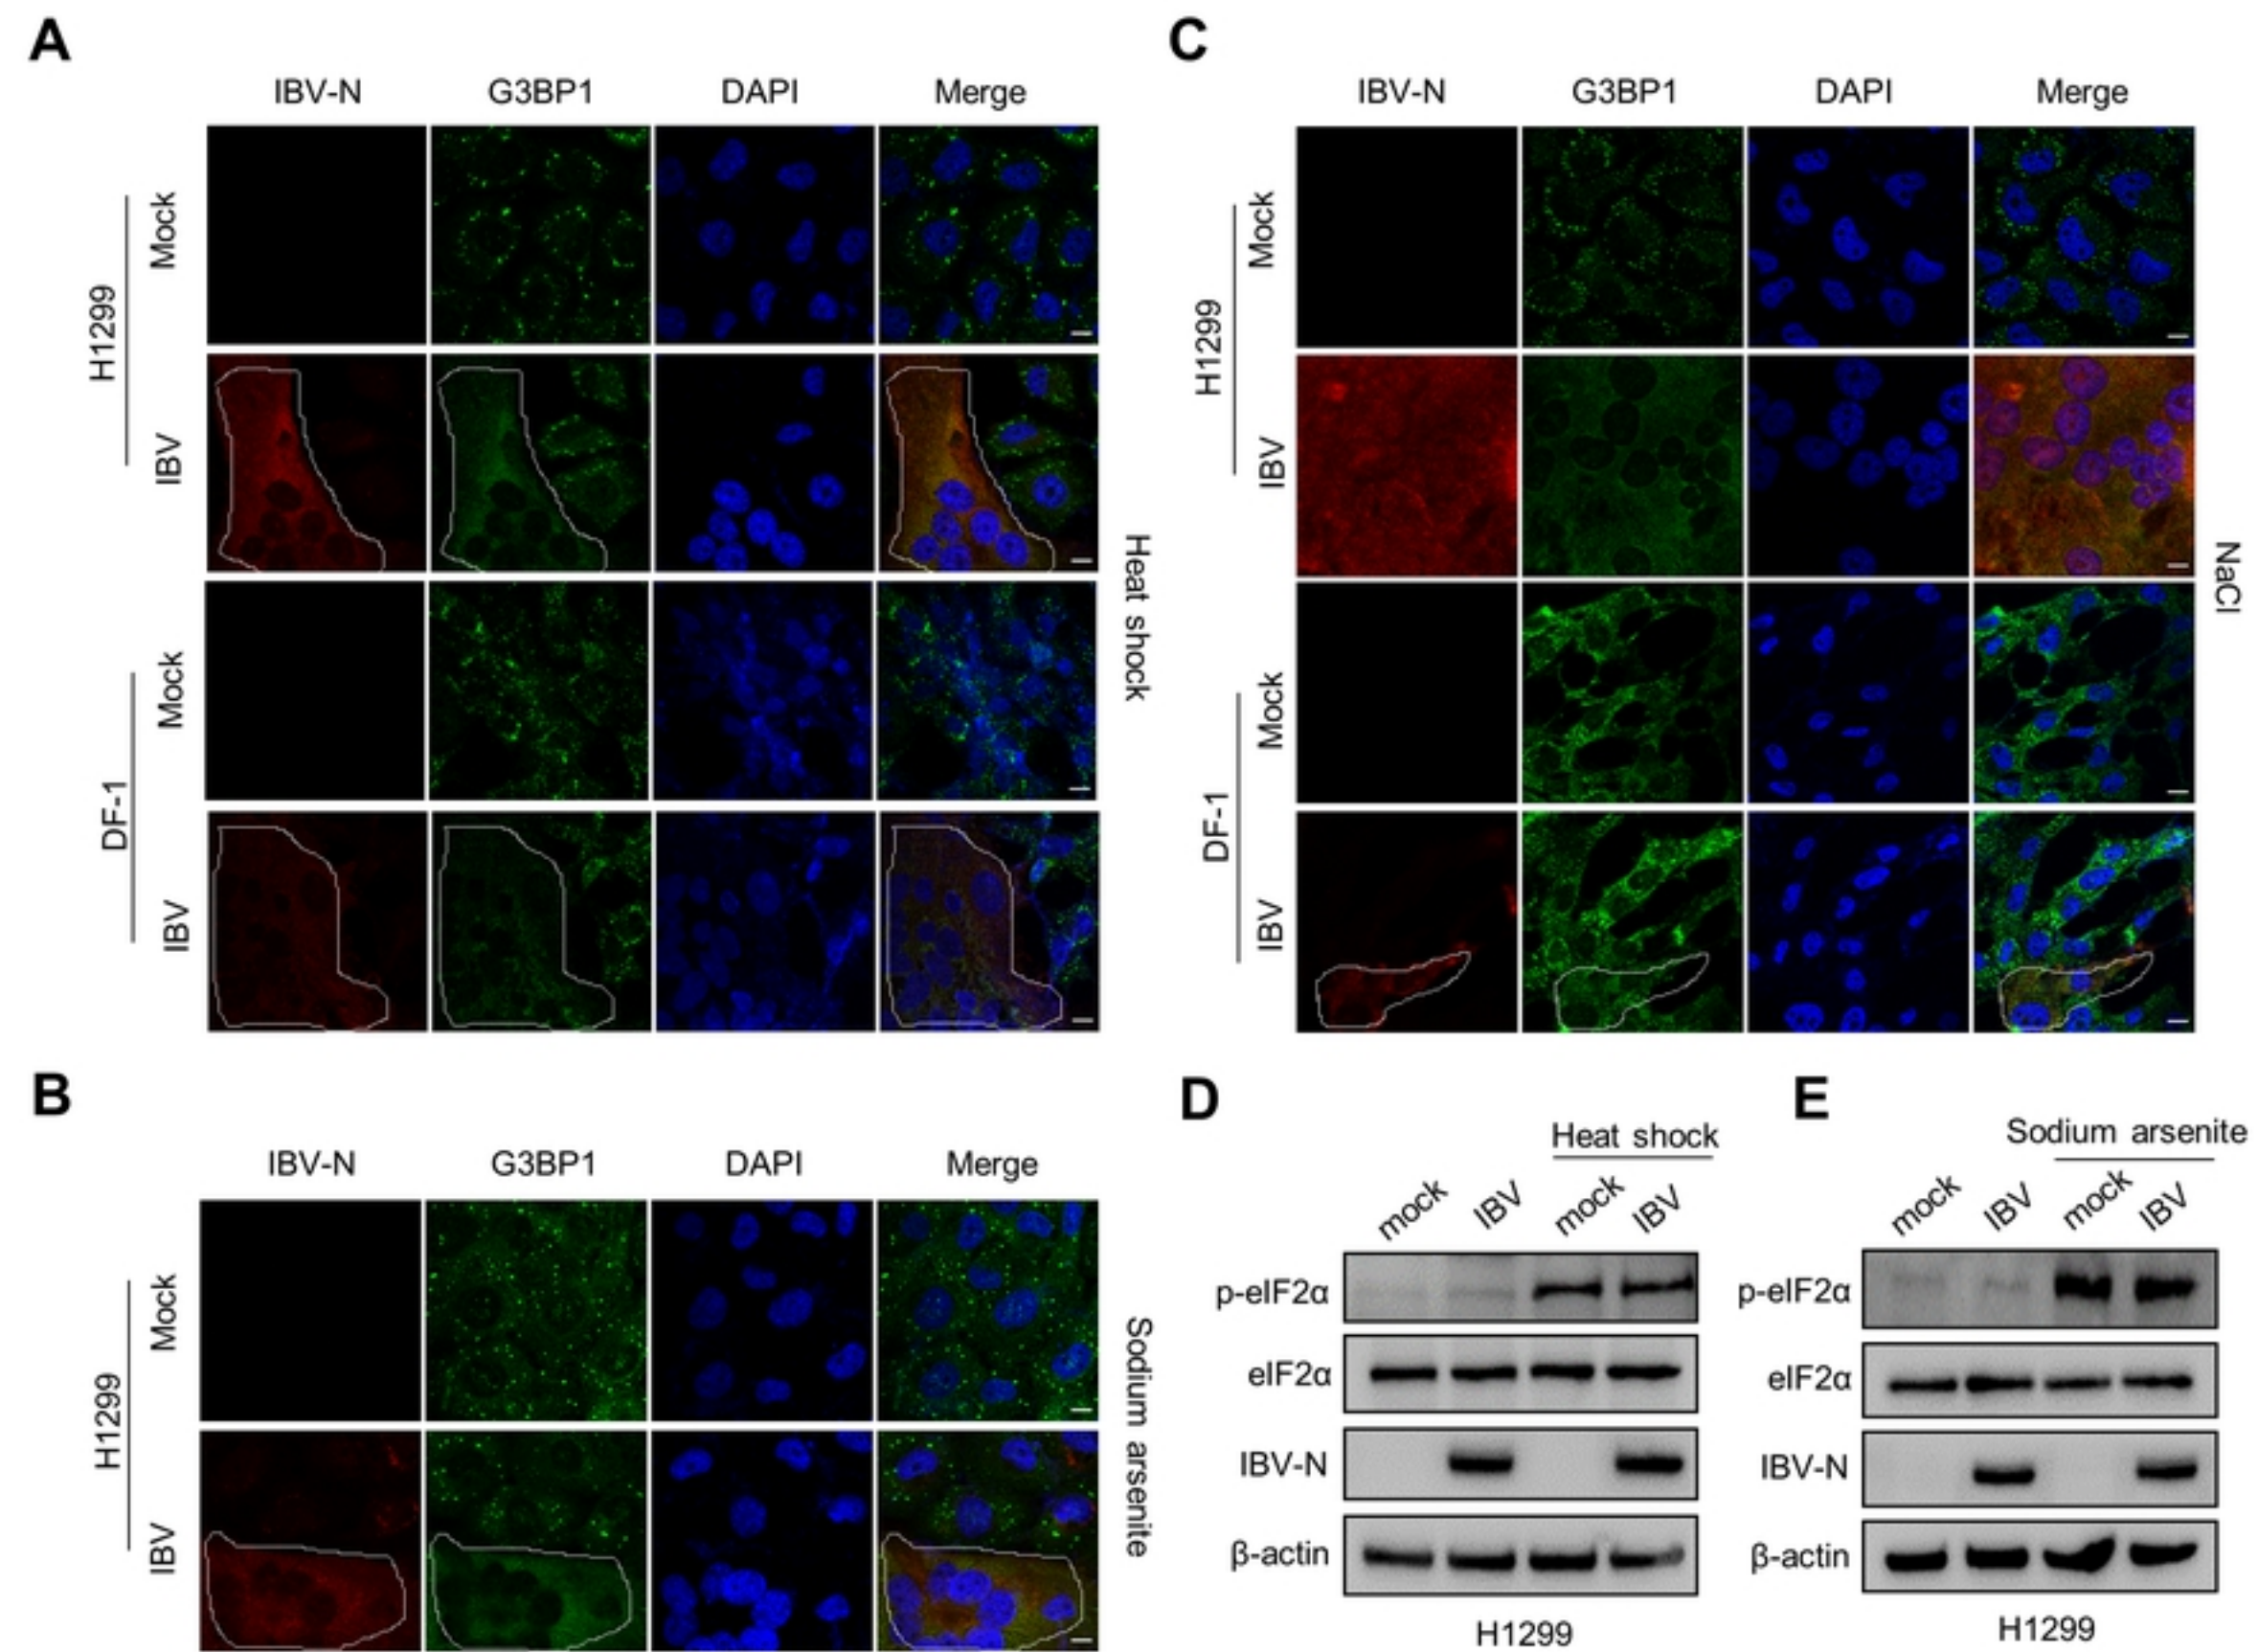

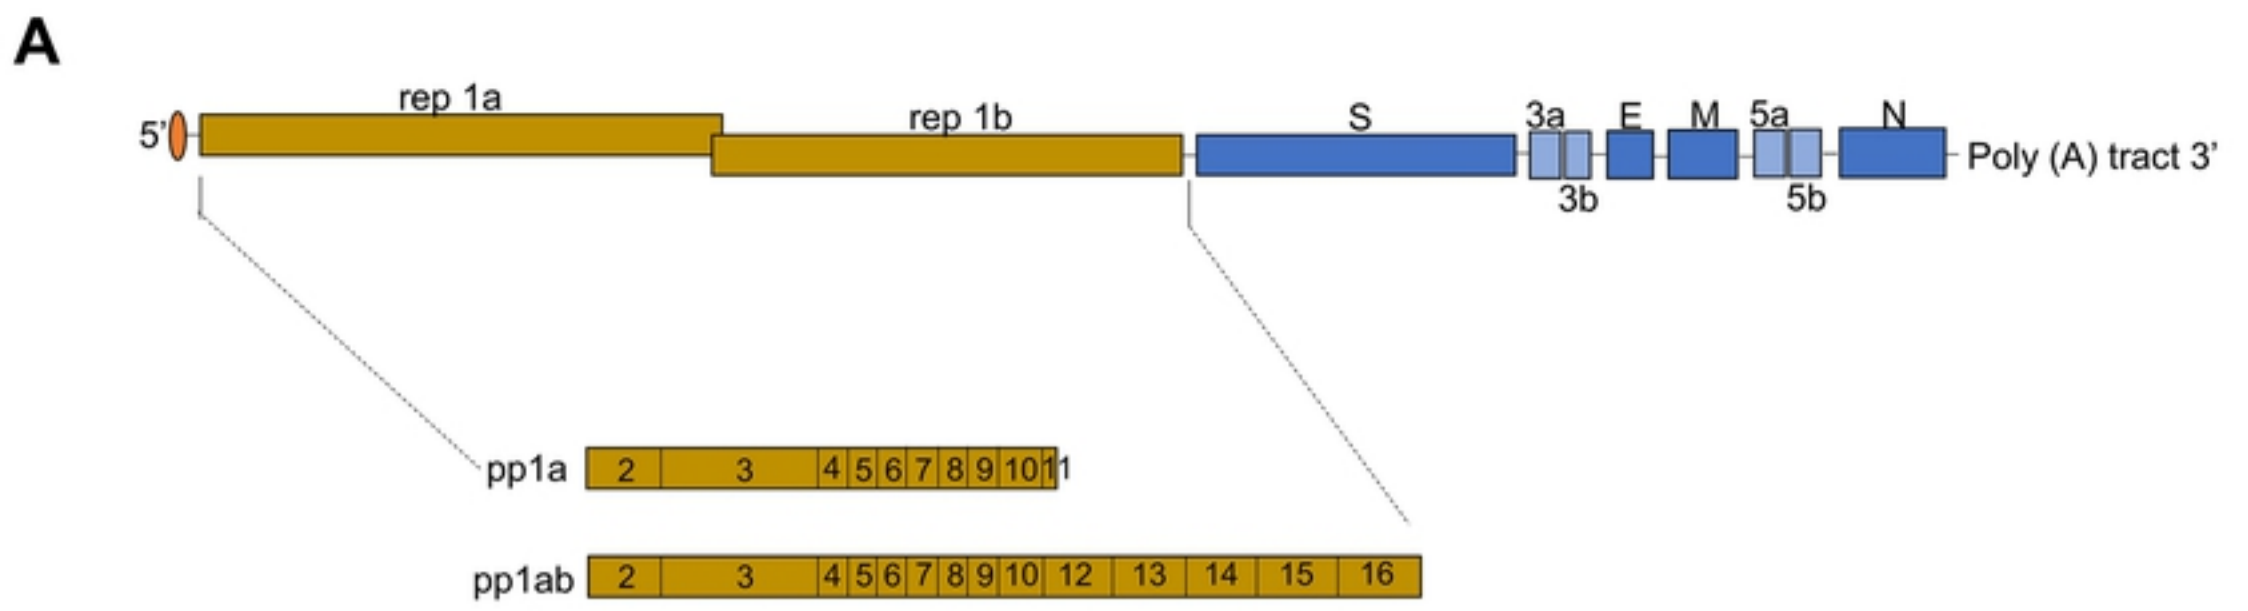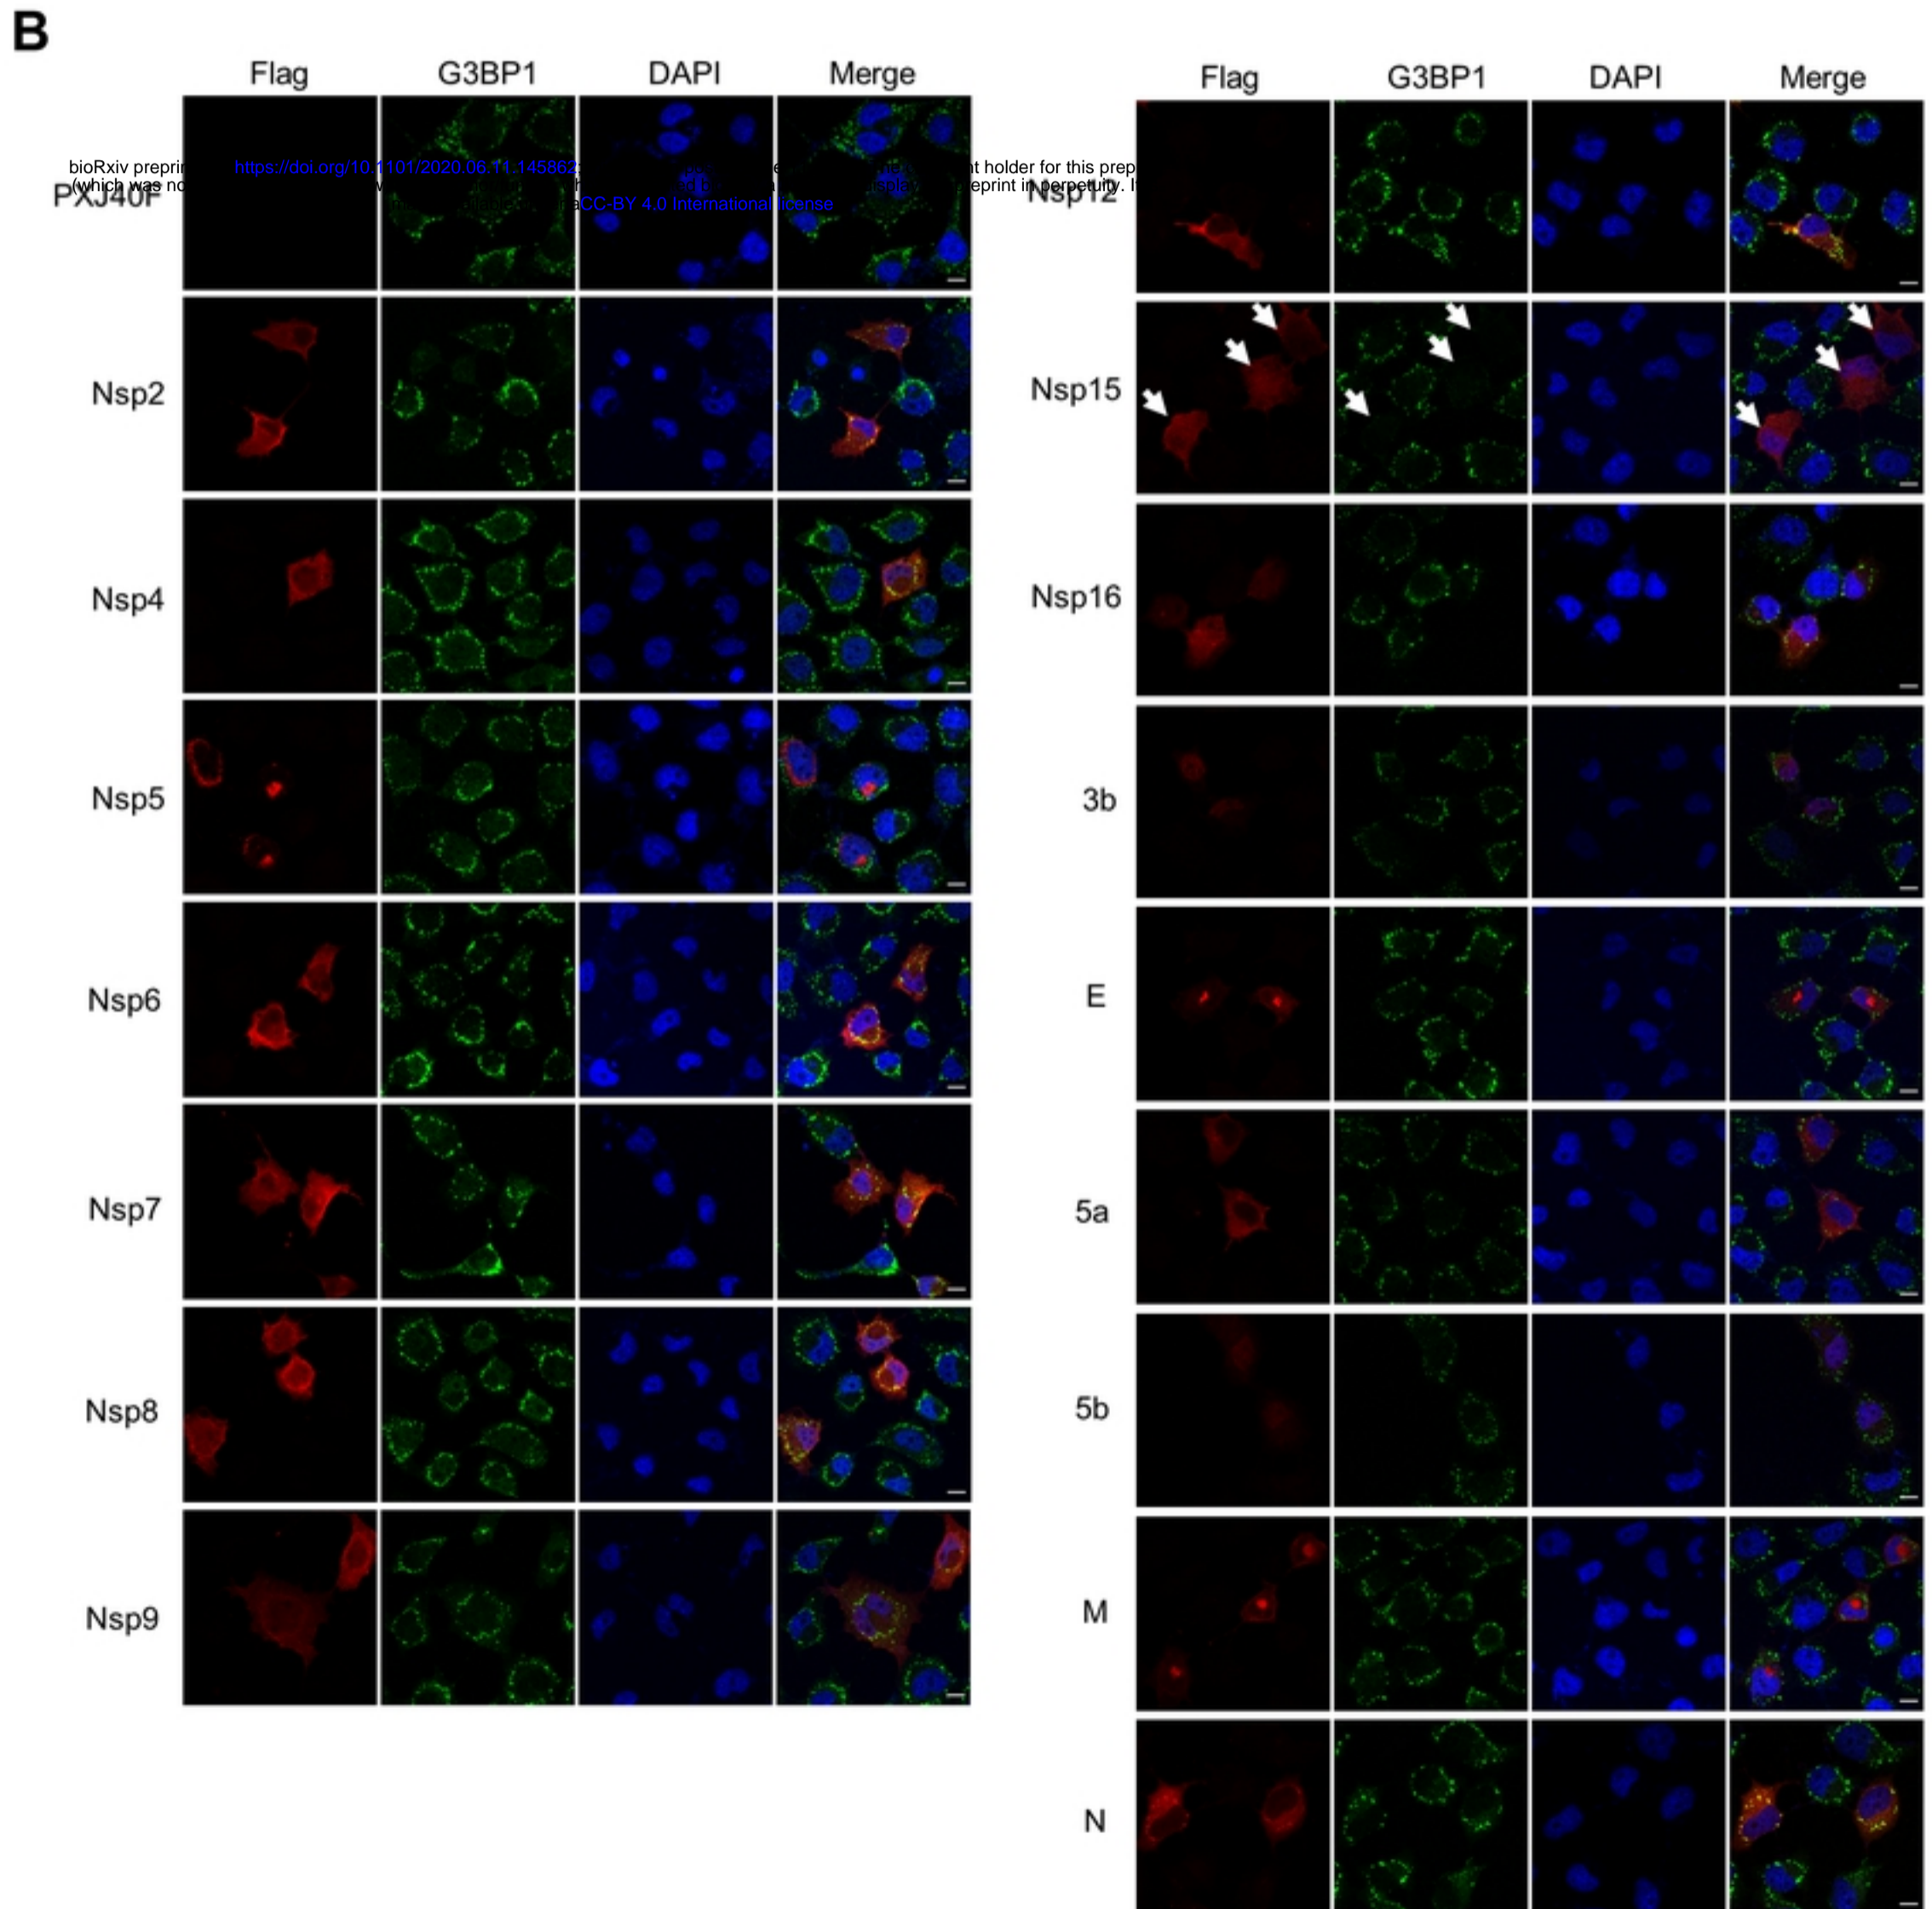

Figure 4

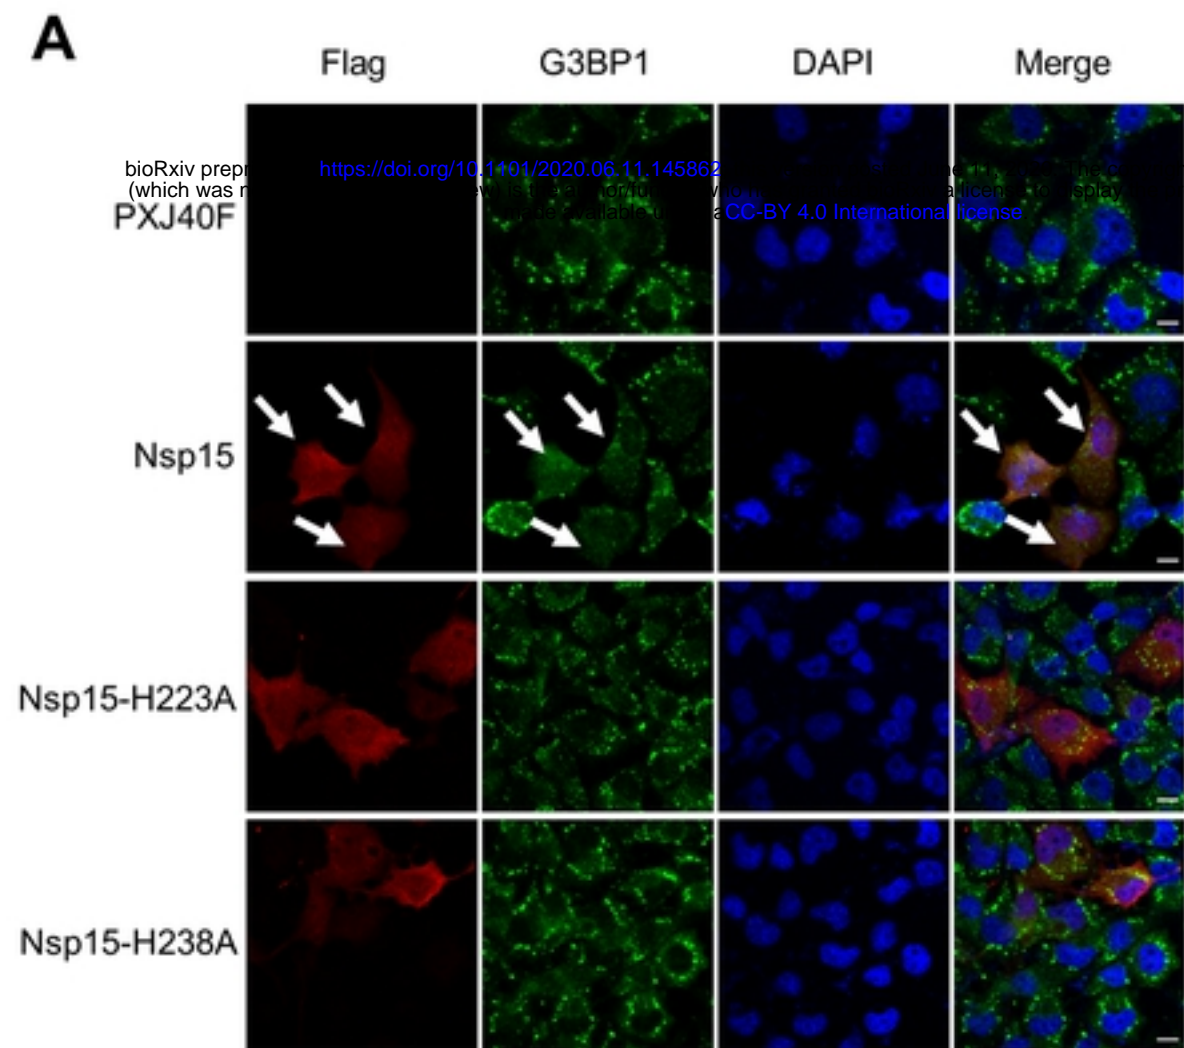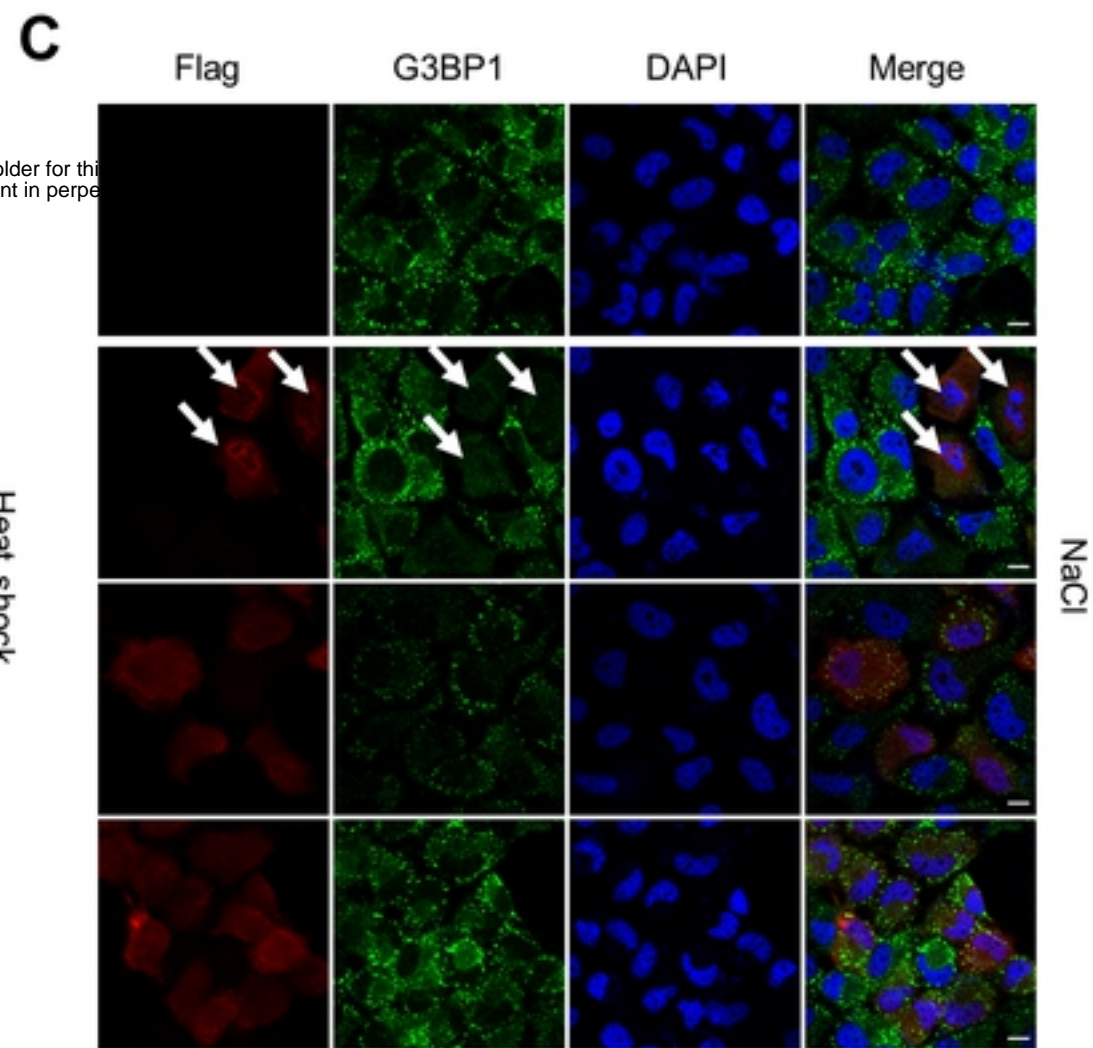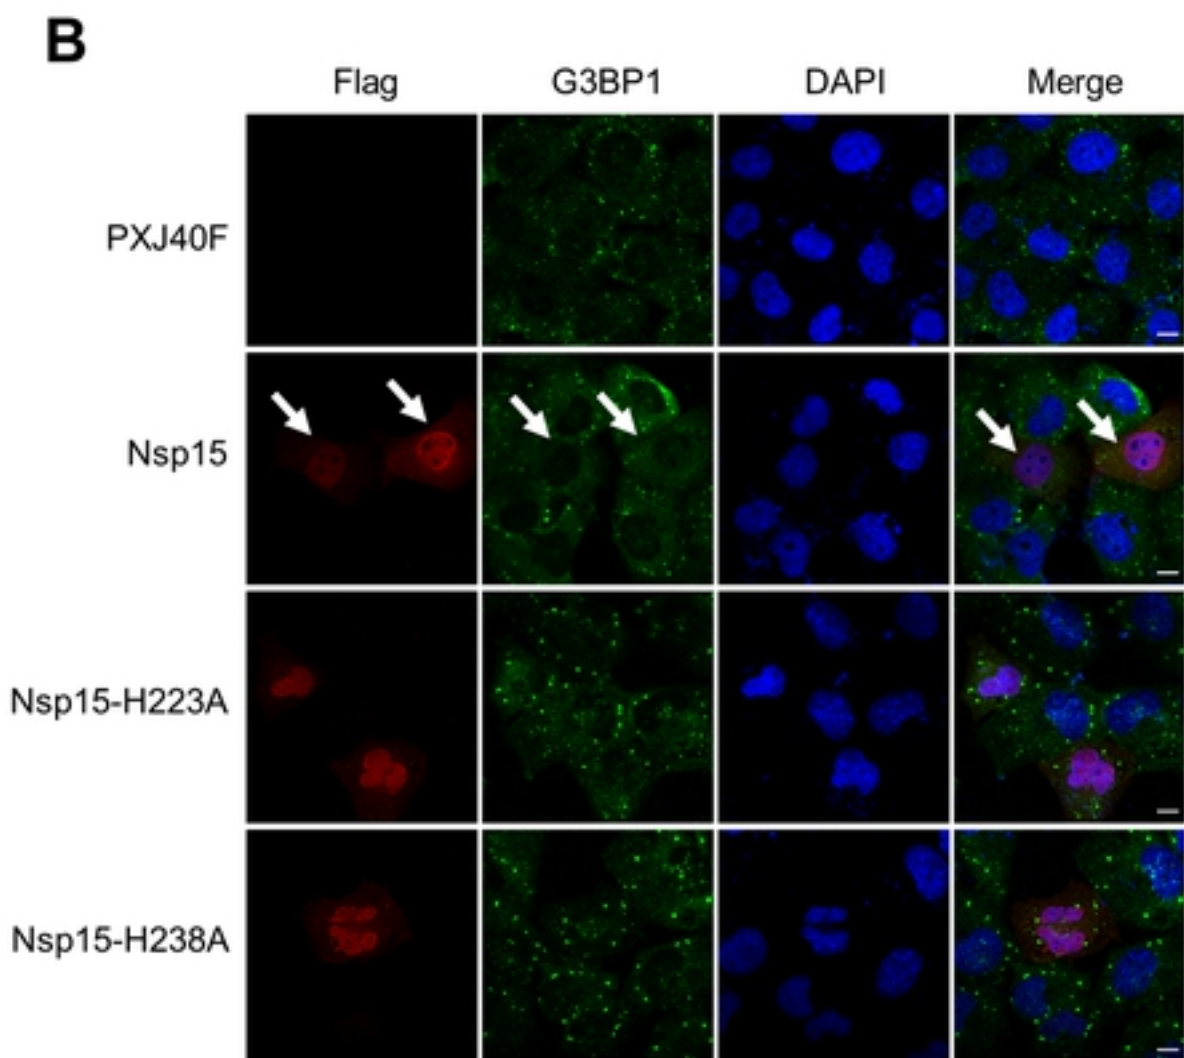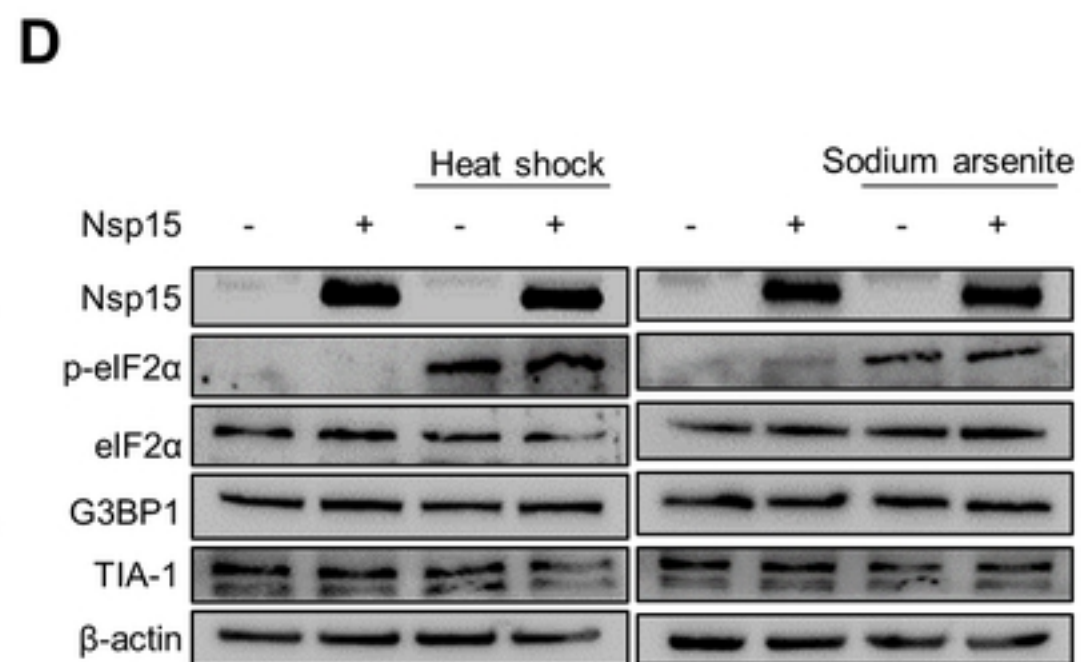

Figure 5

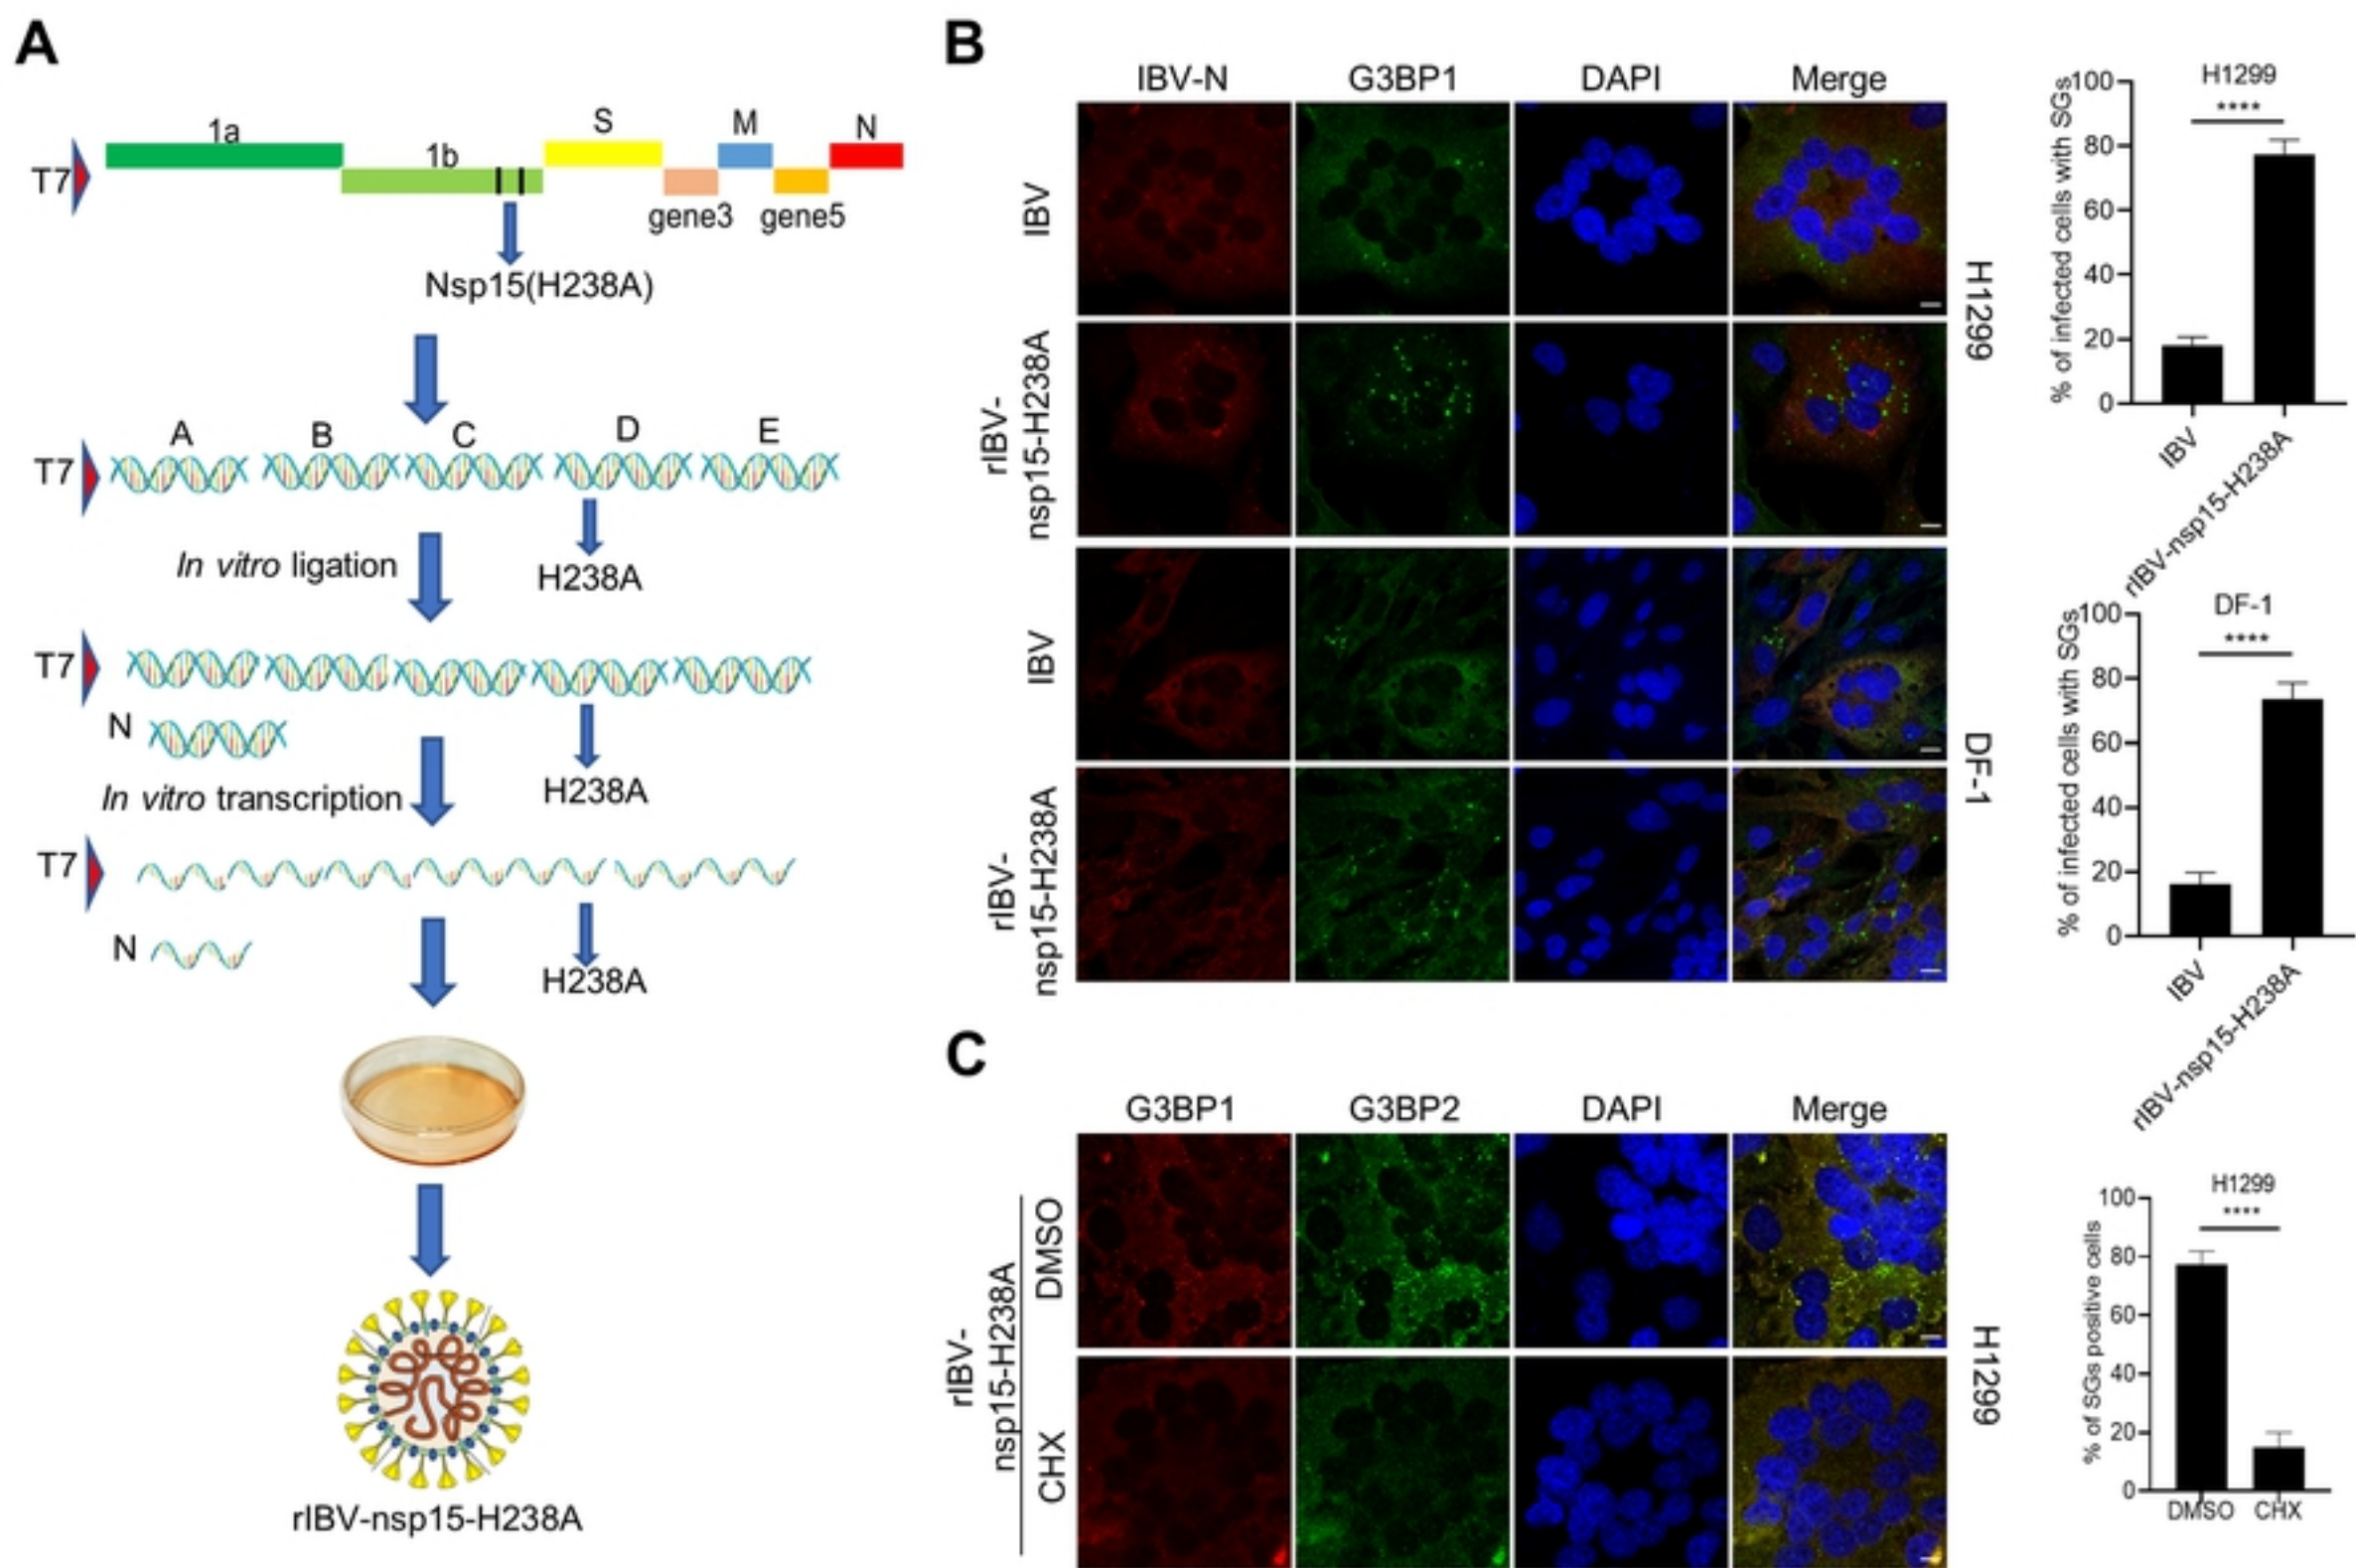

Figure 6

**A**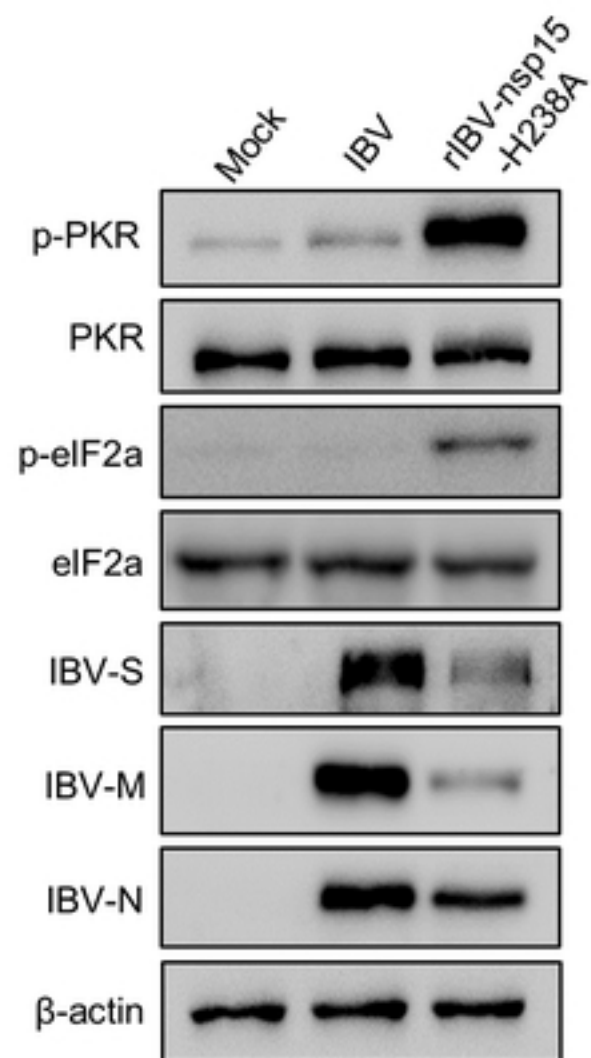**B**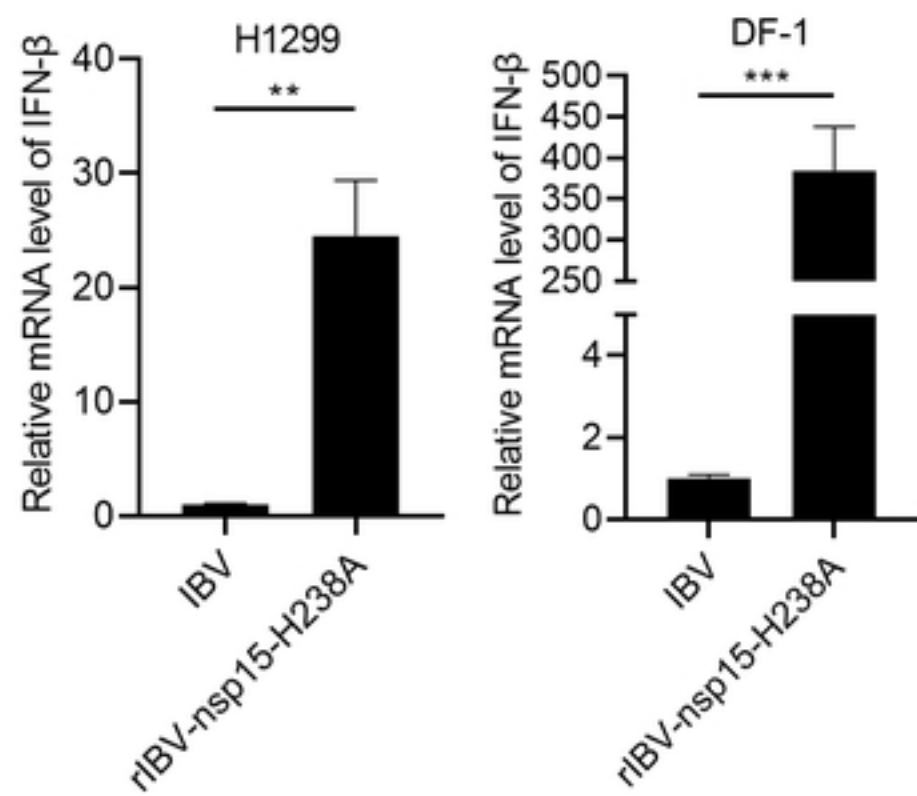**C**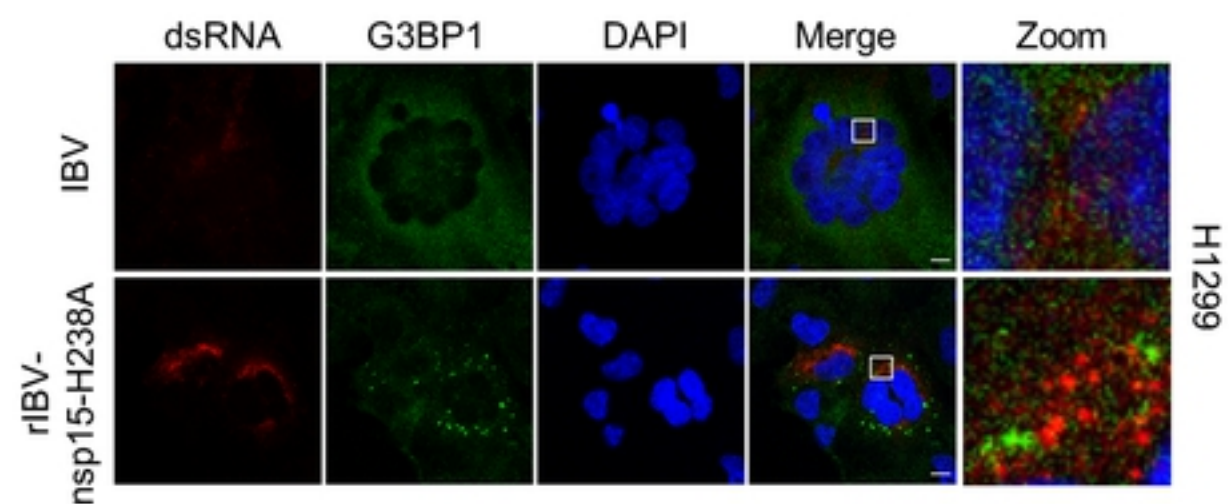**D**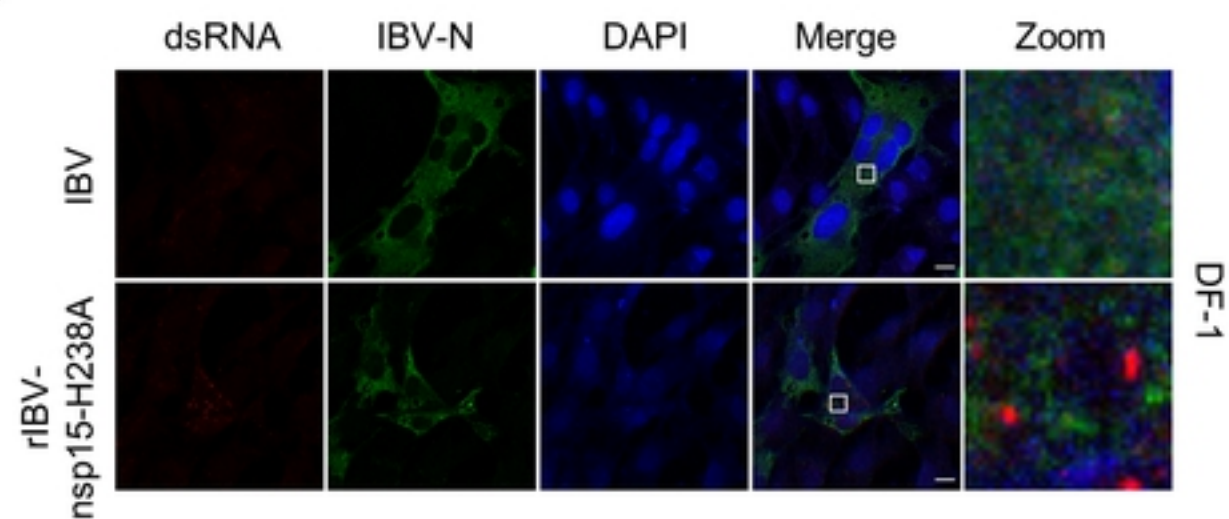

Figure 7

**A**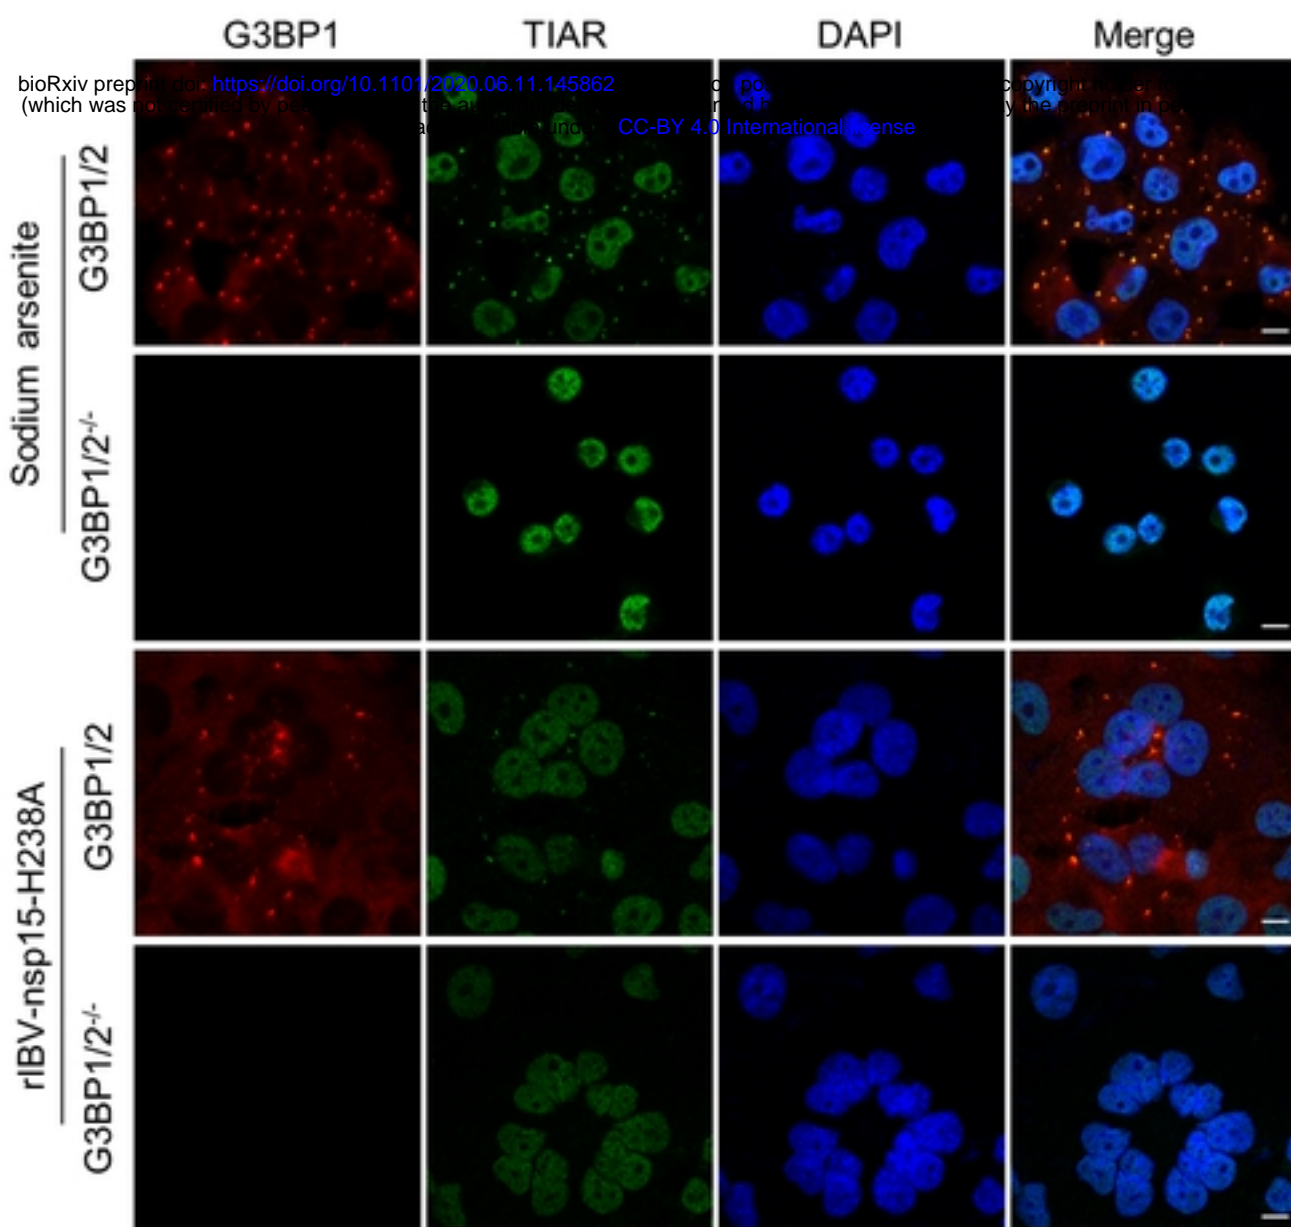**B**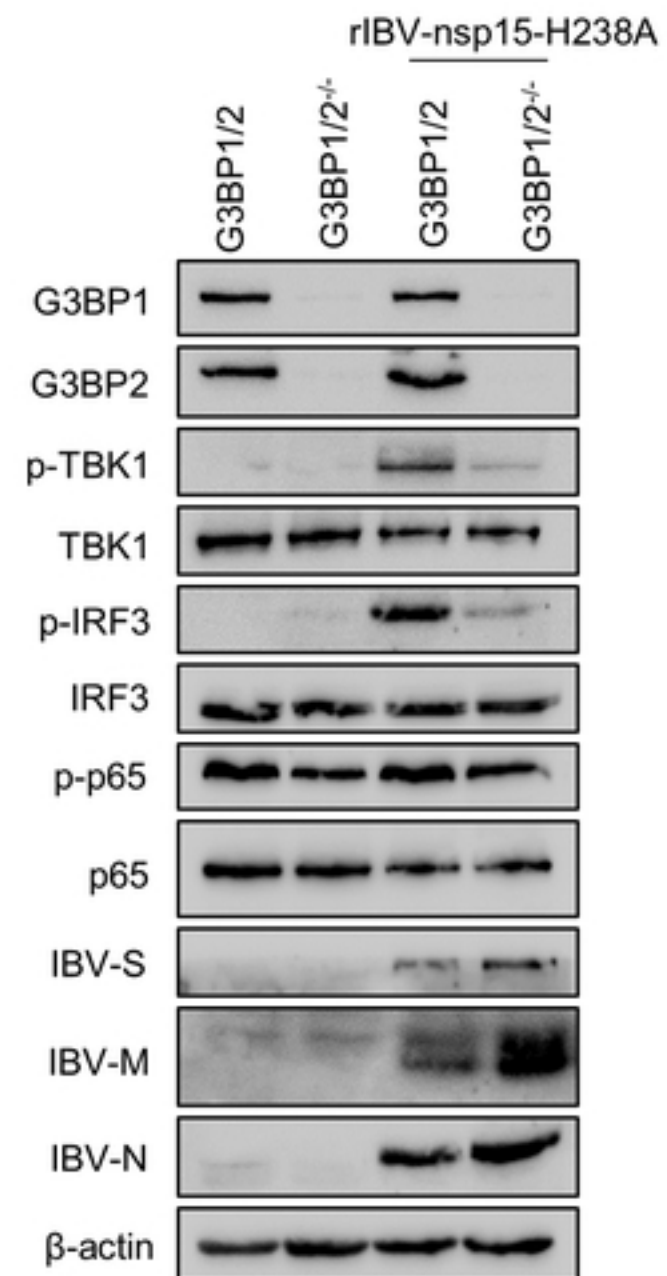**C**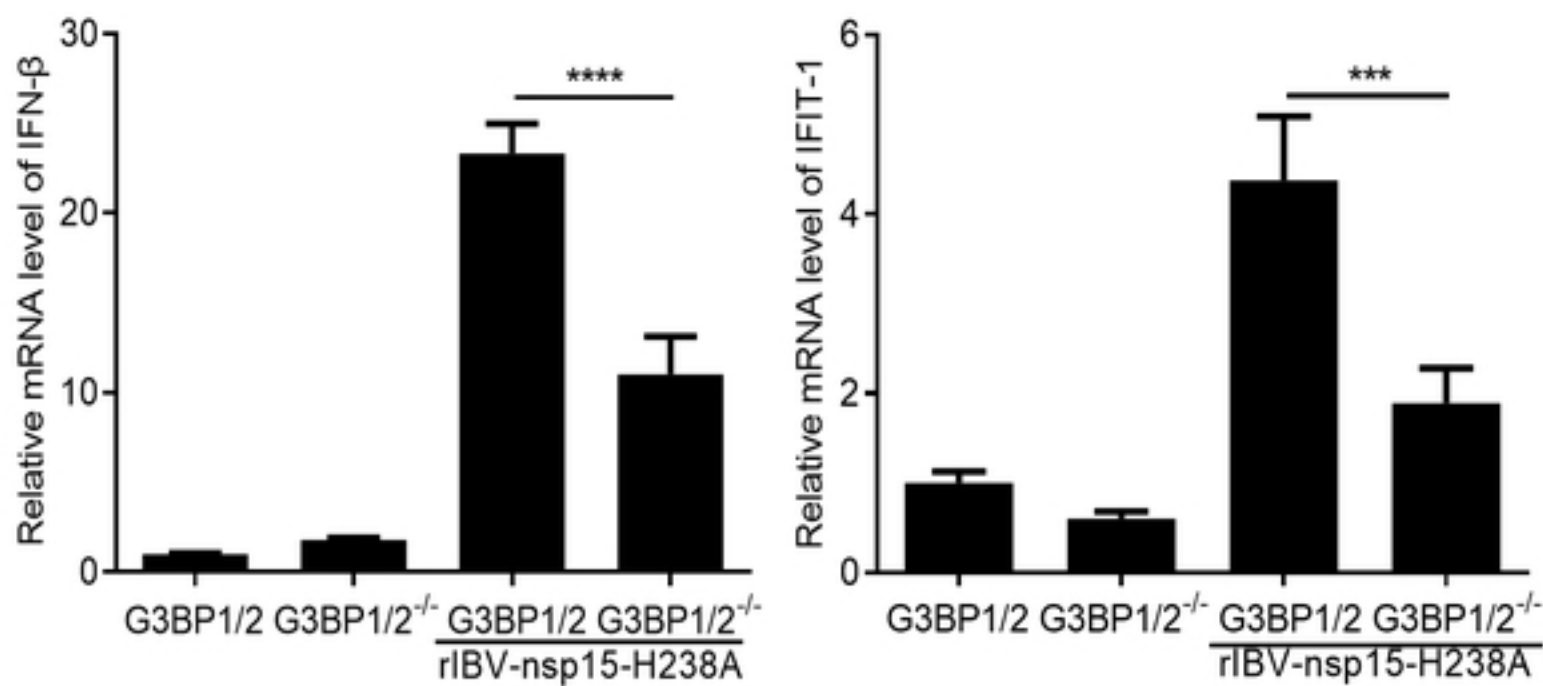**D**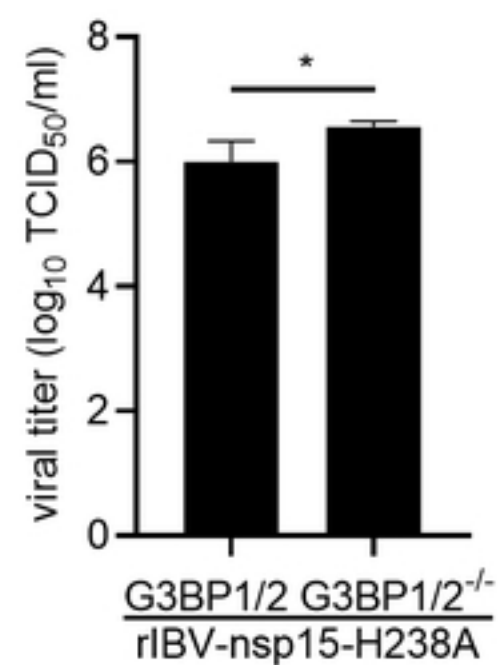

Figure 8

**A**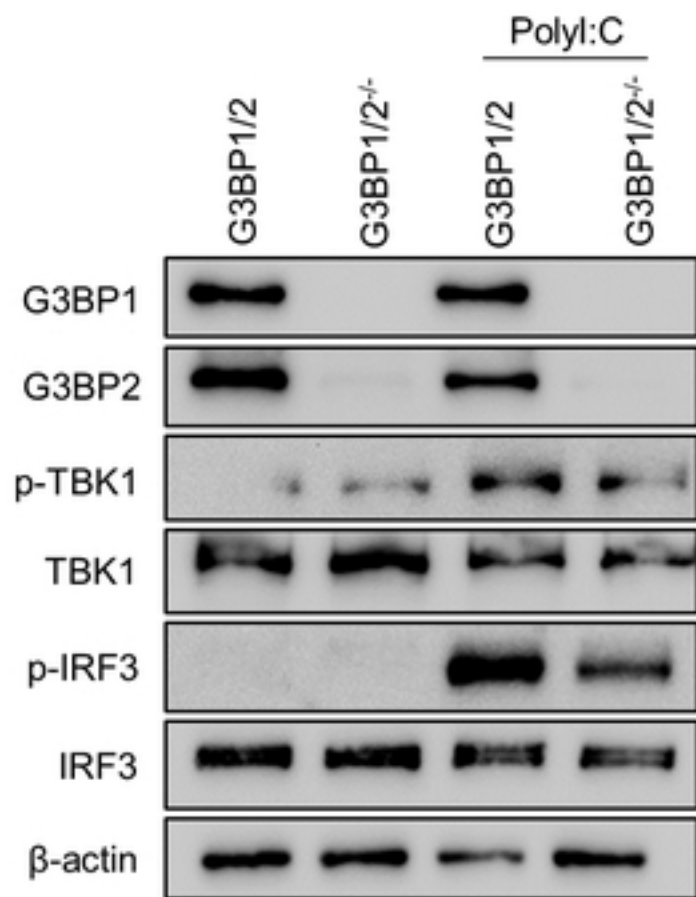**B**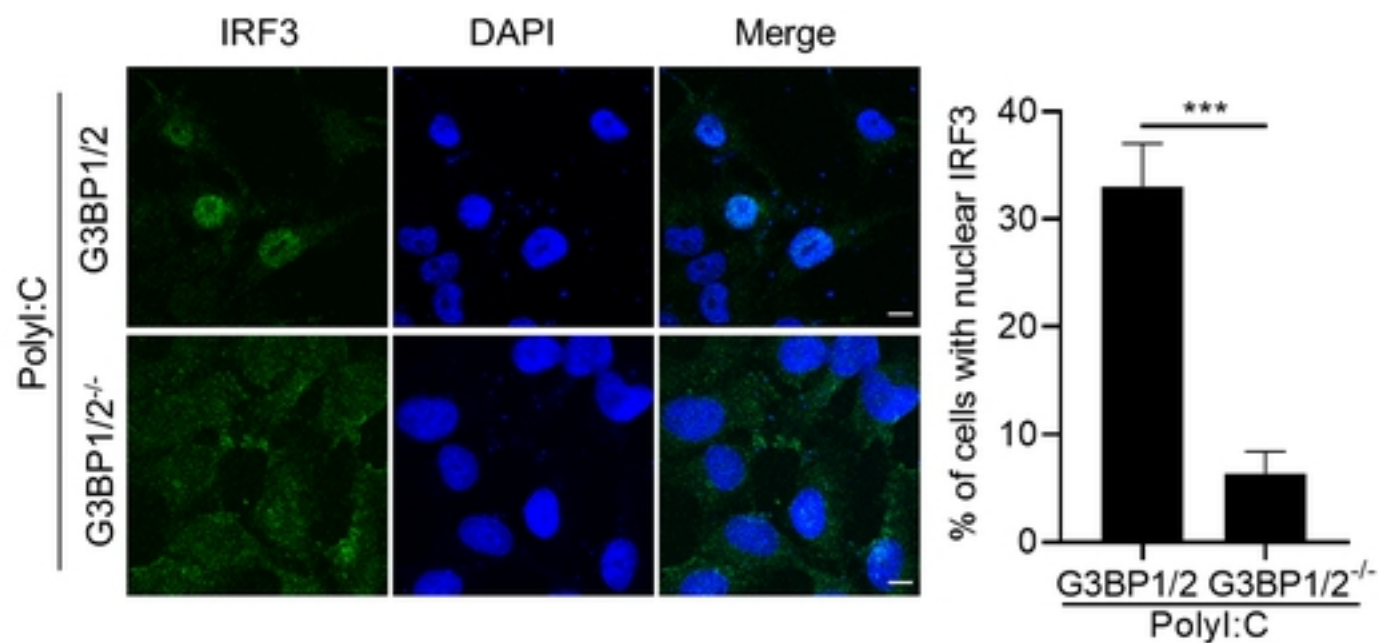**C**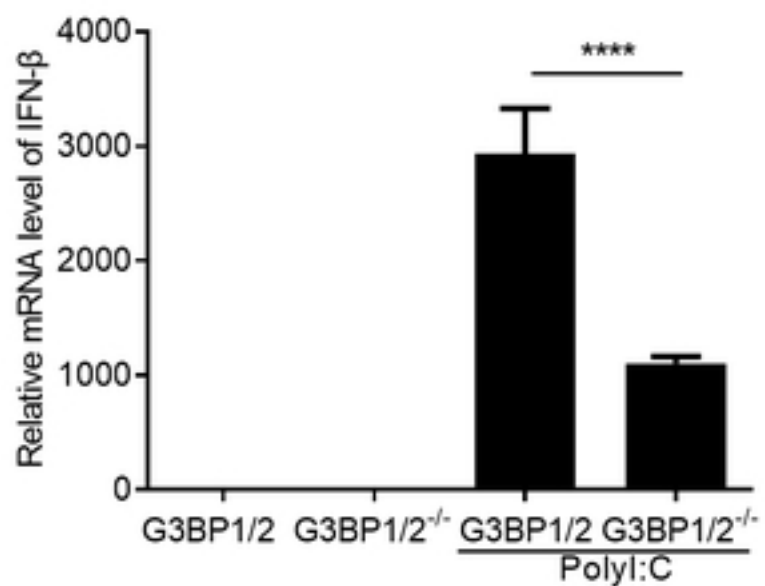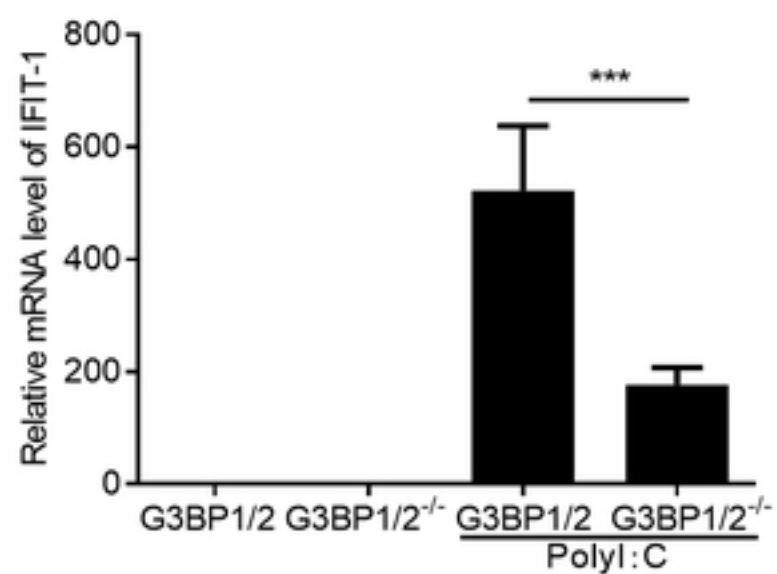

Figure 9

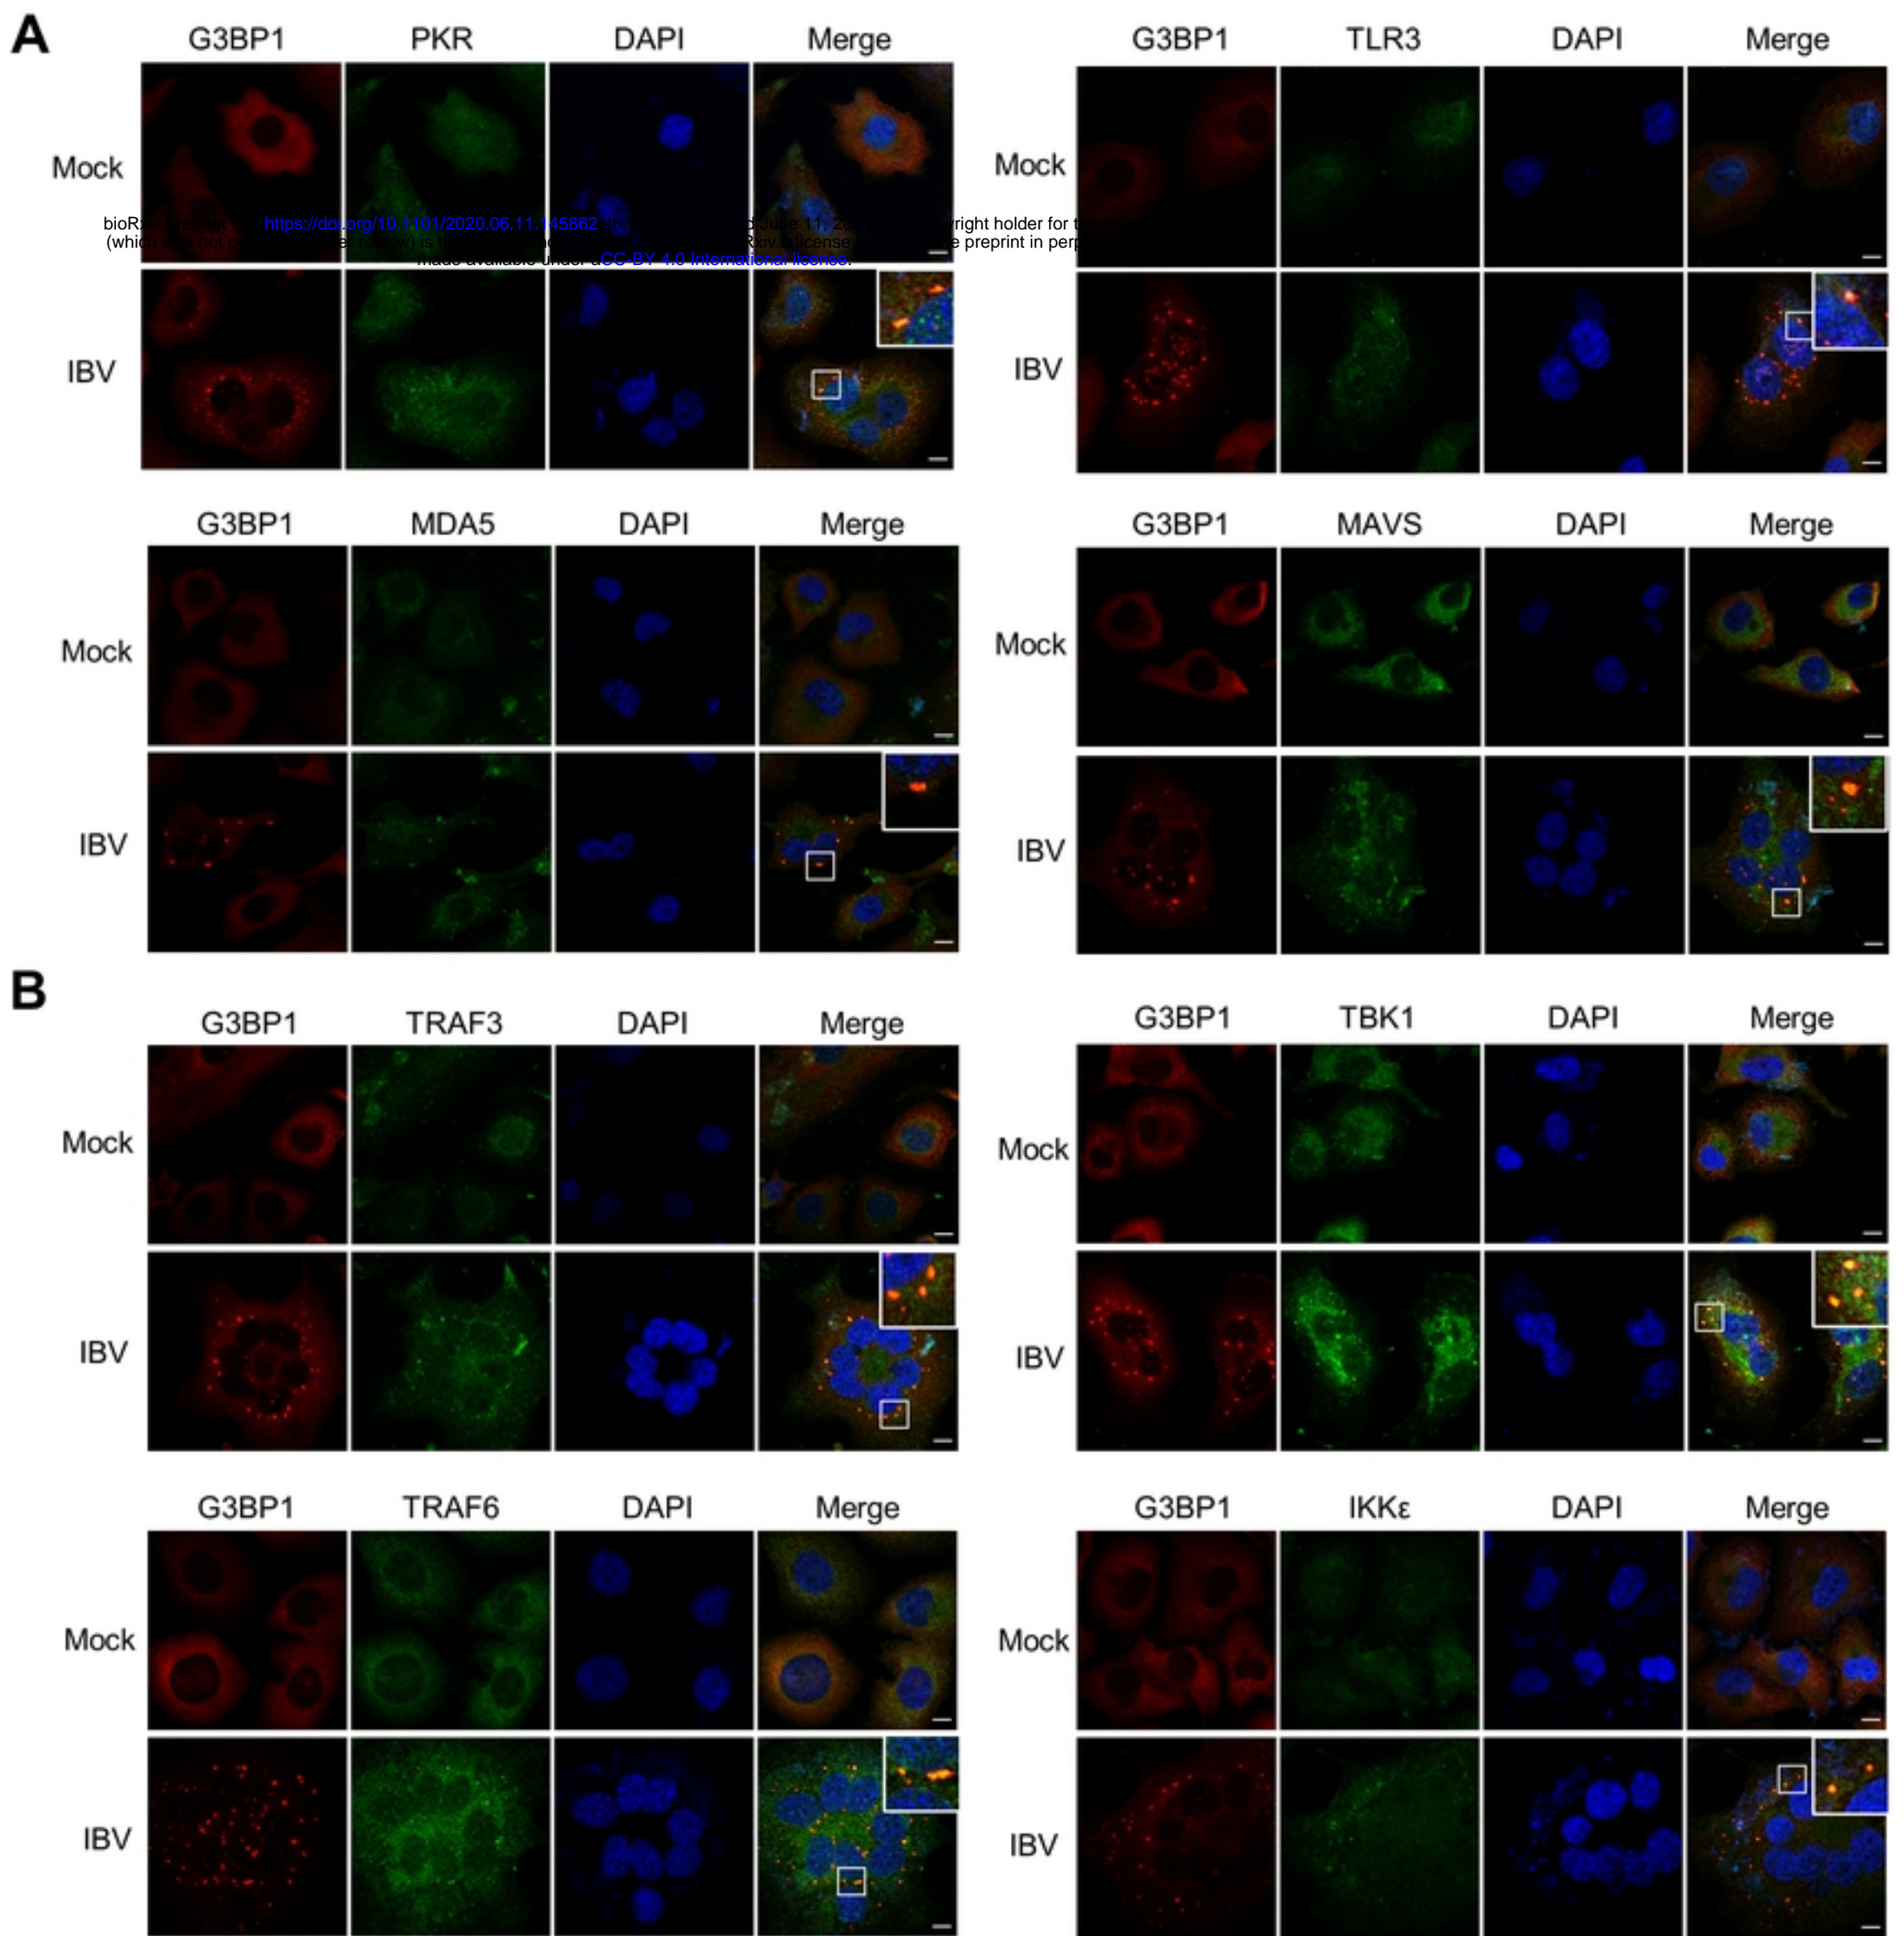

Figure 10



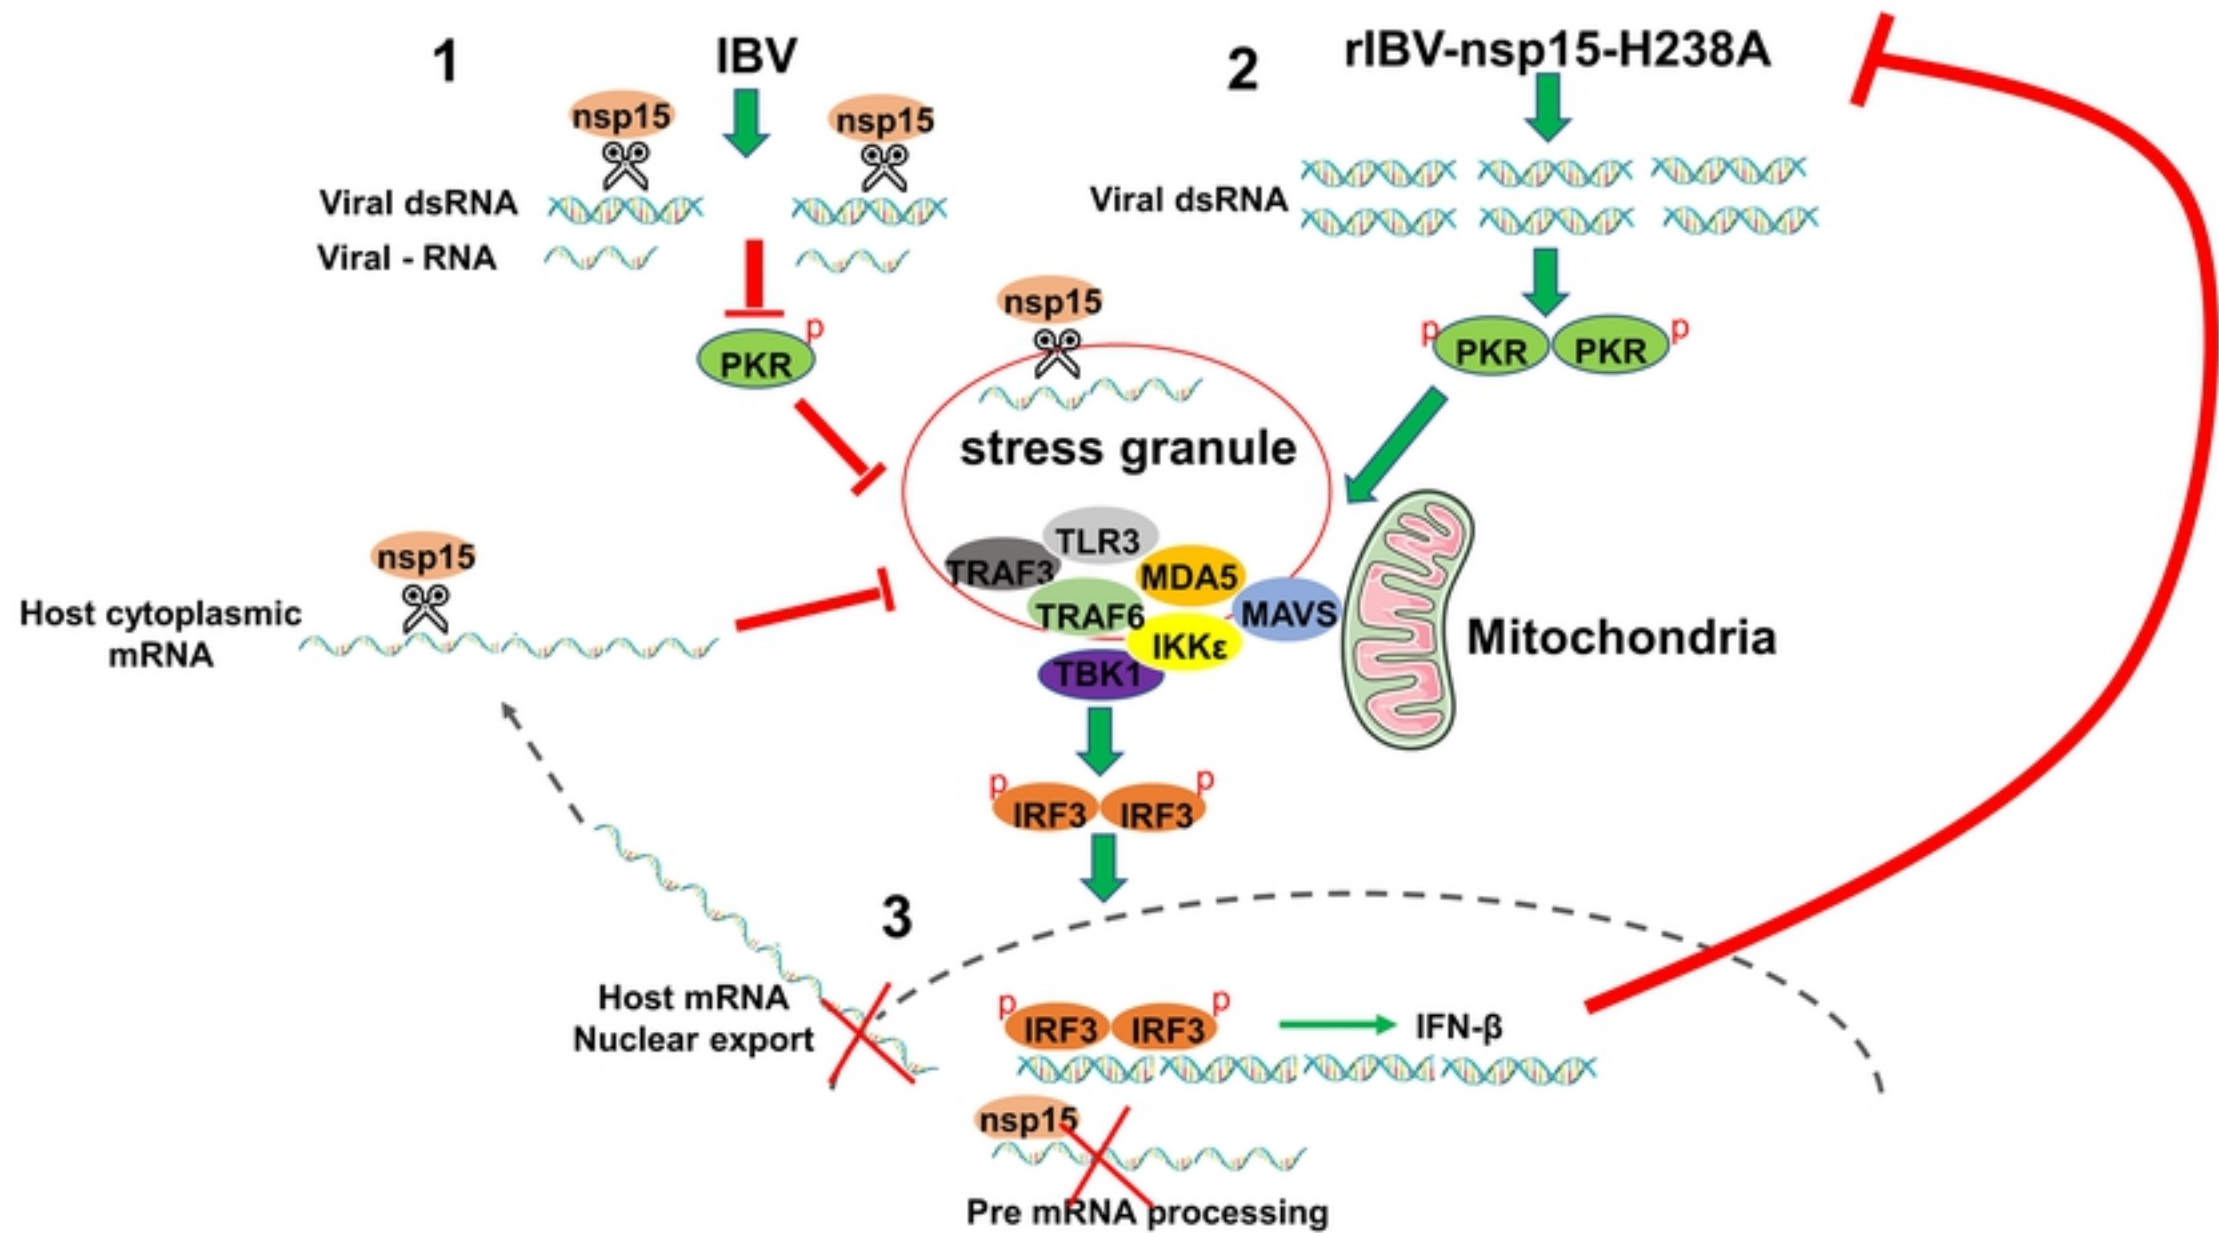

Figure 11

Table 1 The dilution of primary antibodies and cross reaction to chicken proteins

| name                   | application                                         | cross-reaction to chicken proteins |
|------------------------|-----------------------------------------------------|------------------------------------|
| IBV-S                  | Western blot (1:2000)                               | -                                  |
| IBV-M                  | Western blot (1:2000)                               | -                                  |
| IBV-N                  | Western blot (1:2000)<br>Immunofluorescence (1:200) | -                                  |
| IBV-nsp3               | Immunofluorescence (1:400)                          | -                                  |
| G3BP1                  | Western blot (1:1000)<br>Immunofluorescence (1:500) | Yes                                |
| G3BP2                  | Western blot (1:1000)<br>Immunofluorescence (1:500) | Yes                                |
| TIA-1                  | Western blot (1:1000)                               | No                                 |
| TIAR                   | Immunofluorescence (1:1600)                         | No                                 |
| PKR                    | Western blot (1:1000)<br>Immunofluorescence (1:200) | No                                 |
| phospho-PKR            | Western blot (1:1000)                               | No                                 |
| eIF2 $\alpha$          | Western blot (1:1000)                               | No                                 |
| phospho- eIF2 $\alpha$ | Western blot (1:1000)                               | No                                 |
| TBK1                   | Western blot (1:1000)<br>Immunofluorescence (1:200) | Yes                                |
| phospho-TBK1           | Western blot (1:1000)                               | Yes                                |
| IRF3                   | Western blot (1:1000)<br>Immunofluorescence (1:400) | No                                 |
| phospho-IRF3           | Western blot (1:1000)                               | No                                 |
| p65                    | Western blot (1:1000)                               | No                                 |
| phospho-p65            | Western blot (1:1000)                               | No                                 |
| MAVS                   | Immunofluorescence (1:500)                          | No                                 |
| MDA5                   | Immunofluorescence (1:200)                          | No                                 |
| TLR3                   | Immunofluorescence (1:200)                          | No                                 |
| TRAF3                  | Immunofluorescence (1:200)                          | No                                 |
| TRAF6                  | Immunofluorescence (1:200)                          | No                                 |
| IKK $\epsilon$         | Immunofluorescence (1:200)                          | No                                 |
| anti-dsRNA J2          | Immunofluorescence (1:100)                          | -                                  |
| $\beta$ -actin         | Western blot (1:1000)                               | -                                  |

bioRxiv preprint doi: <https://doi.org/10.1101/2020.06.11.145862>; this version posted June 11, 2020. The copyright holder for this preprint (which was not certified by peer review) is the author/funder, who has granted bioRxiv a license to display the preprint in perpetuity. It is made available under aCC-BY 4.0 International license.

Table 2 Primers used to construct plasmids

| Name            | Sequence (5'-3')                                                                                     |
|-----------------|------------------------------------------------------------------------------------------------------|
| IBV-nsp2        | Forward: CGC <u>GGATCC</u> GCTTCAAGCCTAAAACAG<br>Reverse: CCGCTCGAGCTAGCCTGCTTTGCAAACCAC             |
| IBV-nsp4        | Forward: CGC <u>GGATCC</u> TCTGGTTTTAAGAACTGGTT<br>Reverse: CCGCTCGAGCTATTGTAATCTAACACCACCAAT        |
| IBV-nsp5        | Forward: CGC <u>GGATCC</u> TCTTCTTTTGTAAAGAAAAGCT<br>Reverse: CCGCTCGAGCTATTGAACTGTAGCAATAGGCAA      |
| IBV-nsp6        | Forward: CGC <u>GGATCC</u> GCTAAATTGAGTGATGTAAAG<br>Reverse: CCGCTCGAGCTATTGTAATACCGTTGACCTCTT       |
| IBV-nsp7        | Forward: CGC <u>GGATCC</u> TCTGGTACTCAAGAATTCTCA<br>Reverse: CCGCTCGAGCTATTGCAAAAACAACATCAACCTT      |
| IBV-nsp8        | Forward: CGC <u>GGATCC</u> AATAATGAGCTTATGCCACAT<br>Reverse: CCGCTCGAGCTACTGTAAGACAACAACATTAGA       |
| IBV-nsp9        | Forward: CGC <u>GGATCC</u> AGCTTAAAGCTGAAACAGAG<br>Reverse: CCGCTCGAGCTATTGAACAGAAGATTTTGGTTG        |
| IBV-nsp12       | Forward: CGC <u>GGATCC</u> TCTCAGTTGCTGGAGCATCT<br>Reverse: CCGCTCGAGCTATTGTAAGTCGTAGGAGCTCT         |
| IBV-nsp15       | Forward: CGC <u>GGATCC</u> TCTATCGACAATATTGCTTAT<br>Reverse: CCGCTCGAGCTATTGAAGCTGTGGATAACA          |
| IBV-nsp16       | Forward: CGC <u>GGATCC</u> TCTCAGCATGGACGTGTGGT<br>Reverse: CCGCTCGAGCTACATAGTGCACACAAAATAGTC        |
| IBV-3b          | Forward: CGC <u>GGATCC</u> TAAACTTAGAAGTAATTATTGAA<br>Reverse: CCGCTCGAGCTATTATTCAATAAATTCATCATCACC  |
| IBV-E           | Forward: CGC <u>GGATCC</u> AATTTATTGAATAAGTCGCT<br>Reverse: CCGCTCGAGCTAAGAGTACAATTTGTCTCGTT         |
| IBV-5a          | Forward: CGC <u>GGATCC</u> AAATGGCTGACTAGTTTT<br>Reverse: CCGCTCGAGCTATCATGCCAGCGATTGGGT             |
| IBV-5b          | Forward: CGC <u>GGATCC</u> AATAATAGTAAAGATAATCCT<br>Reverse: CCGCTCGAGCTACTAGTTTAATGACTGGCGCTG       |
| IBV-M           | Forward: CCGGAATTC <u>CCCAACGAGACAAATTGT</u><br>Reverse: CCGCTCGAGCTATTATGTGTAAAGACTTCC              |
| IBV-N           | Forward: CGC <u>GGATCC</u> GCAAGCGGTAAAGCAGCT<br>Reverse: CCGCTCGAGCTATCAAAGTTGATTCTCTCCTAG          |
| IBV-nsp15-H223A | Forward: CCTACAAGCCATACTGTATGGTGAAGTTGATAAGCCC<br>Reverse: ACAGTATGGCTTGTAGGCCTAAGTCTTTACCATACC      |
| IBV-nsp15-H238A | Forward:<br>GTGGTTTAGCCACTGTTATAGGTATGTACAGACTCTTACGTG<br>Reverse: AACAGTGGCTAAACCACCTAATTGGGGCTTATC |

Note : The restriction enzyme sites were underlined.

Table 3 Plasmids for rIBV nsp15-H238A construction

| Number | Plasmid     | Resistance       | Fragment | Size  | Location (nt) |
|--------|-------------|------------------|----------|-------|---------------|
| 1      | pKTO-IBV-A  | Amp <sup>+</sup> | A        | 6.4kb | 1-5751        |
| 2      | pGEM-IBV-B  | Amp <sup>+</sup> | B        | 3.0kb | 5752-8693     |
| 3      | pXL-IBV-C   | Kan <sup>+</sup> | C        | 6.8kb | 8689-15520    |
| 4      | pGEM -IBV-D | Amp <sup>+</sup> | D        | 5.4kb | 15521-20900   |
| 5      | pGEM -IBV-E | Amp <sup>+</sup> | E        | 6.7kb | 20887-27608   |

bioRxiv preprint doi: <https://doi.org/10.1101/2020.06.11.145862>; this version posted June 11, 2020. The copyright holder for this preprint (which was not certified by peer review) is the author/funder, who has granted bioRxiv a license to display the preprint in perpetuity. It is made available under aCC-BY 4.0 International license.
